# Supplementary material for: Synthesis of locked cyclohexene and cyclohexane nucleic acids (LCeNA and LCNA) with modified adenosine units
Source: Royal Society of Chemistry journal article supplement (doi:10.1039/c4ob02193b), 2015-01-01
Supplement: c4ob02193b1.pdf [file c4ob02193b1.pdf]

## SUPPLEMENTARY INFORMATION

### Synthesis of Locked Cyclohexene and Cyclohexane Nucleic Acids (LCeNA and LCNA)

Michal Šála\*, Milan Dejmek, Eliška Procházková, Hubert Hřebabecký, Jiří Rybáček, Martin Dračínský, Pavel Novák, Šárka Rosenbergová, Jiří Fukal, Vladimír Sychrovský, Ivan Rosenberg, Radim Nencka\*

Institute of Organic Chemistry and Biochemistry, Academy of Sciences of the Czech Republic, v.v.i., Gilead Sciences & IOCB Research Centre, Czech Republic.

[sala@uochb.cas.cz](mailto:sala@uochb.cas.cz), [nencka@uochb.cas.cz](mailto:nencka@uochb.cas.cz)

### Contents

|                                                                                               |         |
|-----------------------------------------------------------------------------------------------|---------|
| 1. Determination of the optical purity of the compound <b>8b</b>                              | S2      |
| 2. Synthesis and hybridization properties of the homooligomers ( <b>A<sub>9</sub></b> )       | S4      |
| 3. Molecular dynamic calculations (experimental part)                                         | S6      |
| 4. GC-spectrum of the mixture of <b>9a/9b</b>                                                 | S7      |
| 5. Chromatograms of the chiral HPLC (compounds <b>8b</b> , <b>25</b> )                        | S8-S11  |
| 6. <sup>1</sup> H NMR, <sup>13</sup> C NMR, <sup>31</sup> P NMR for the new compounds         | S12-S36 |
| 7. cANA vs. LCeNA, Figure <b>S6</b>                                                           | S37     |
| 8. Results of molecular dynamic calculations                                                  | S38-S46 |
| 9. Conformational analysis of <b>25</b> and results of the DFT calculations                   | S47-S49 |
| 10. Monitoring of the allylic rearrangement ( <b>22a</b> to <b>22</b> ) by <sup>1</sup> H NMR | S50     |
| 11. Overlaid structures of nucleoside <b>25</b> and adenosine                                 | S51     |
| 12. References                                                                                | S52     |

## Determination of the optical purity of the compound **8b**

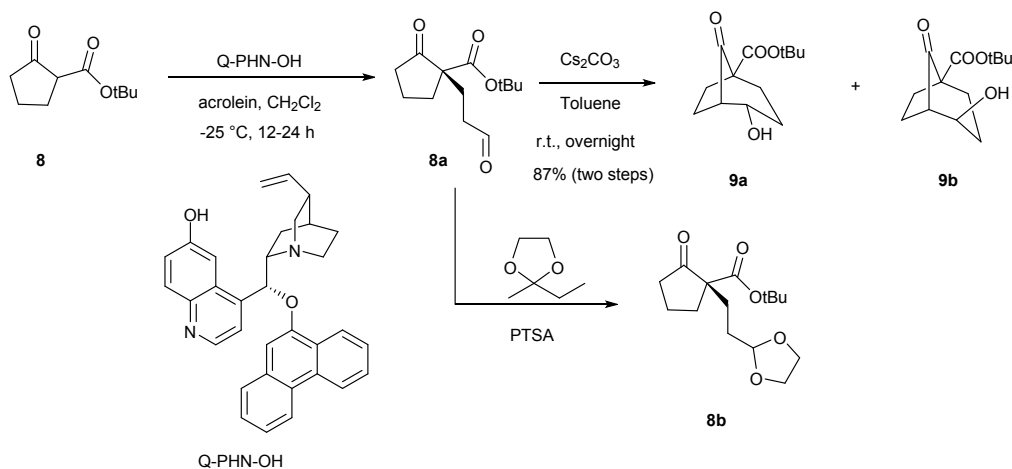

To a mixture of starting material **8** (9.05 g, 49.1 mmol) and catalyst **Q-PHN-OH**<sup>1</sup> (2.40 g, 4.93 mmol, 0.1 eq.) in dry  $\text{CH}_2\text{Cl}_2$  (100 mL) at  $-25\text{ }^\circ\text{C}$  under argon atmosphere, a solution of acrolein (8.23 mL, 123 mmol, 2.5 eq.) in  $\text{CH}_2\text{Cl}_2$  (30 mL) was added dropwise. Reaction mixture was occasionally stirred (>95% of time without stirring) and kept at  $-25\text{ }^\circ\text{C}$  for 24 h. Then the reaction mixture was poured onto silica gel column (200 g,  $\text{Et}_2\text{O}$ ) and crude product was eluted with  $\text{Et}_2\text{O}$ . Fractions containing product were collected and evaporated to afford crude **8a** (12.53 g) which was used immediately in the next step. Crude catalyst was then eluted from the column with methanol and recycled (chromatography on silica gel column in  $\text{CH}_2\text{Cl}_2$ :ethanol 25:1).

Crude product **8a** was dissolved in toluene (350 mL), cesium carbonate (8.48 g, 26 mmol) was added and the reaction mixture was stirred at r.t. overnight. Solids were removed by filtration through Celite and the filtrate was evaporated. Product was purified on a silica gel column (250 g, toluene:ethylacetate 3:1  $\rightarrow$  2:1) to afford 9.416 g (80%) of the mixture **9a** and **9b** (Figure S1.) Analytical samples of both isomers were obtained by column chromatography of the sample (300 mg of the mixture, 100 g of silica gel, toluene:ethylacetate 3:1  $\rightarrow$  2:1).

### Determination of optical purity – preparation of compound **8b**.

Crude aldehyde intermediate **8a** (250 mg) in 2-ethyl-2-methyl-1,3-dioxolane (0.3 mL) was stirred at r.t. with *p*-TsOH (9 mg) for 45 min. Then the reaction mixture was diluted with diethyl ether (30 mL) and washed with saturated sodium bicarbonate solution (10 mL). Organic phase was dried with sodium sulfate and evaporated. Residue was purified by chromatography (50 g) in pentane:ether (2:1) and the obtained product **8b** was analyzed by

chiral HPLC (Eurocel 01 Knauer, in hexane: *i*-PrOH 97:3, Fig. **S2**, **S3**). NMR spectra match those reported<sup>1</sup>.

## Synthesis and hybridization properties of the homooligomers (A<sub>9</sub>)

### Synthesis of homooligomers

Adenine homooligomers were synthesized using UNYLINKER solid support (Glen Res.). Gaseous ammonia (0.7 MPa) cleavage of the oligoadenylate from this support proceeded well, however, MALDI TOF (Table S2, Figure S1) revealed residual part of the linker attached to the 3'-end of oligoadenylate analog. Oligonucleotides were purified at 55°C on DNAPac PA100 10 x 250 mm Nucleic Acid Column (Dionex) at a flow rate of 3 mL/min using a linear gradient of sodium chloride (20 mM→500 mM, 60 min) in 50 mM sodium acetate buffer pH 7.0 containing 20% (v) of acetonitrile. Desalting of pure oligonucleotides was performed on 10 µm Luna C18 (2) 10 x 100 mm column (Phenomenex) at a flow rate of 3 mL/min using a gradient of acetonitrile (0→25%, 30 min) in 0.1 M triethylammonium hydrogencarbonate. Desalted oligonucleotides were freeze-dried and characterized by MALDI TOF (Table S1.).

Table S1. Analytical data for oligonucleotides

| Oligonucleotide                                      | Calcd. mass | Found mass |
|------------------------------------------------------|-------------|------------|
| ( <u>A</u> <sup>25</sup> ) <sub>9</sub> <sup>a</sup> | 3342.70     | 3343.8     |
| ( <u>A</u> <sup>25</sup> ) <sub>9</sub> <sup>a</sup> | 3360.83     | 3360.0     |

<sup>a</sup> Oligomer contained residual part of the linker, see Figure S1.

### Hybridization properties of homooligomers (A<sub>9</sub>)

The denaturation experiments showed again strongly destabilization effect (Table S2.). We also measured behaviour of the modified homooligomer (A<sup>25</sup>)<sub>9</sub> in solution without complementary chain (T<sub>9</sub>). From observation of the hyperchromic effects (modified homooligomer (A<sup>25</sup>)<sub>9</sub> ~ 0.04, natural A<sub>9</sub> ~ 0.12) we assume that the *T<sub>m</sub>* of the modified homooligomer is independent on the presence of the complementary chain in the mixture and there is no duplex formation.

**Table S2.** Thermal stability of modified oligonucleotide duplexes<sup>a</sup>

| Oligonucleotide <sup>c</sup>            | ssRNA               | ssDNA               |
|-----------------------------------------|---------------------|---------------------|
|                                         | $T_m(\Delta T_m)^b$ | $T_m(\Delta T_m)^b$ |
| ( <u>A</u> <sup>25</sup> ) <sub>9</sub> | no comp. form.      | no comp. form.      |
| ( <u>A</u> <sup>26</sup> ) <sub>9</sub> | no comp. form.      | no comp. form.      |

<sup>a</sup> 4  $\mu$ M duplex in 50 mM NaH<sub>2</sub>PO<sub>4</sub> – Na<sub>2</sub>HPO<sub>4</sub> pH 7.2 with 100 mM NaCl; <sup>b</sup> per modification; <sup>c</sup> Oligomer contained residual part of the linker, see Figure S1.

**Figure S1.** Structures of the homooligomers with attached residual part from the linker

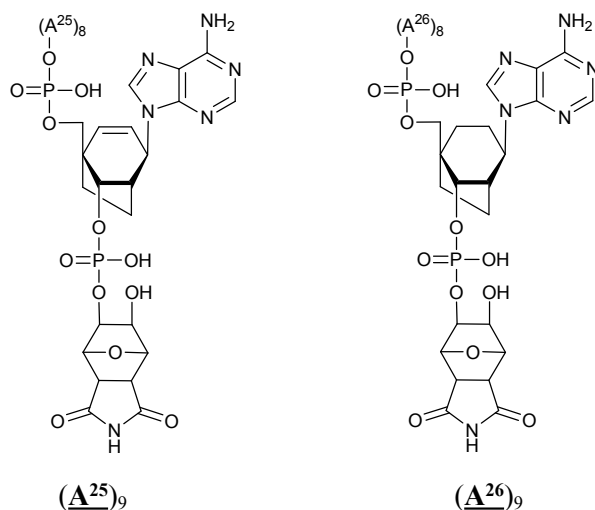

## **Molecular dynamic calculations (experimental part)**

The structural models of normal RNA-RNA oligonucleotide, oligonucleotide containing A5 adenosine residue with modified sugar and oligonucleotide containing A3, A5, and A8 modified residues were prepared employing the structure with PDB ID 1HG9 for RNA-DNA molecule that have similar sequence end length as the studied molecules. The three structural models were prepared by structure editing of original 1HG9 structure employing the Avogadro software. The parameterization of force-field for the chemically modified sugar moieties was based on ESP population analysis employing the Hartree-Fock method and the 6-31g(d,p) basis. The standard parmbsc0 force field was employed for all other residues. The three constructs were solvated by TIP3P water in a 15 Å x 15 Å x 15 Å box and negative charges of phosphate groups were compensated by added Na<sup>+</sup> ions by employing xLEaP software.

Each of the systems was firstly equilibrated employing following protocol. The RNA construct was restrained (force constant 25 kcal/mol) and heated from 100 K to 300 K during 100 ps molecular dynamic run. Then, minimization followed by short equilibration lasting 50 ps was performed five times with decreasing force constant up to 1 kcal/mol. Then, 100 ps dynamics employing force constant 0.5 kcal/mol was performed. The equilibration process lasting in total 500 ps was finished by unconstrained 50 ps dynamics. After the equilibration the 20 ns production dynamics for all three constructs has been calculated. All the molecular dynamic calculations using Amber 10 program were carried out at standard laboratory conditions; temperature 298.15 K, pressure 1 atm.

Figure S2. GC chromatogram of the mixture of **9a** and **9b**.

File :D:\Data\MS\_cyclization\_21\_07.D  
 Operator : Galeta  
 Acquired : 21 Jul 2014 13:54 using AcqMethod AS\_M-NIZKE\_C-VYSOKE.M  
 Instrument : 6890N + 5975B  
 Sample Name: MS\_cyclization\_21\_07  
 Misc Info :  
 Vial Number: 5

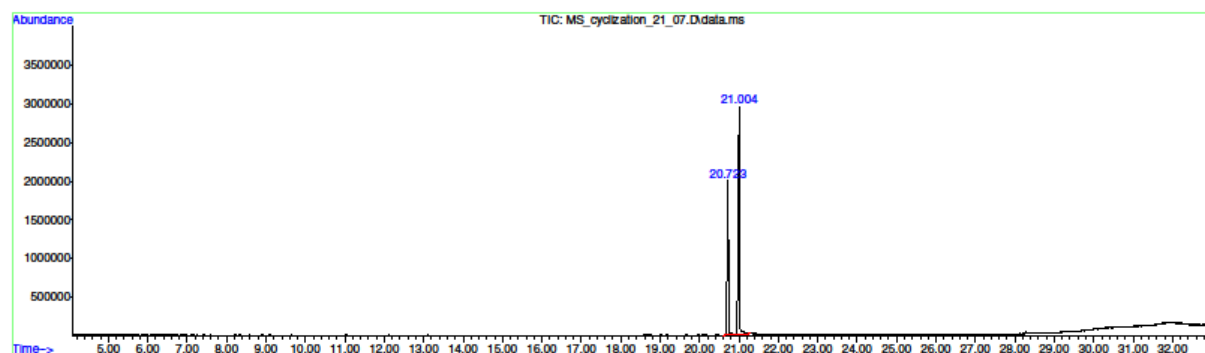

# Area Percent Report

Data Path : D:\Data\  
 Data File : MS\_cyclization\_21\_07.D  
 Acq On : 21 Jul 2014 13:54  
 Operator : Galeta  
 Sample : MS\_cyclization\_21\_07  
 Misc :  
 ALS Vial : 5 Sample Multiplier: 1

Integration Parameters: autoint1.e  
 Integrator: ChemStation

Method : D:\Data\PP-P617-3.D\AS\_M-VYSOKE\_C-VYSOKE.M  
 Title :

Signal : EIC TIC: MS\_cyclization\_21\_07.D\data.ms

| peak<br># | R.T.<br>min | first<br>scan | max<br>scan | last<br>scan | PK<br>TY | peak<br>height | corr.<br>area | corr.<br>% max. | % of<br>total |
|-----------|-------------|---------------|-------------|--------------|----------|----------------|---------------|-----------------|---------------|
| 1         | 20.723      | 1300          | 1309        | 1320         | BV       | 1960426        | 43452777      | 63.77%          | 38.939%       |
| 2         | 21.004      | 1320          | 1331        | 1353         | VV       | 2641477        | 68138671      | 100.00%         | 61.061%       |

Sum of corrected areas: 111591448

AS\_M-VYSOKE\_C-VYSOKE.M Tue Jul 22 11:54:34 2014 CHEMSTATION

Figure S3. Chromatogram of racemic mixture of **8b**.

11.7.2013 15:00 Chromatogram C:\Clarity\Work1\DATA\MS-RAC-03-07\_EC1\_01.PRM Page 1 of 1

Sample Info:  
 Sample ID : MS-RAC-03-07  
 Sample : MS-racemat  
 Inj. Volume [ml] : 0  
 Amount : 0  
 ISTD Amount : 0  
 Dilution : 1  
 Column : Eurocel 01 (Knauer) 250 x 4.6 mm, 5 µm  
 Mobile Phase : hexane : i-PrOH = 97 : 3  
 Flow Rate : 1.0 mL/min  
 Note :  
 Detection : Chiralysar + UV 220 nm  
 Temperature :  
 Pressure : 30 atm

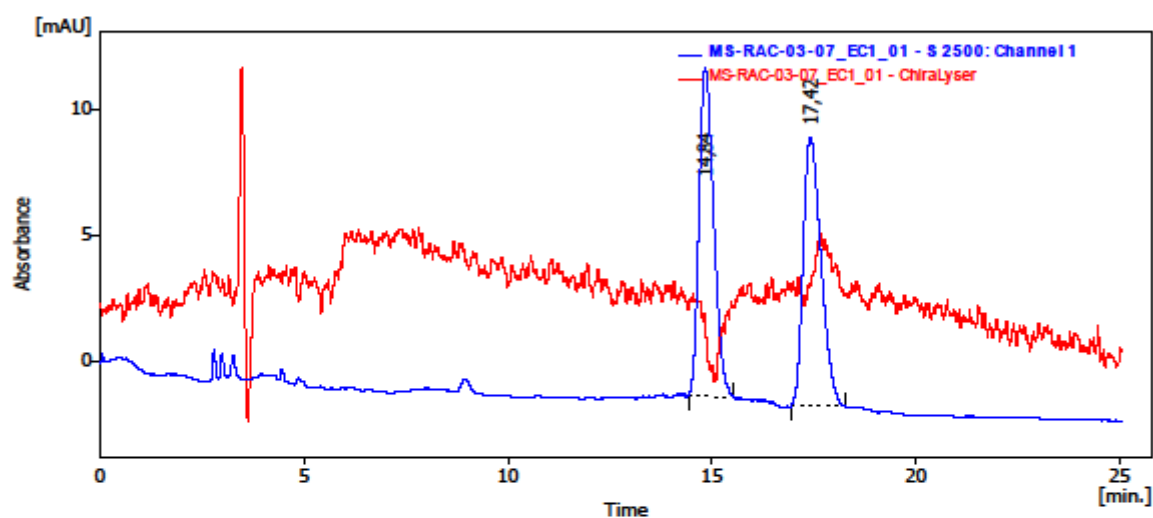

Result Table (Uncal - MS-RAC-03-07\_EC1\_01 - S 2500: Channel 1)

|   | Reten. Time<br>(min) | Area<br>(mAU.s) | Height<br>(mAU) | Area<br>(%) | Height<br>(%) | W05<br>(min) |
|---|----------------------|-----------------|-----------------|-------------|---------------|--------------|
| 1 | 14,940               | 323,75          | 13,078          | 50,0        | 55,0          | 0,40         |
| 2 | 17,420               | 323,46          | 10,688          | 50,0        | 45,0          | 0,48         |
|   | Total                | 647,20          | 23,767          | 100,0       | 100,0         |              |



Figure S4. Chromatogram of **8b**.

11.7.2013 15:28

Chromatogram C:\Clarity\Work1\DATA\MS-S-03-07\_EC1\_01.PRM

Page 1 of 1

Sample Info:

Sample ID : MS-RAC-03-07  
Sample : MS-racemat  
Inj. Volume [ml] : 0

Amount : 0  
ISTD Amount : 0  
Dilution : 1

Column : Eurocel 01 (Knauer) 250 x 4.6 mm, 5 µm  
Mobile Phase : hexane : i-PrOH = 97 : 3  
Flow Rate : 1.0 mL/min  
Note :

Detection : Chiralysar + UV 220 nm  
Temperature :  
Pressure : 30 atm

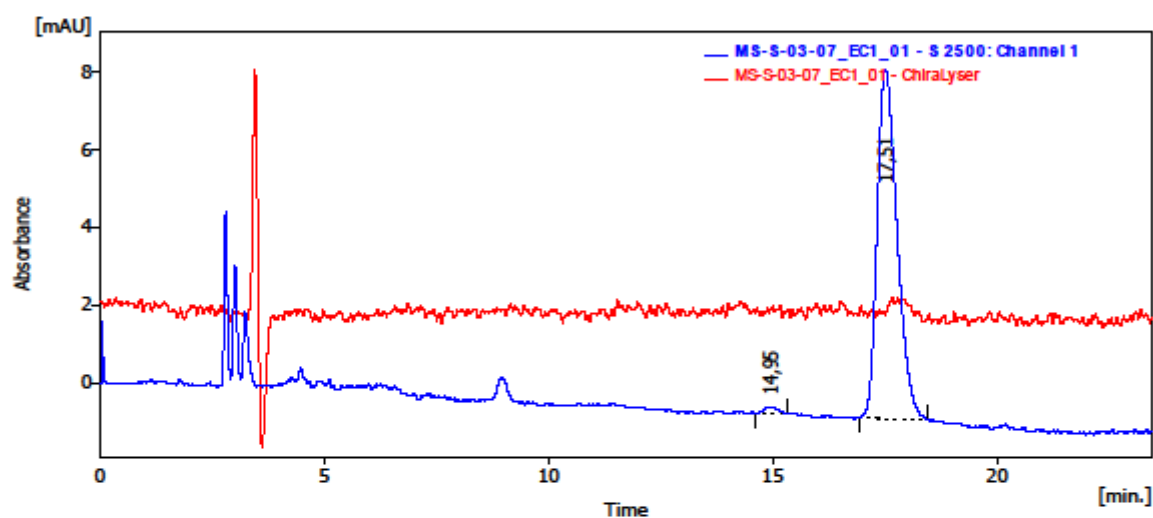

Result Table (Uncal - MS-S-03-07\_EC1\_01 - S 2500: Channel 1)

|   | Reten. Time<br>[min] | Area<br>[mAU.s] | Height<br>[mAU] | Area<br>[%] | Height<br>[%] | W05<br>[min] |
|---|----------------------|-----------------|-----------------|-------------|---------------|--------------|
| 1 | 14.953               | 3.56            | 0.169           | 1.3         | 1.8           | 0.37         |
| 2 | 17.513               | 277.11          | 8.985           | 98.7        | 98.2          | 0.48         |
|   | Total                | 280.66          | 9.154           | 100.0       | 100.0         |              |

Figure S5. Separation of racemic nucleoside **25** on chiral HPLC column. Sample of the racemic nucleoside **25** was prepared using completely the same synthetic scheme and procedures only the conversion of **8** to mixture of **9a/9b** was done in an achiral way according to the published protocol<sup>2</sup>.

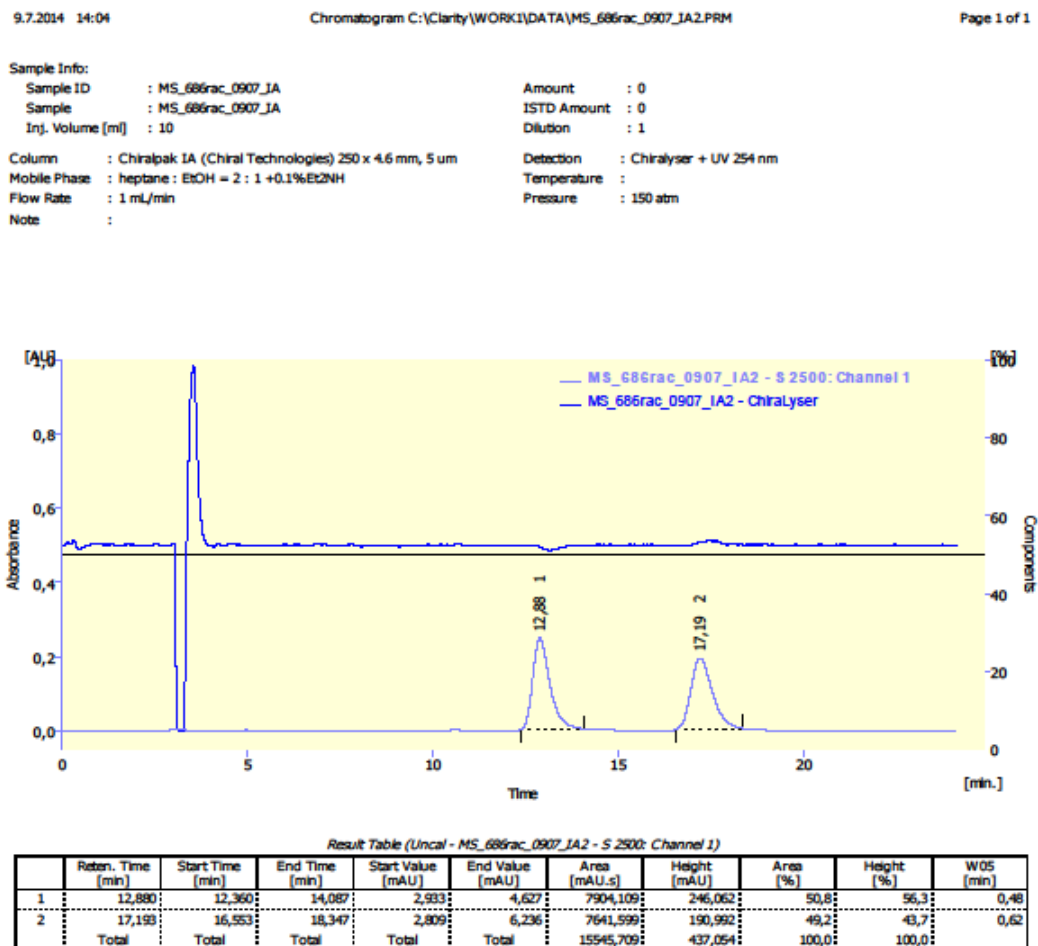

Figure S6. Separation of nucleoside **25** (single enantiomer) on chiral HPLC column

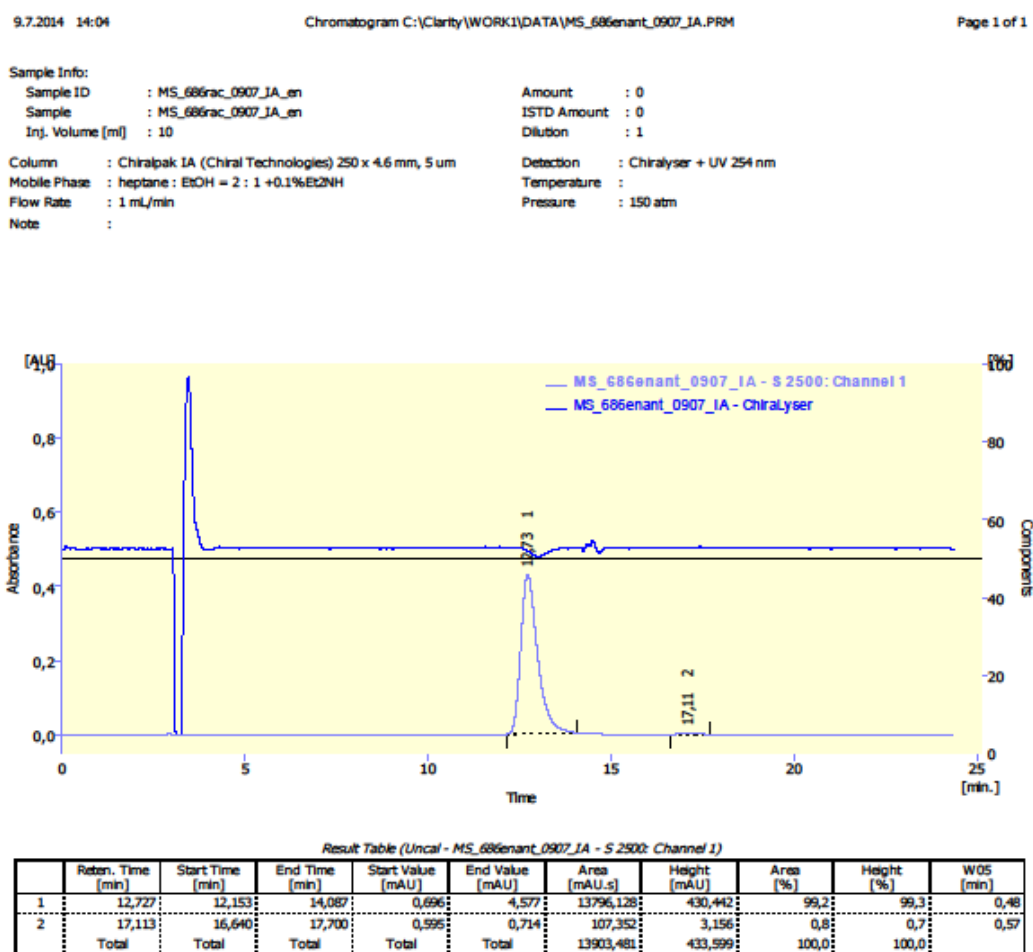

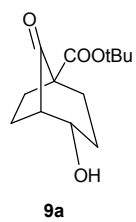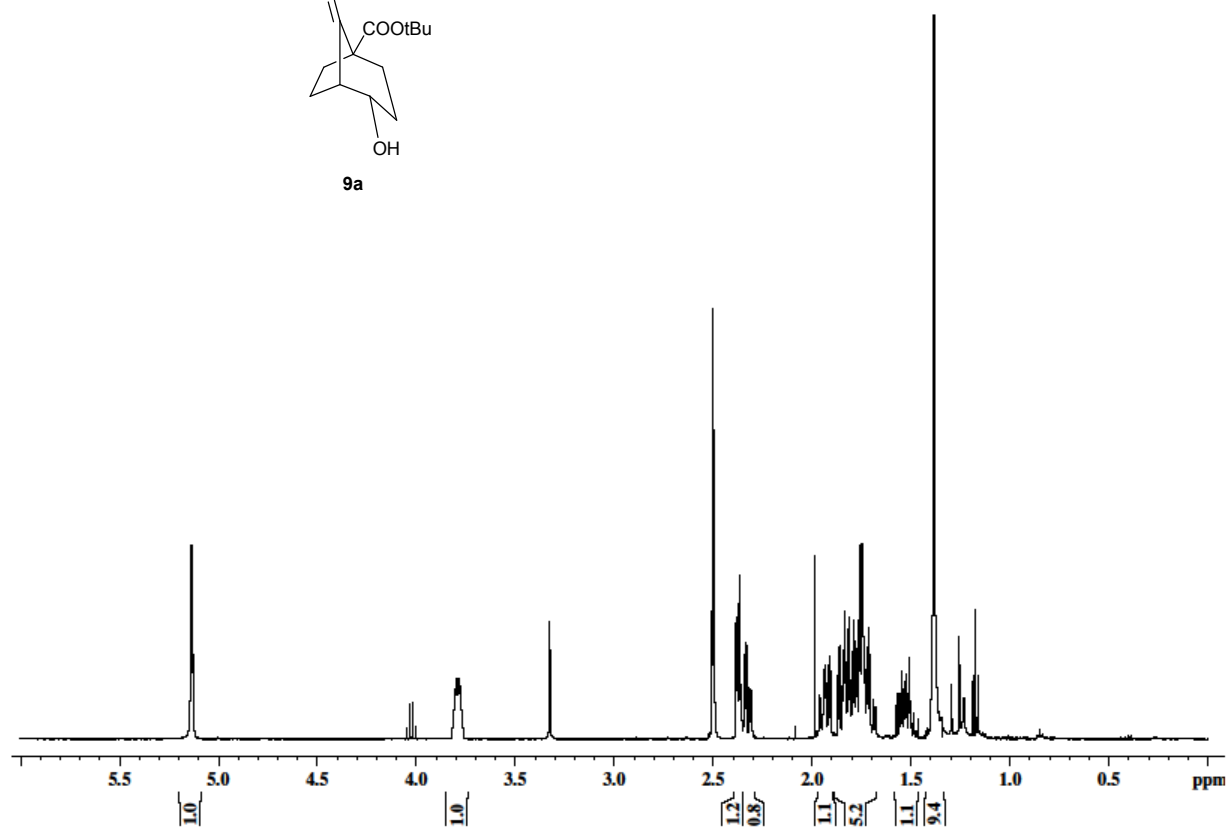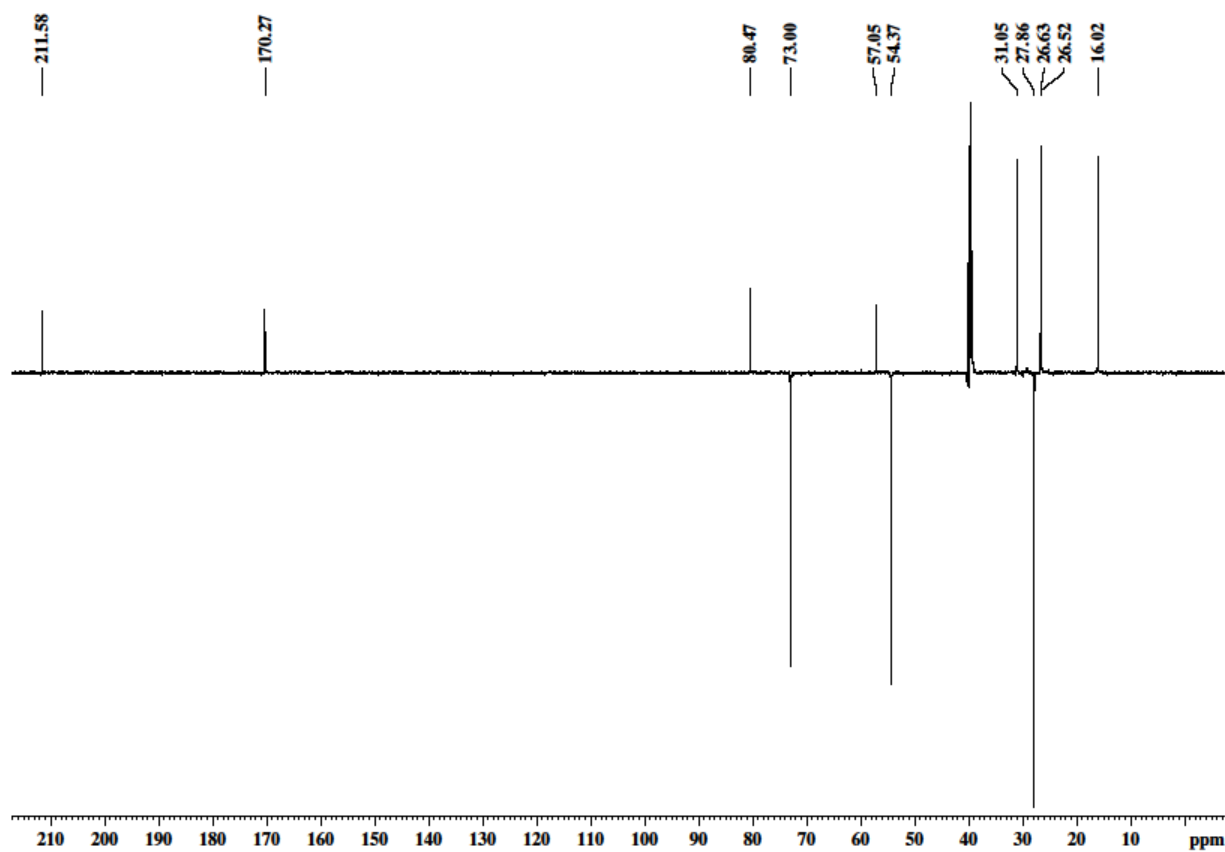

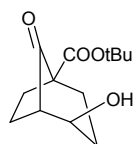

9b

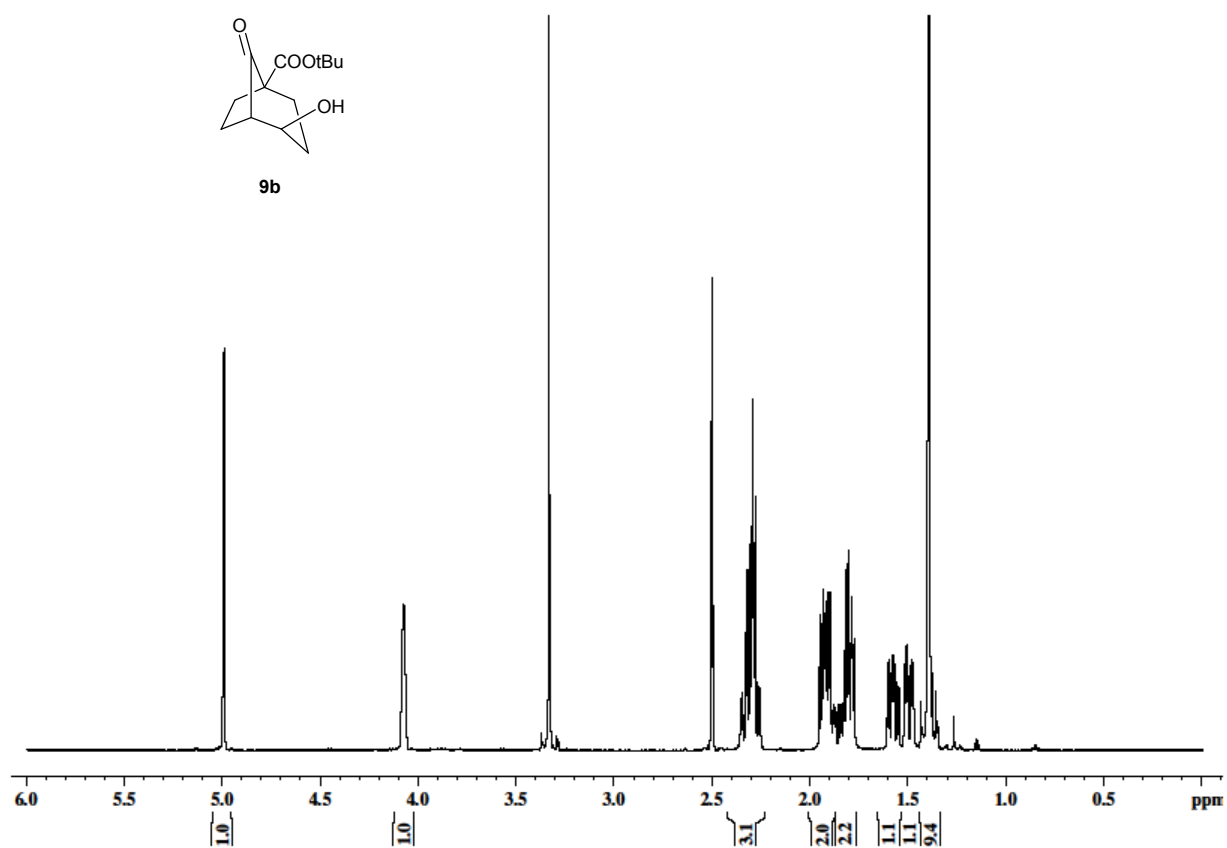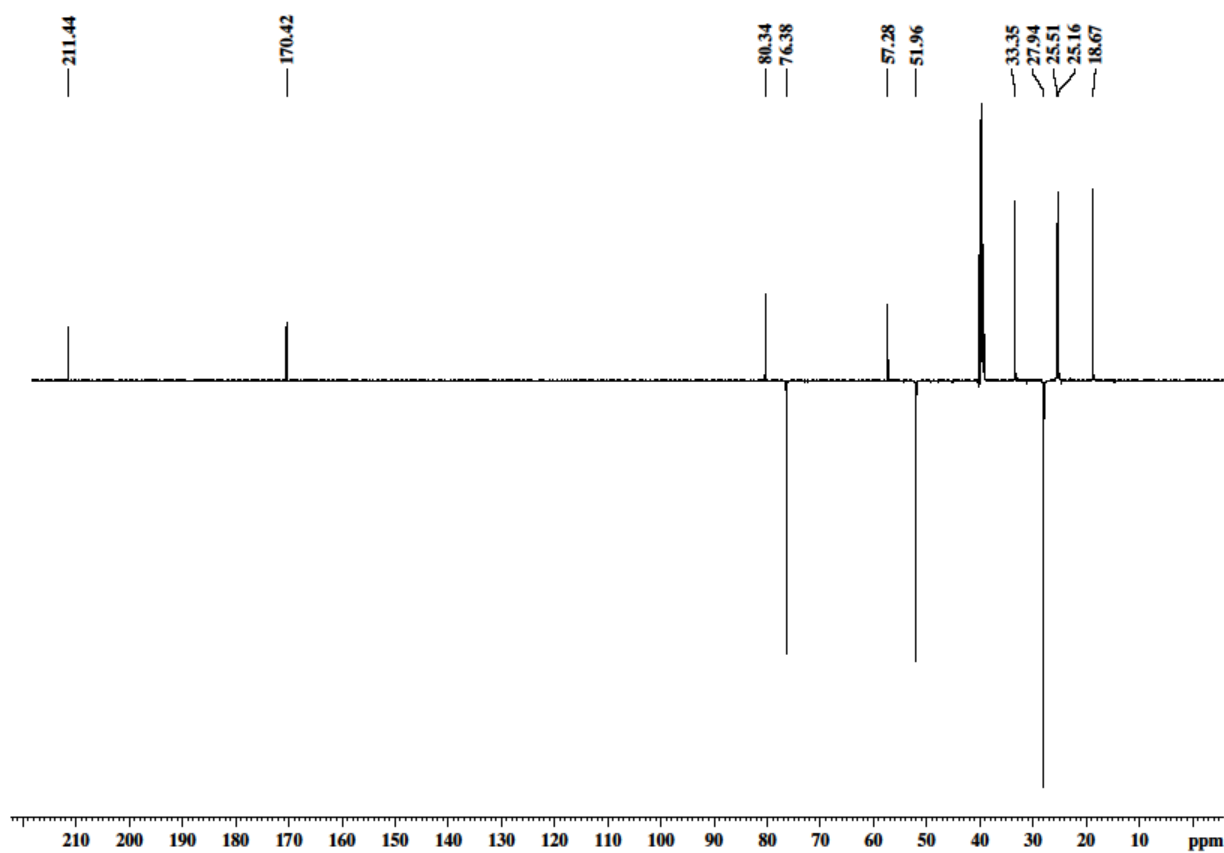

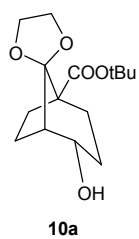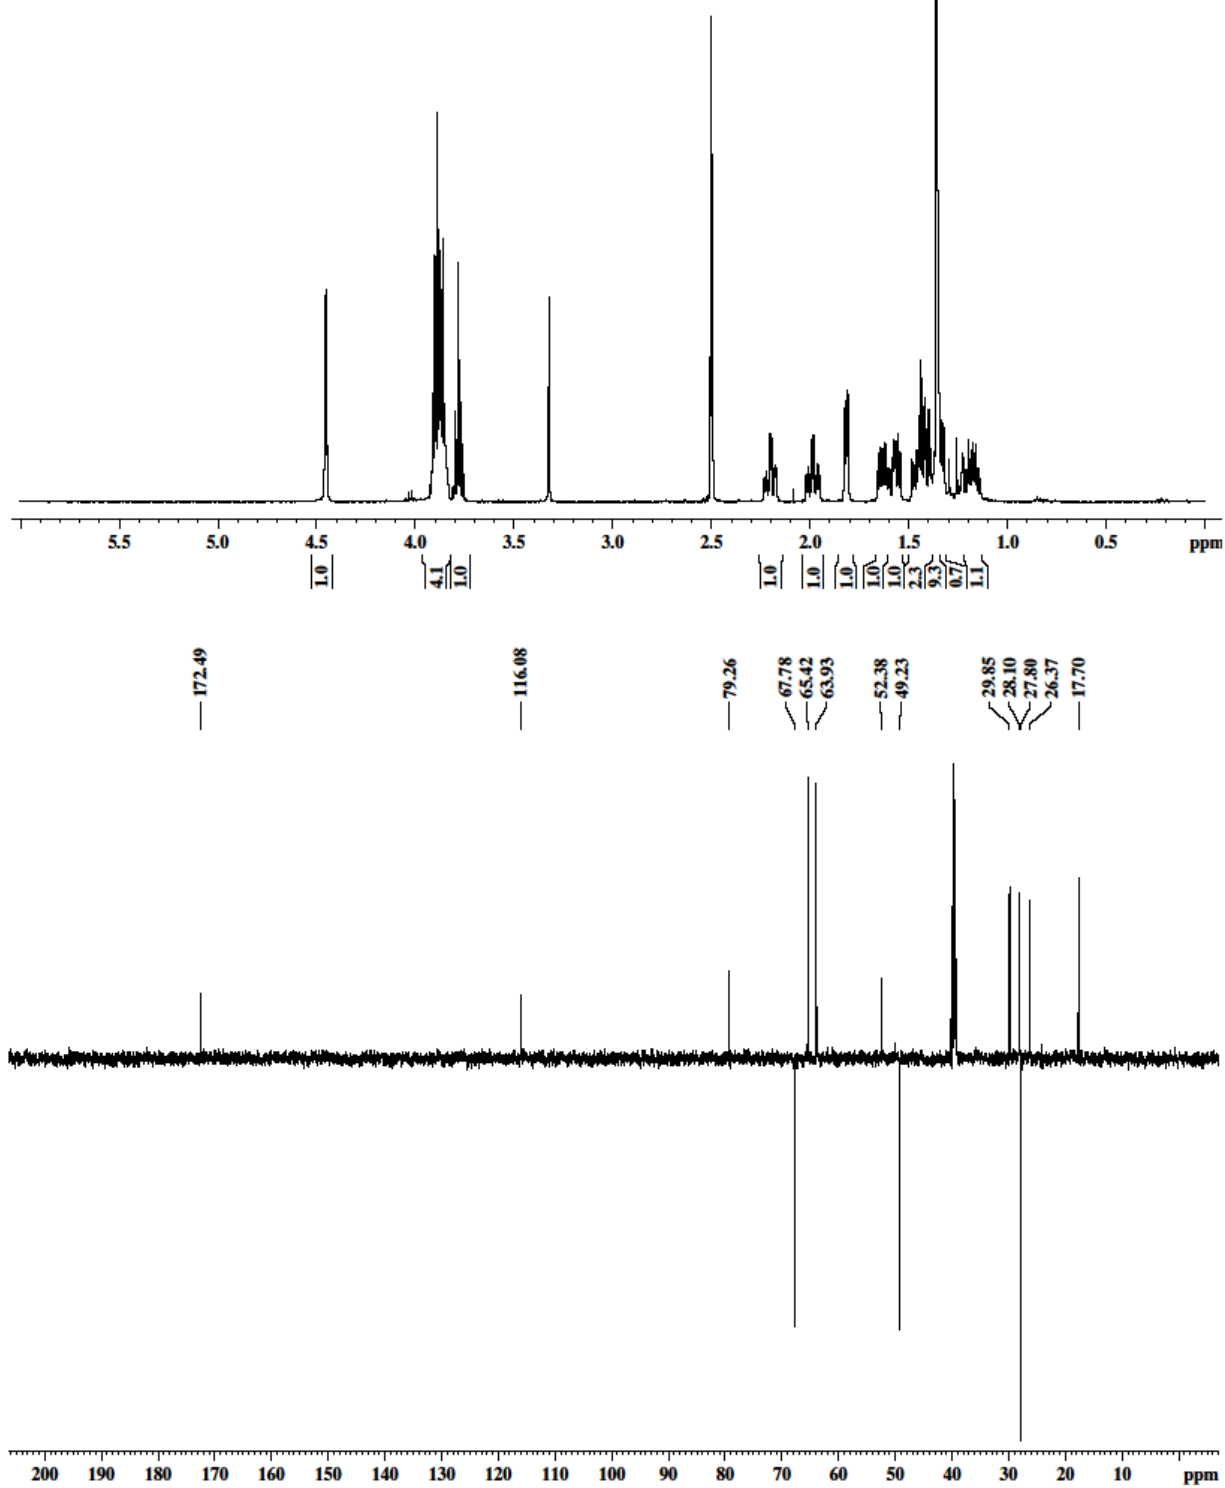

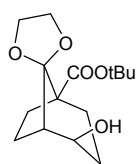

10b

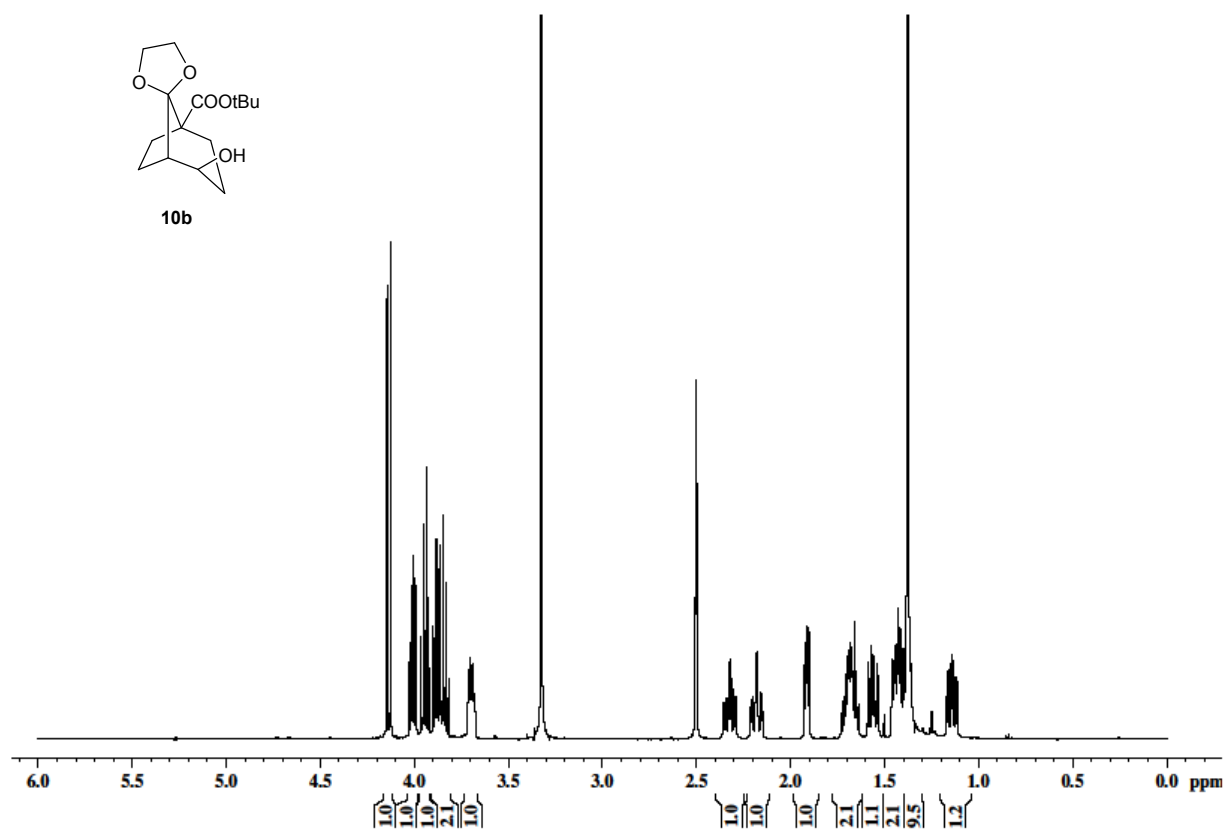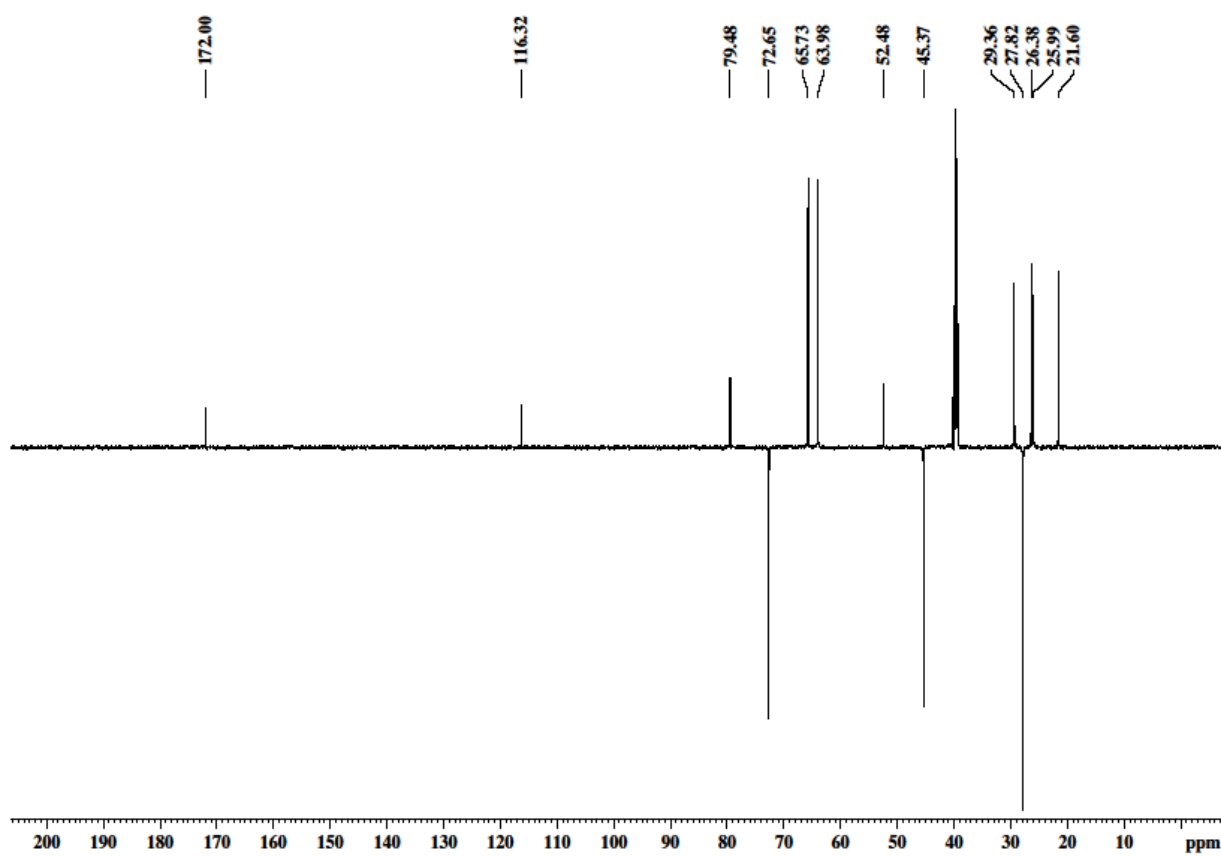

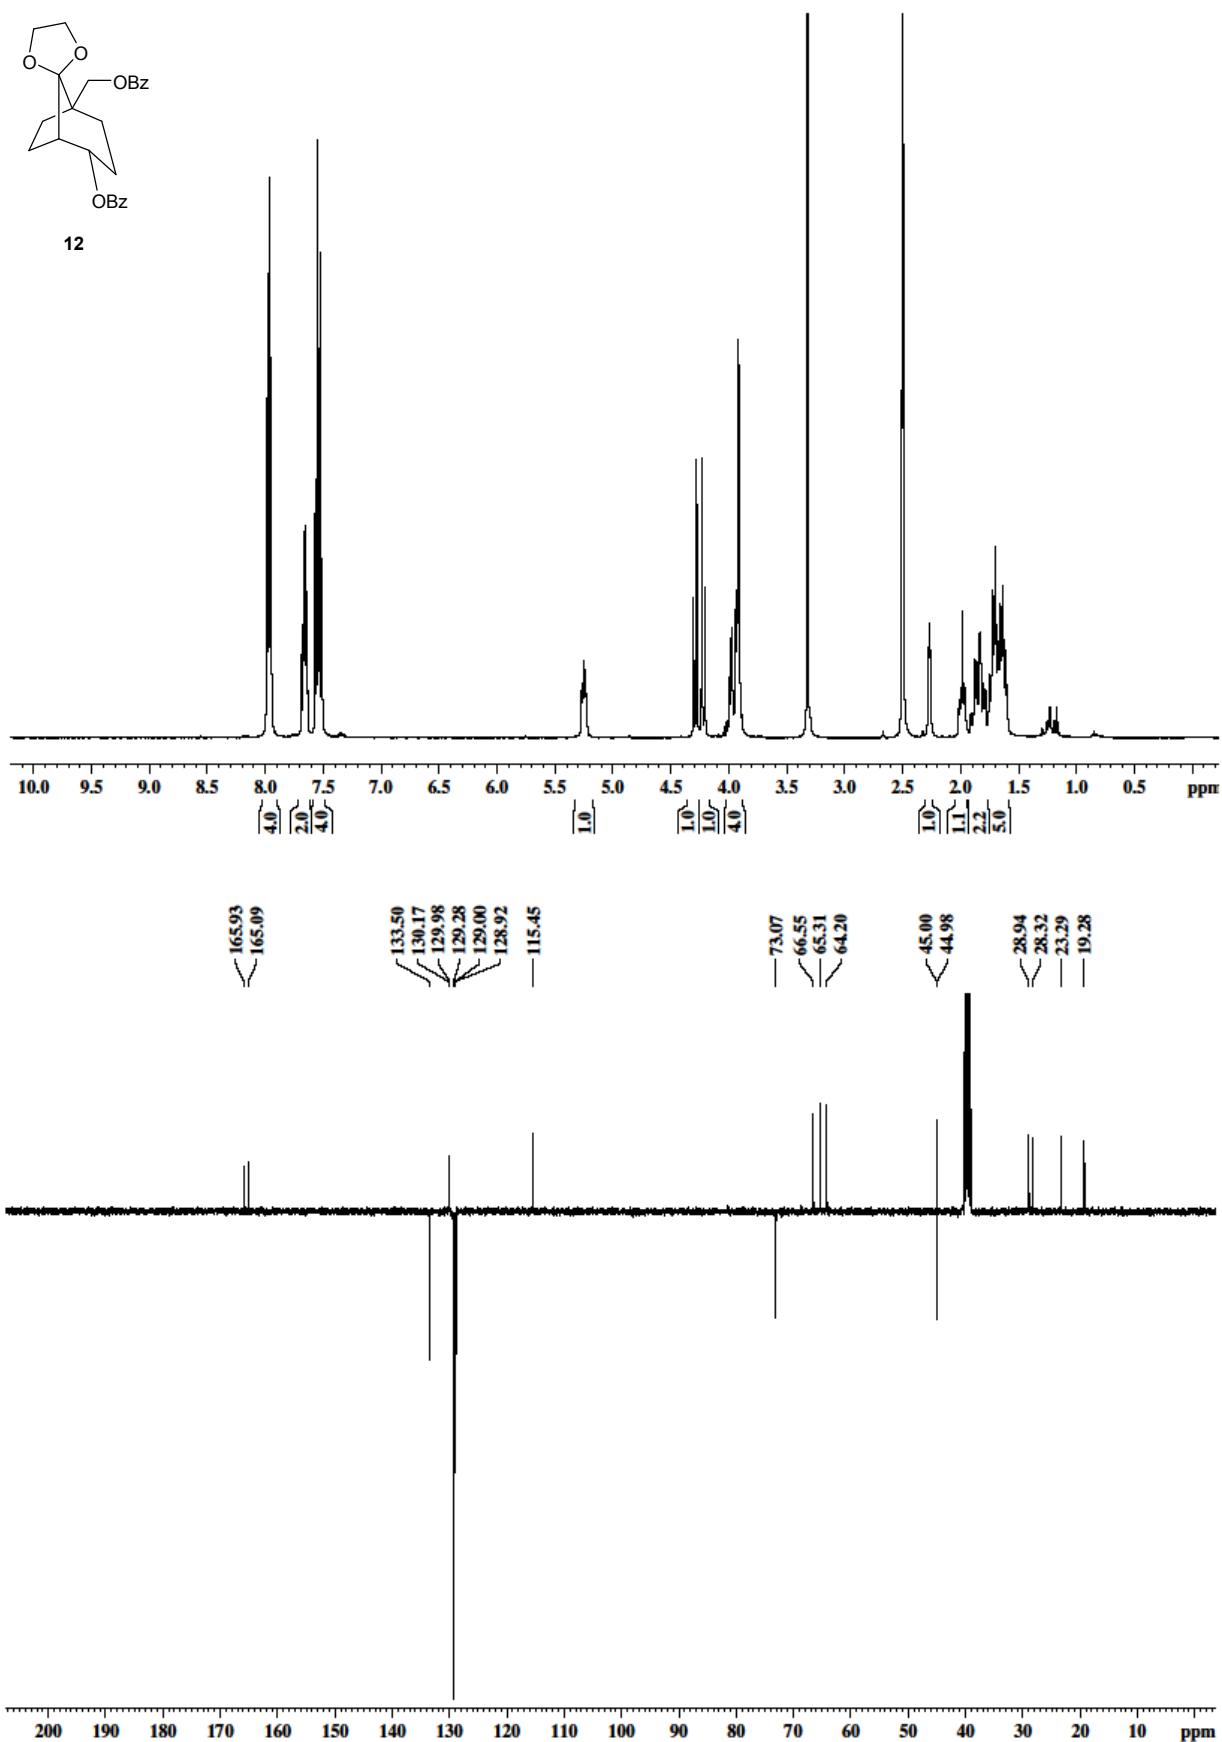



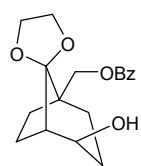

13a

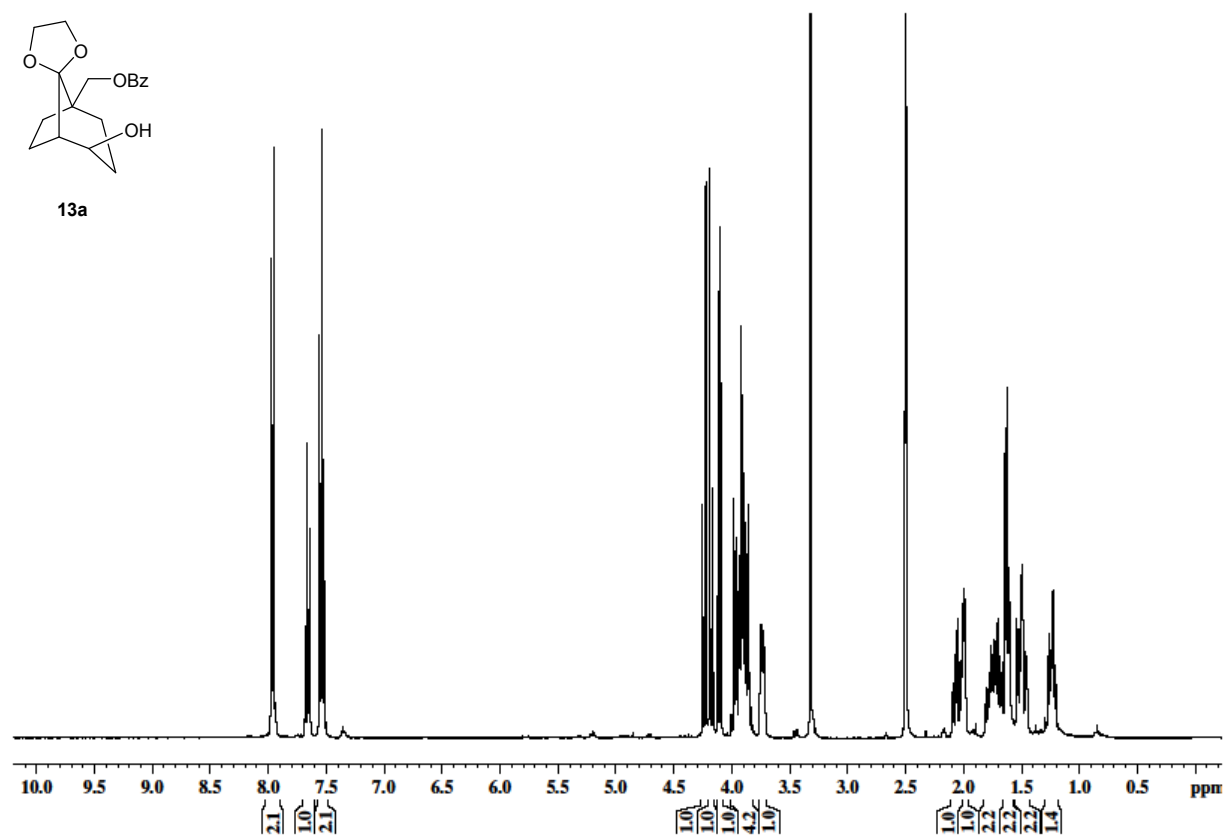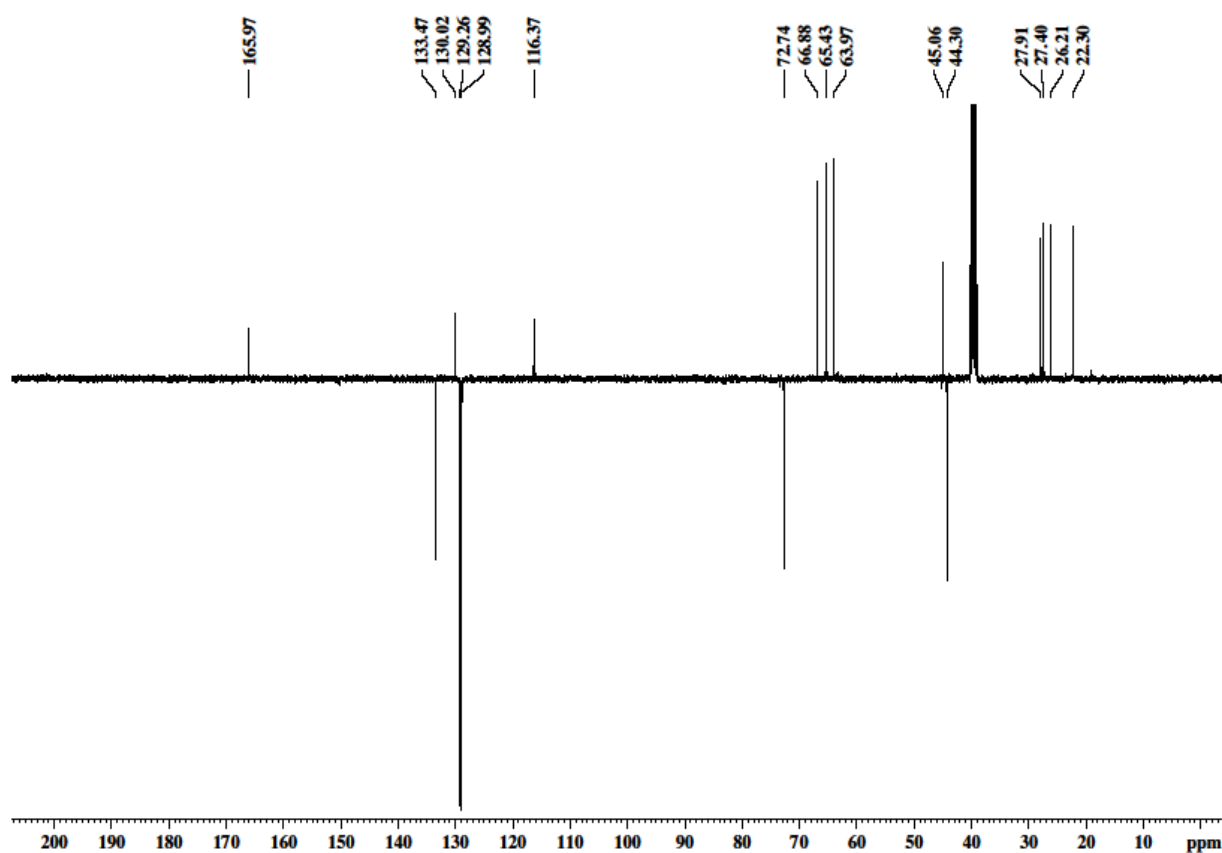

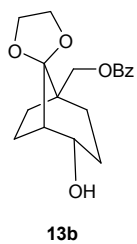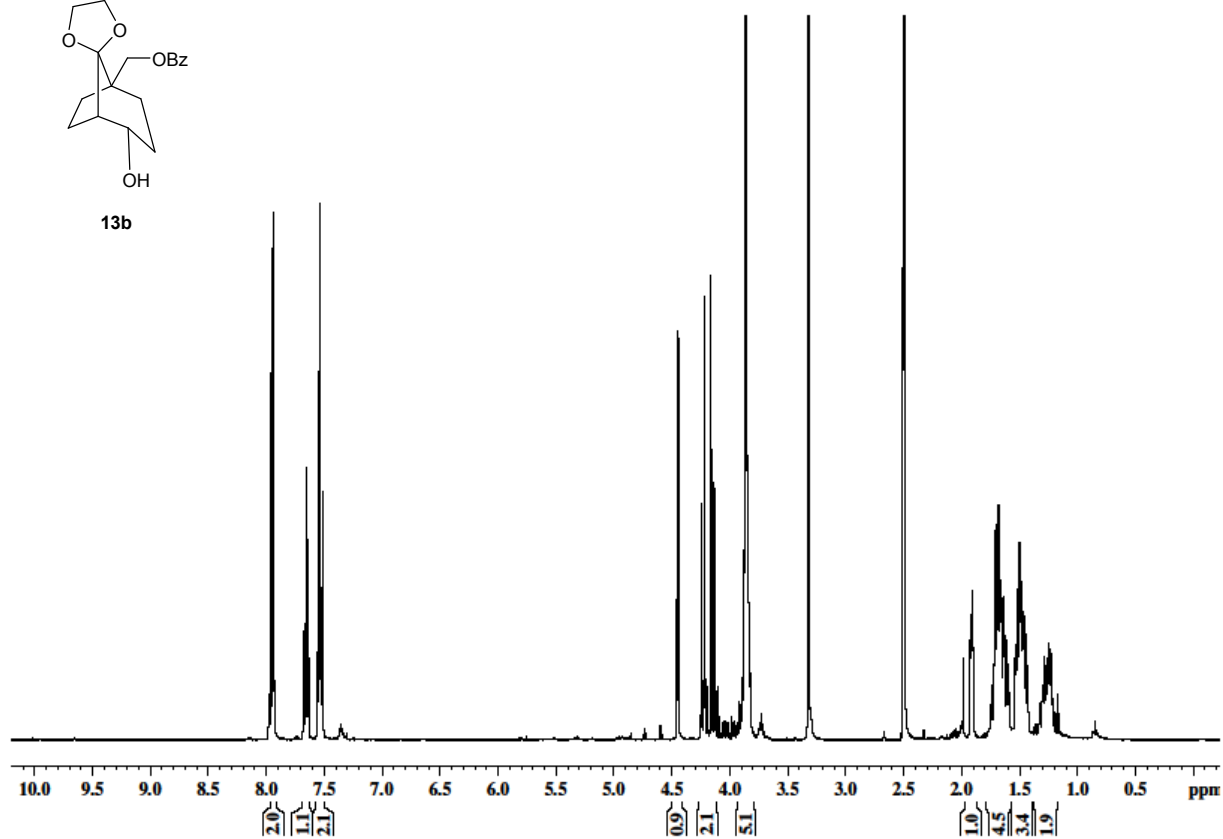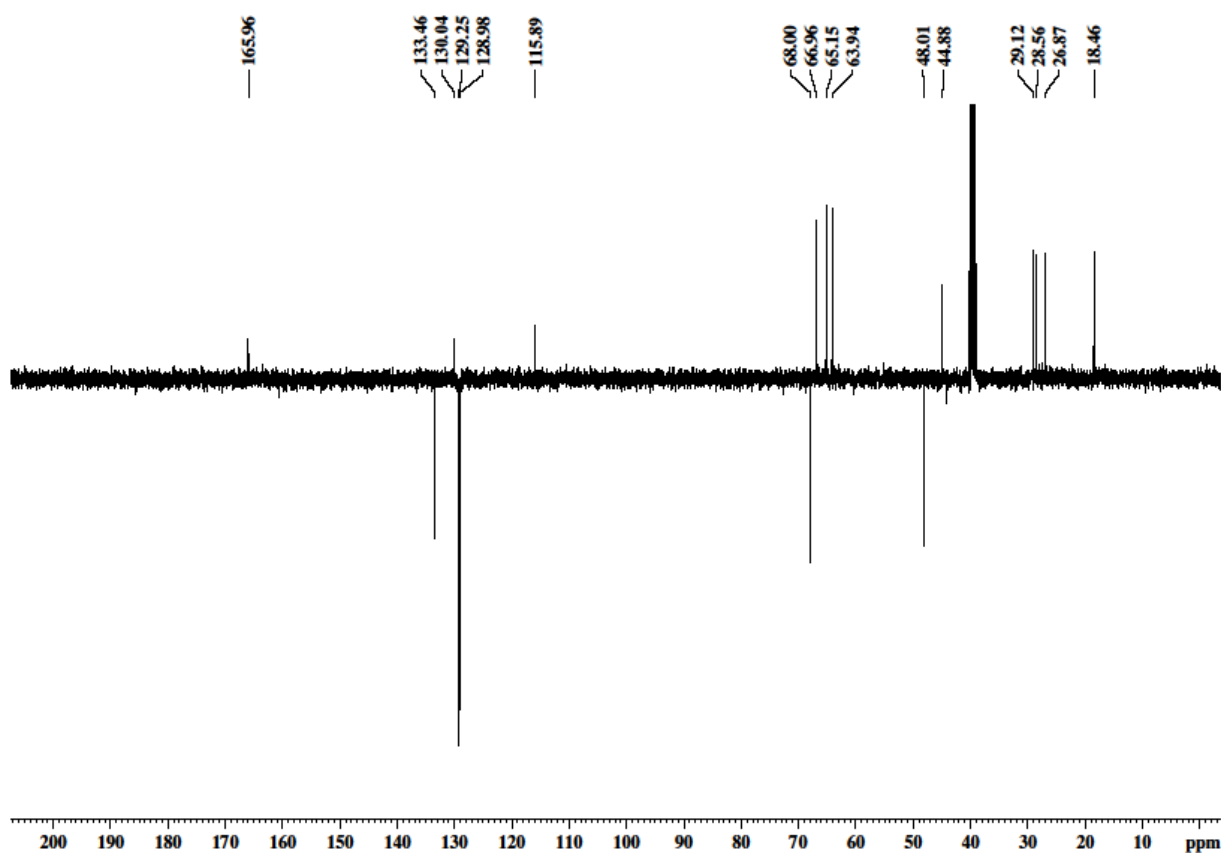

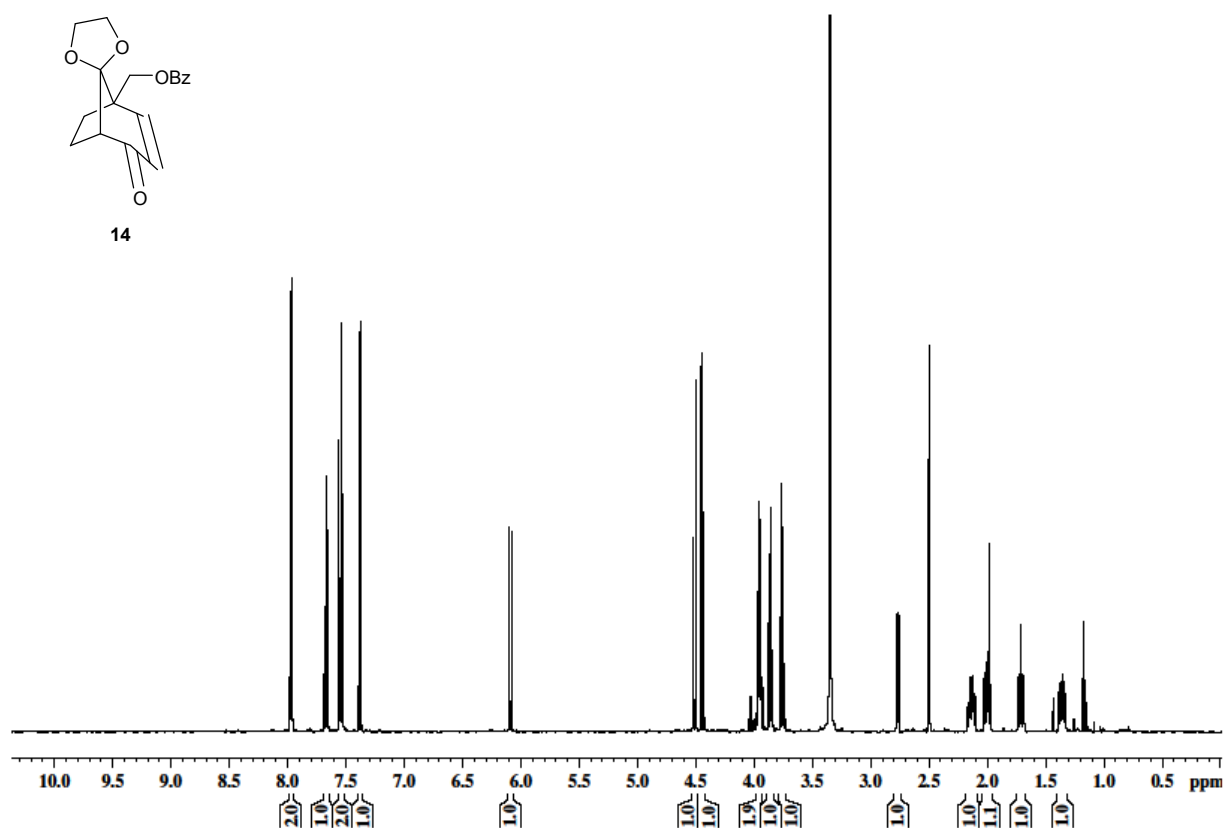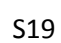

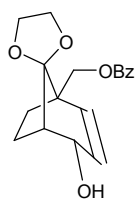

15

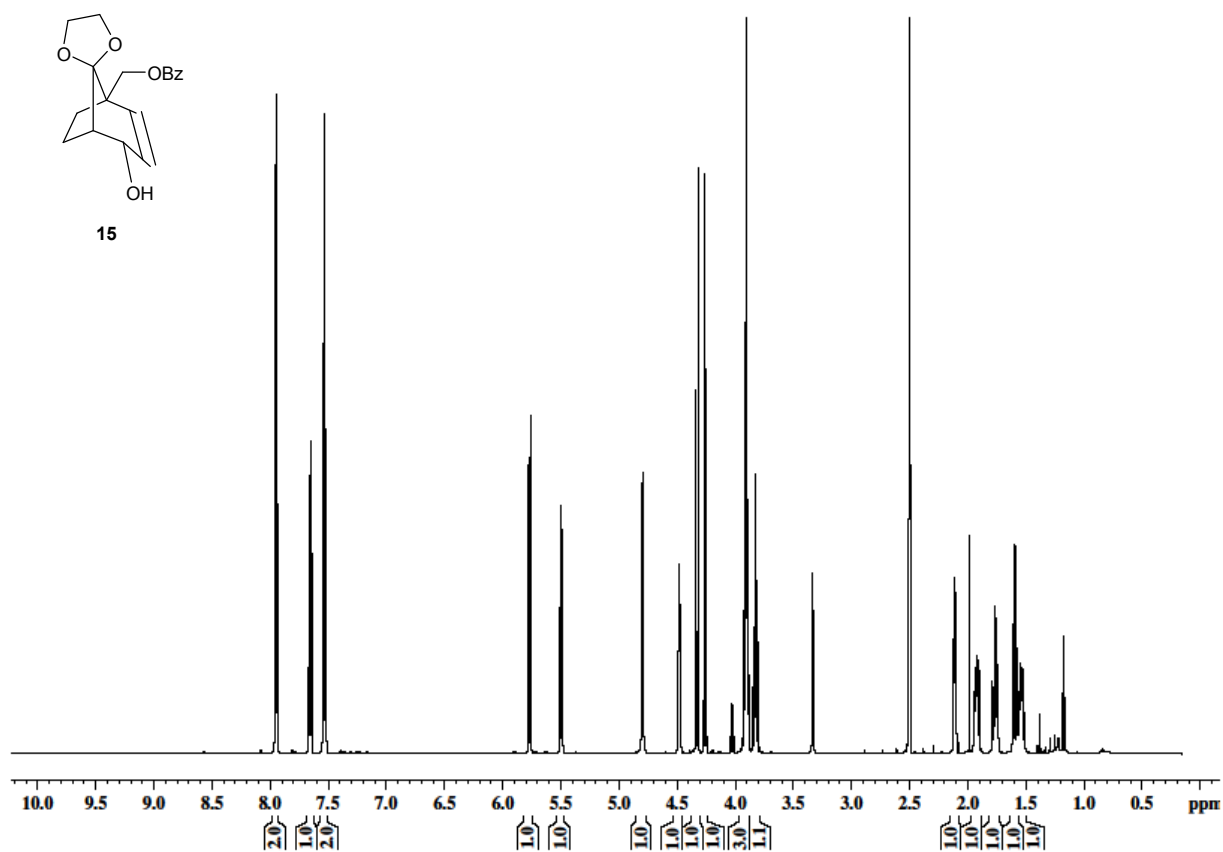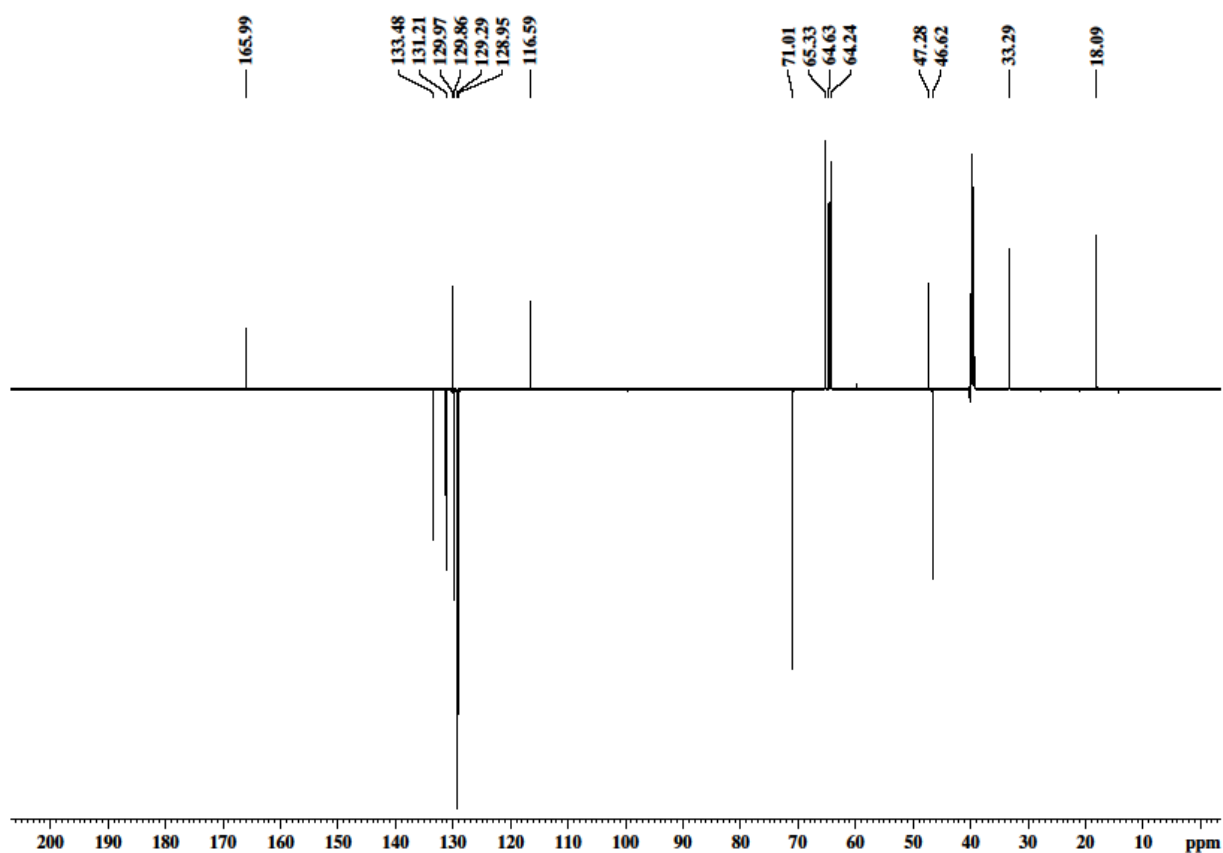

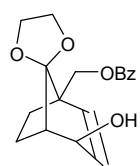

16

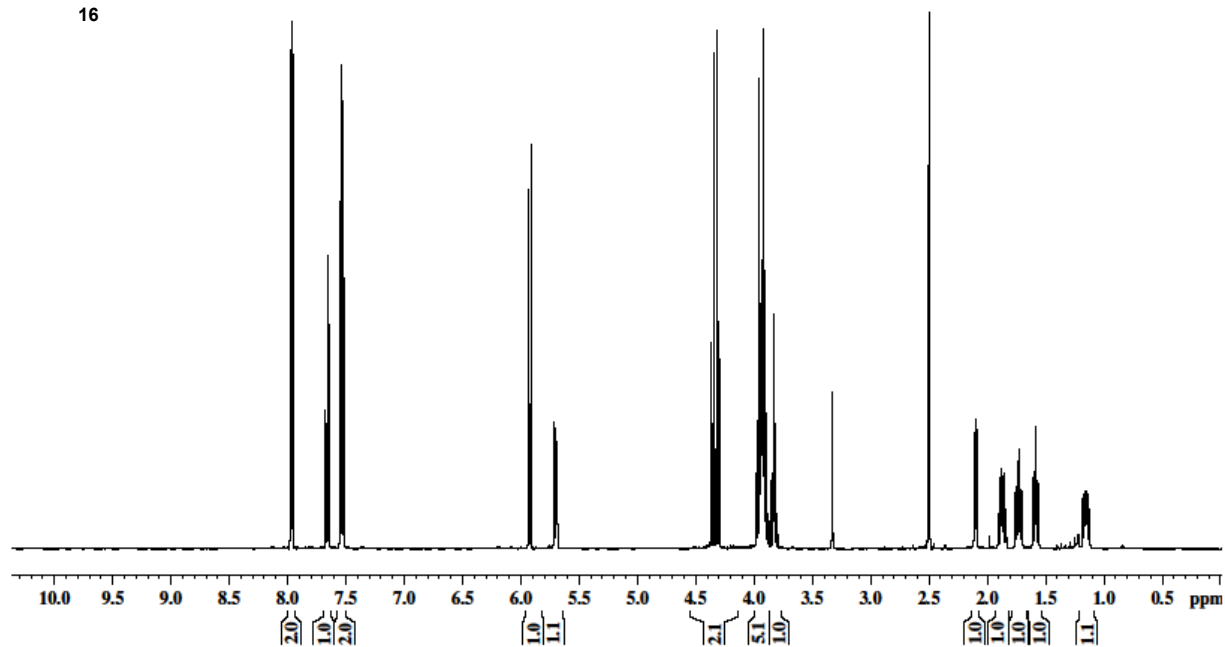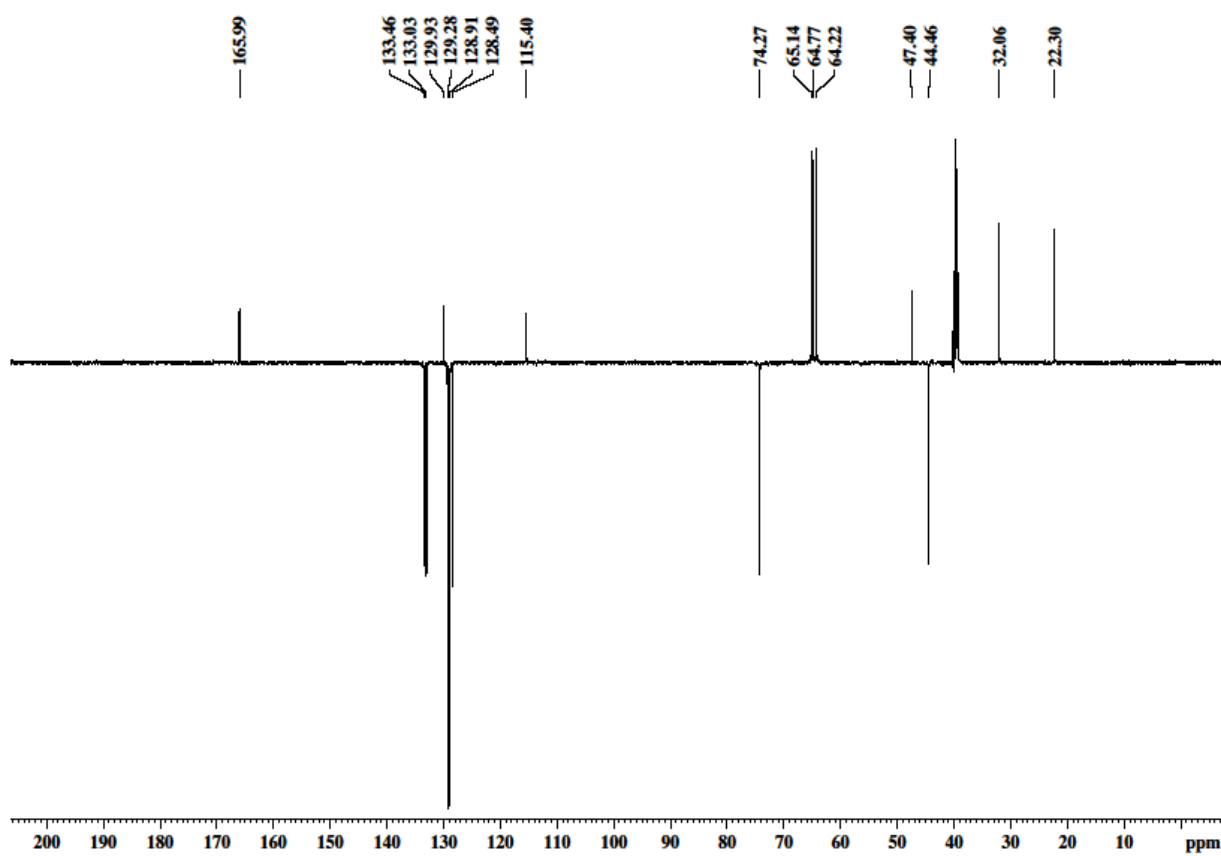

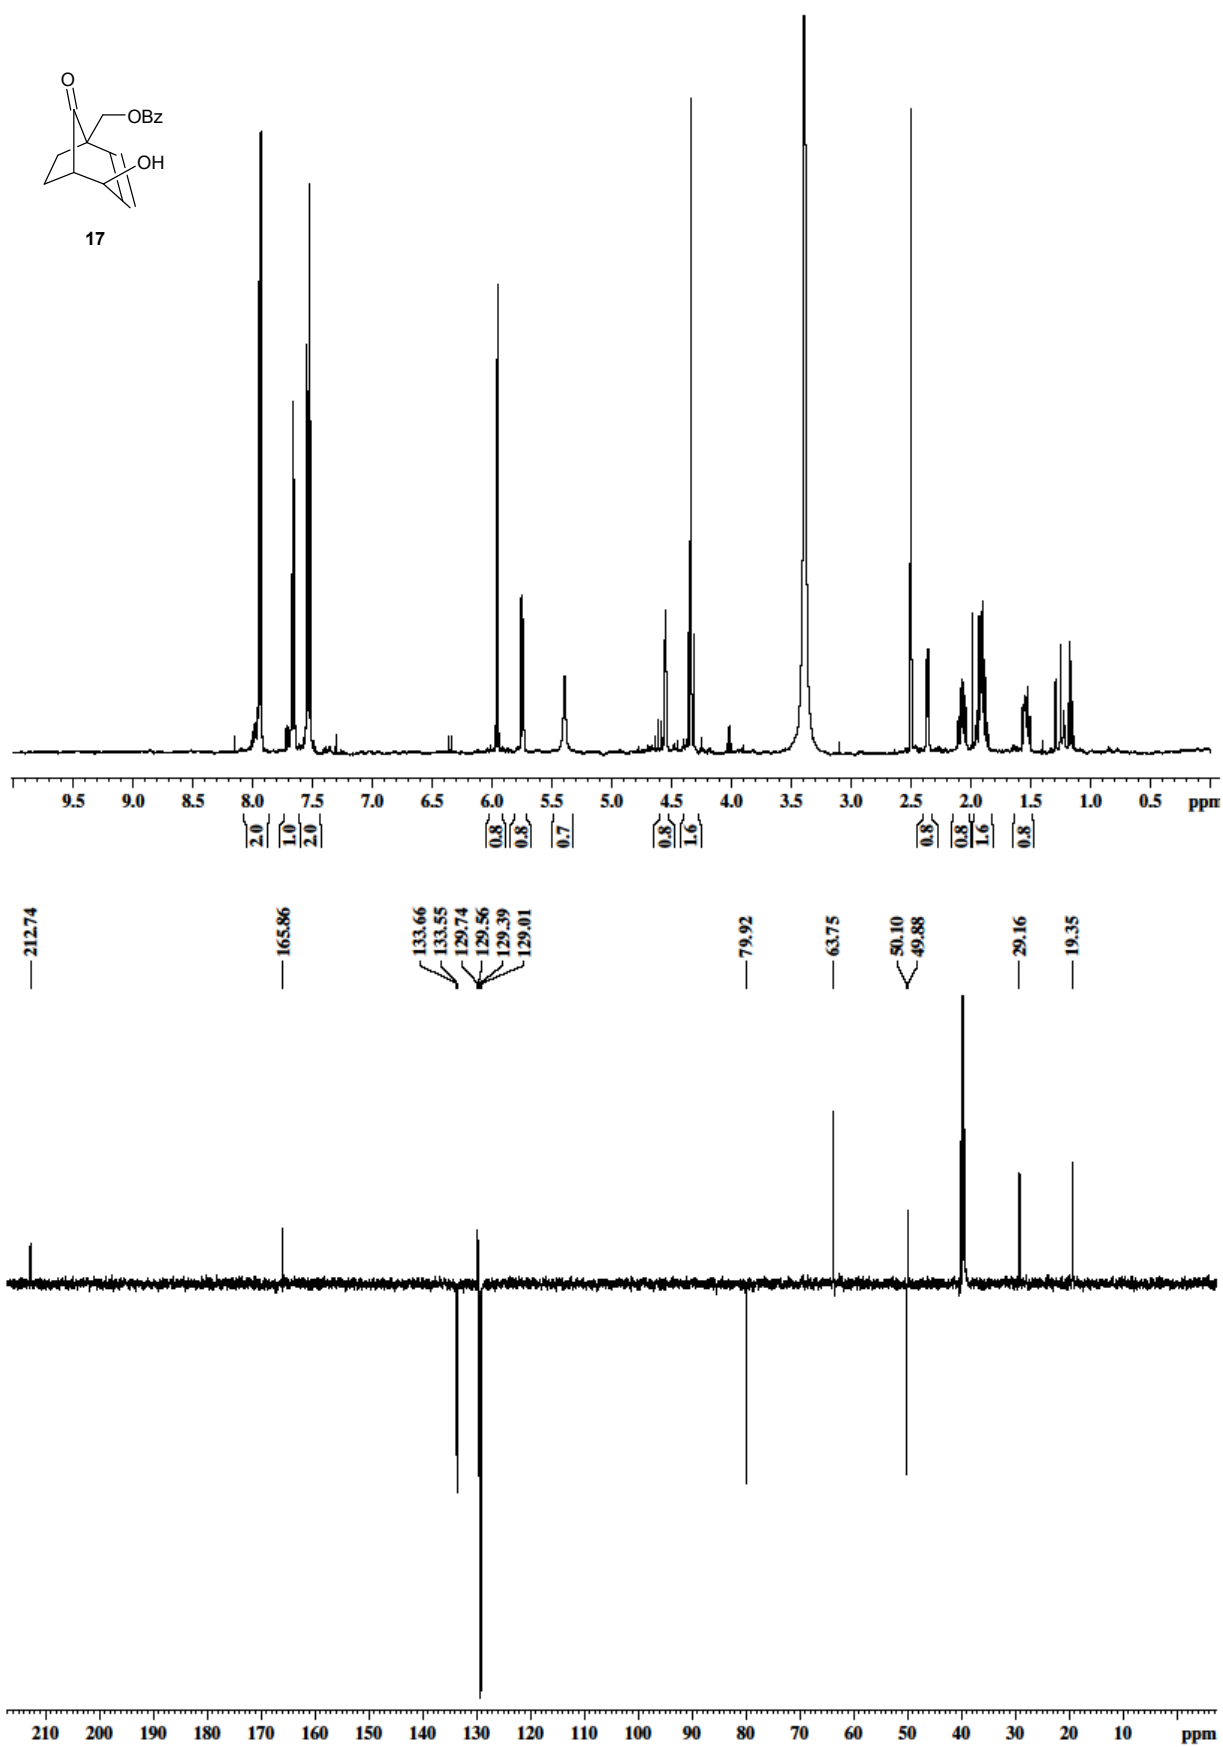

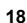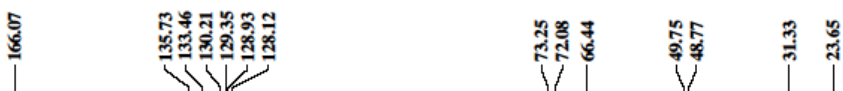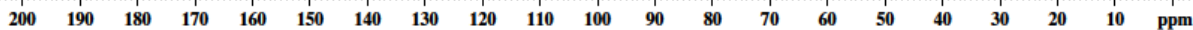

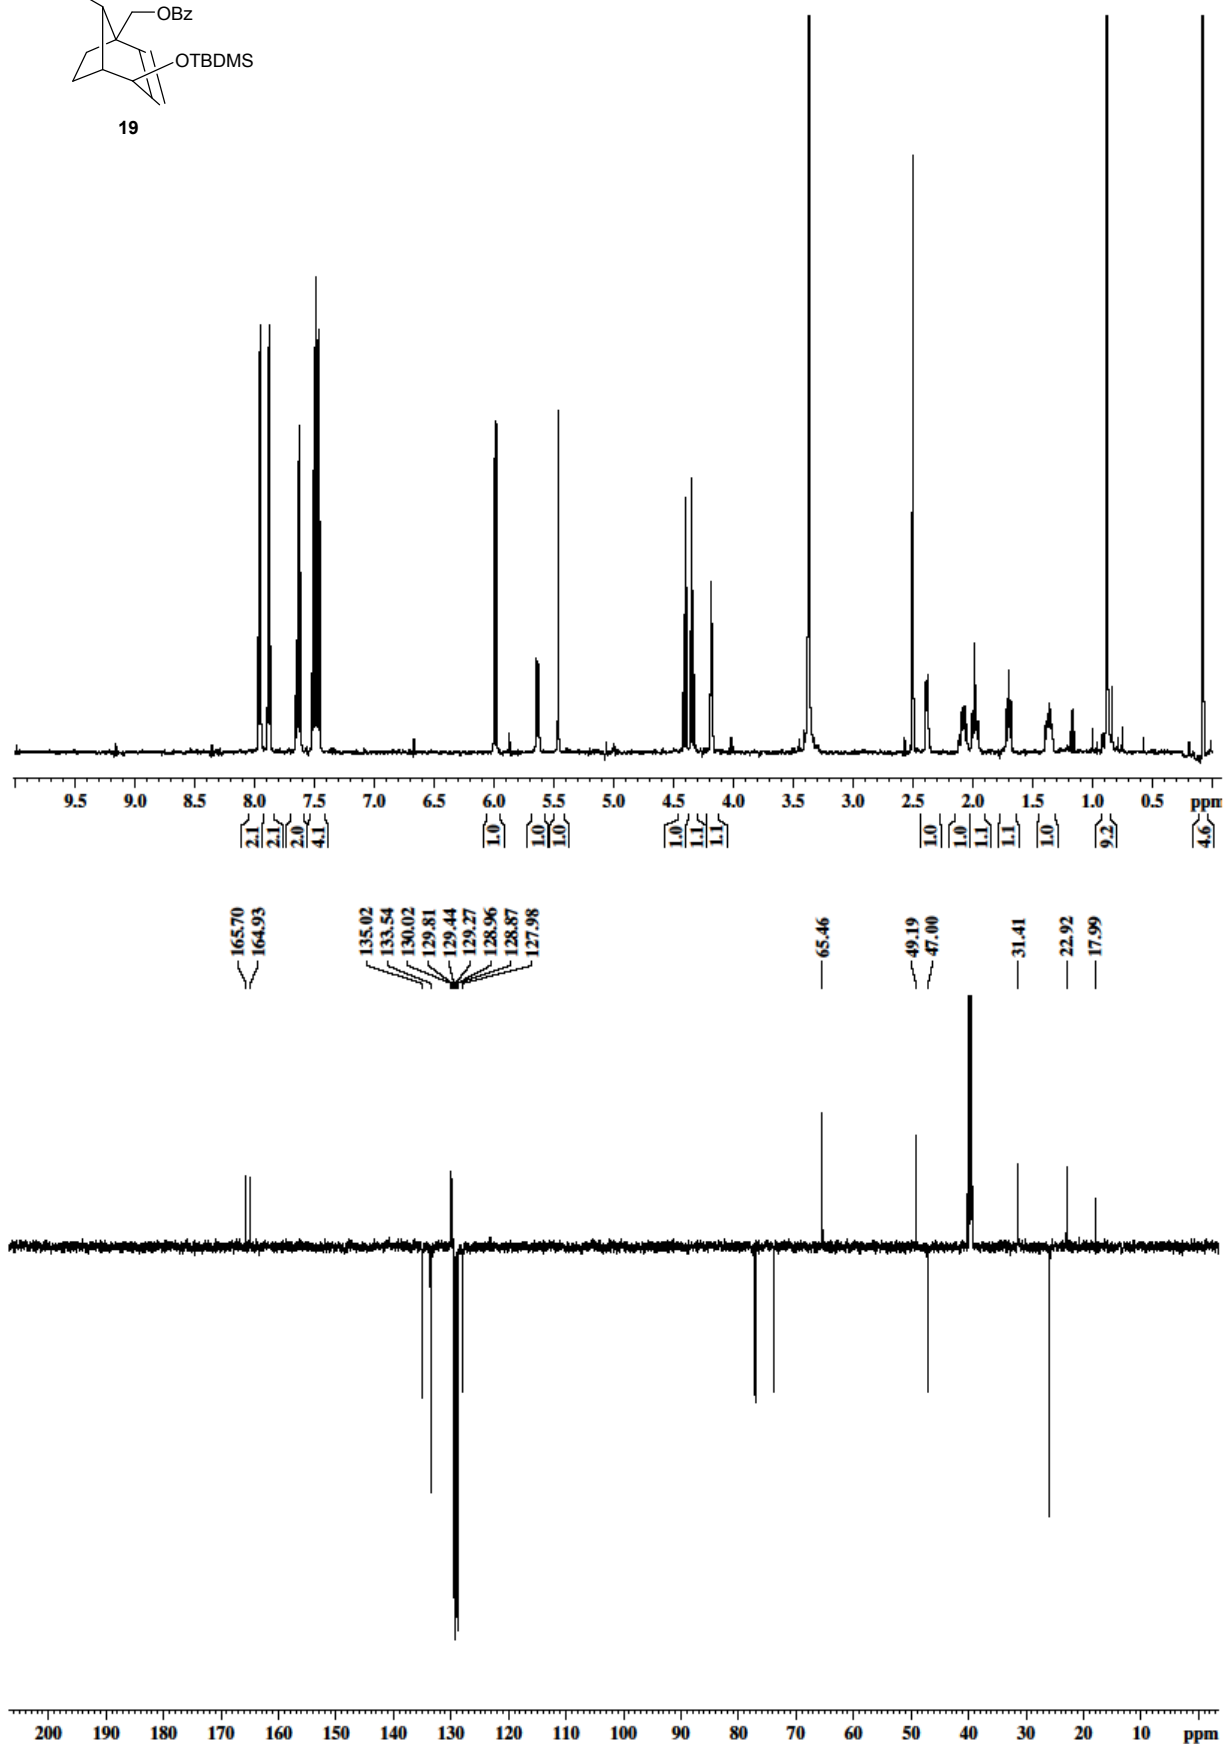



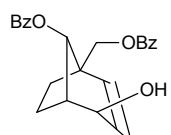

20

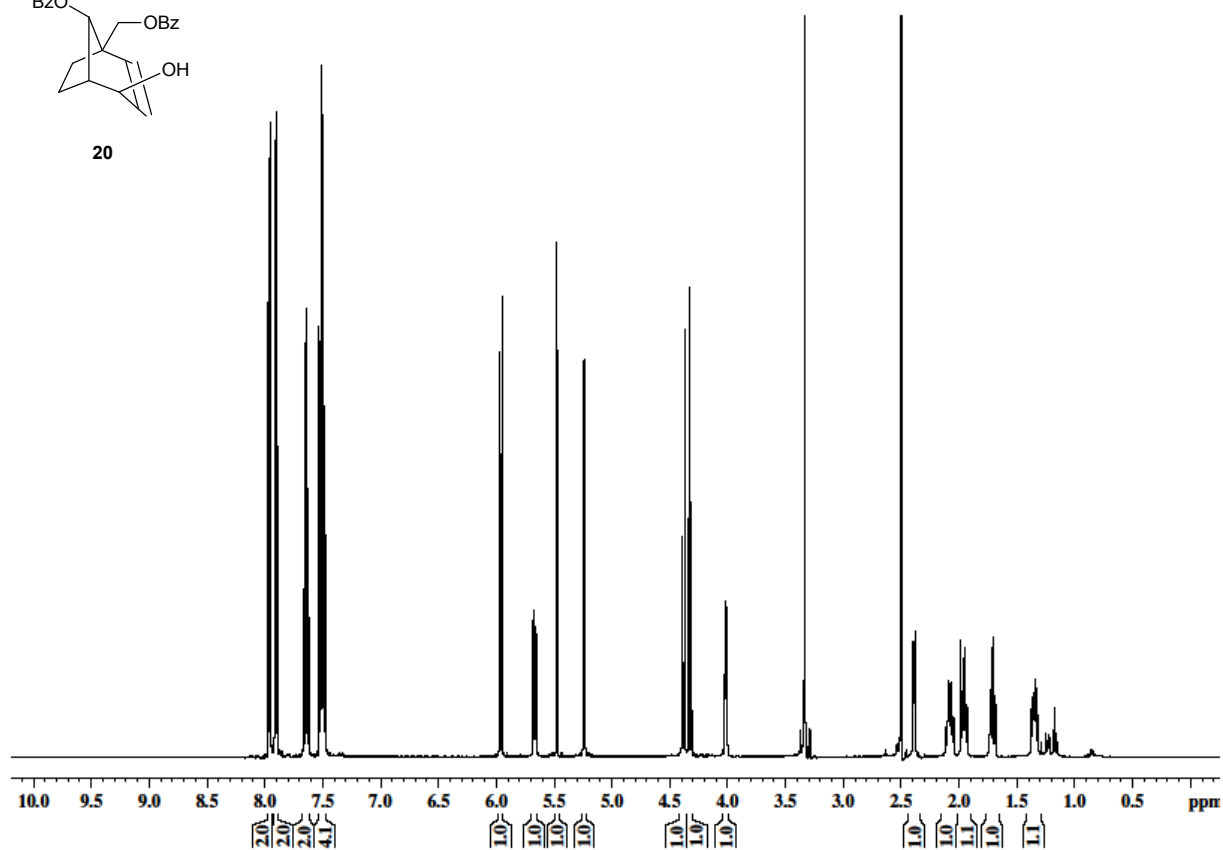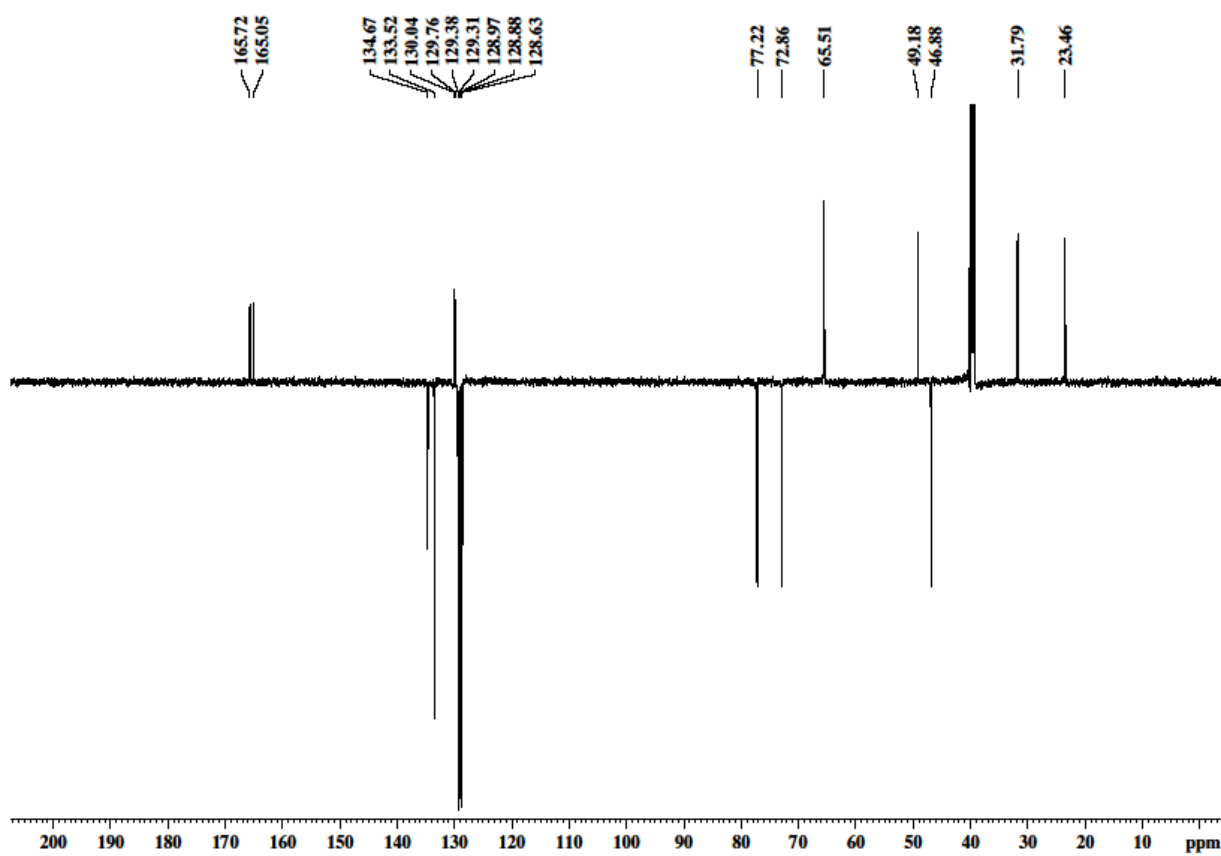

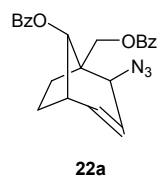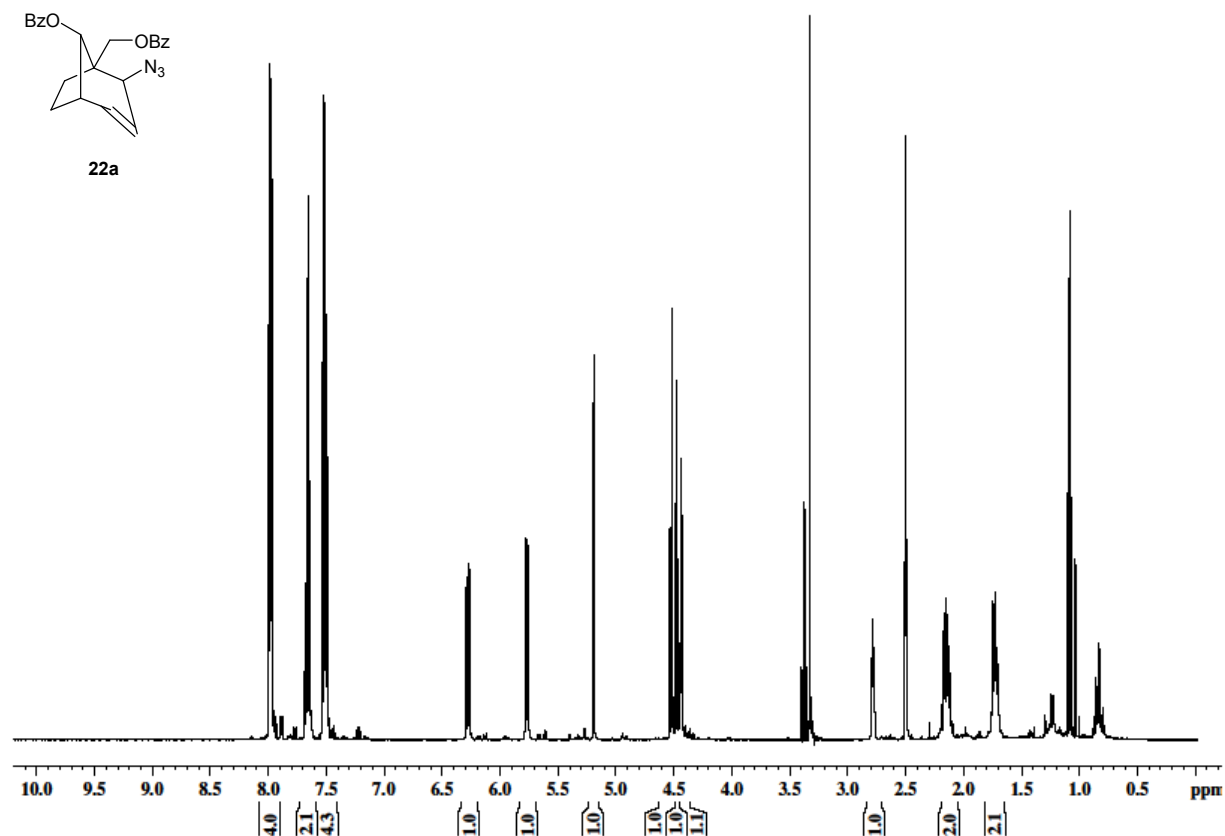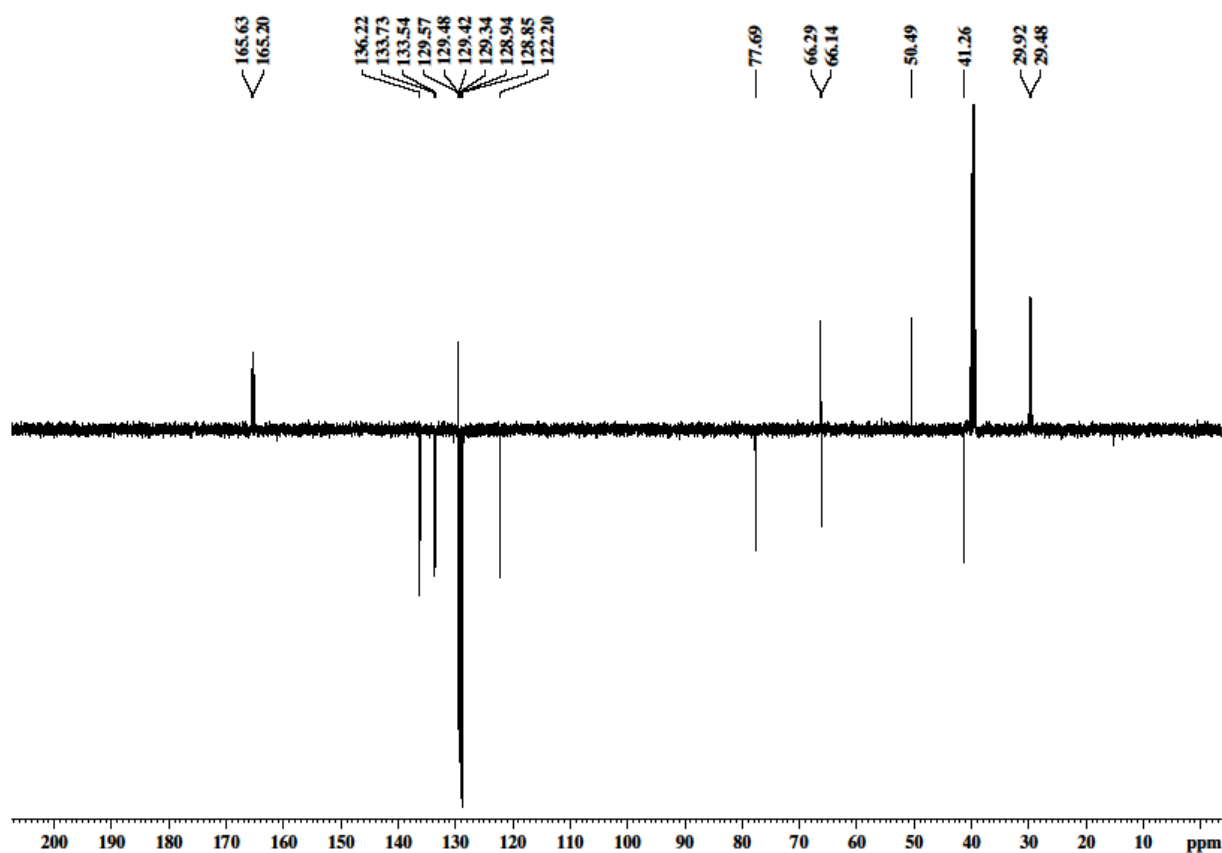

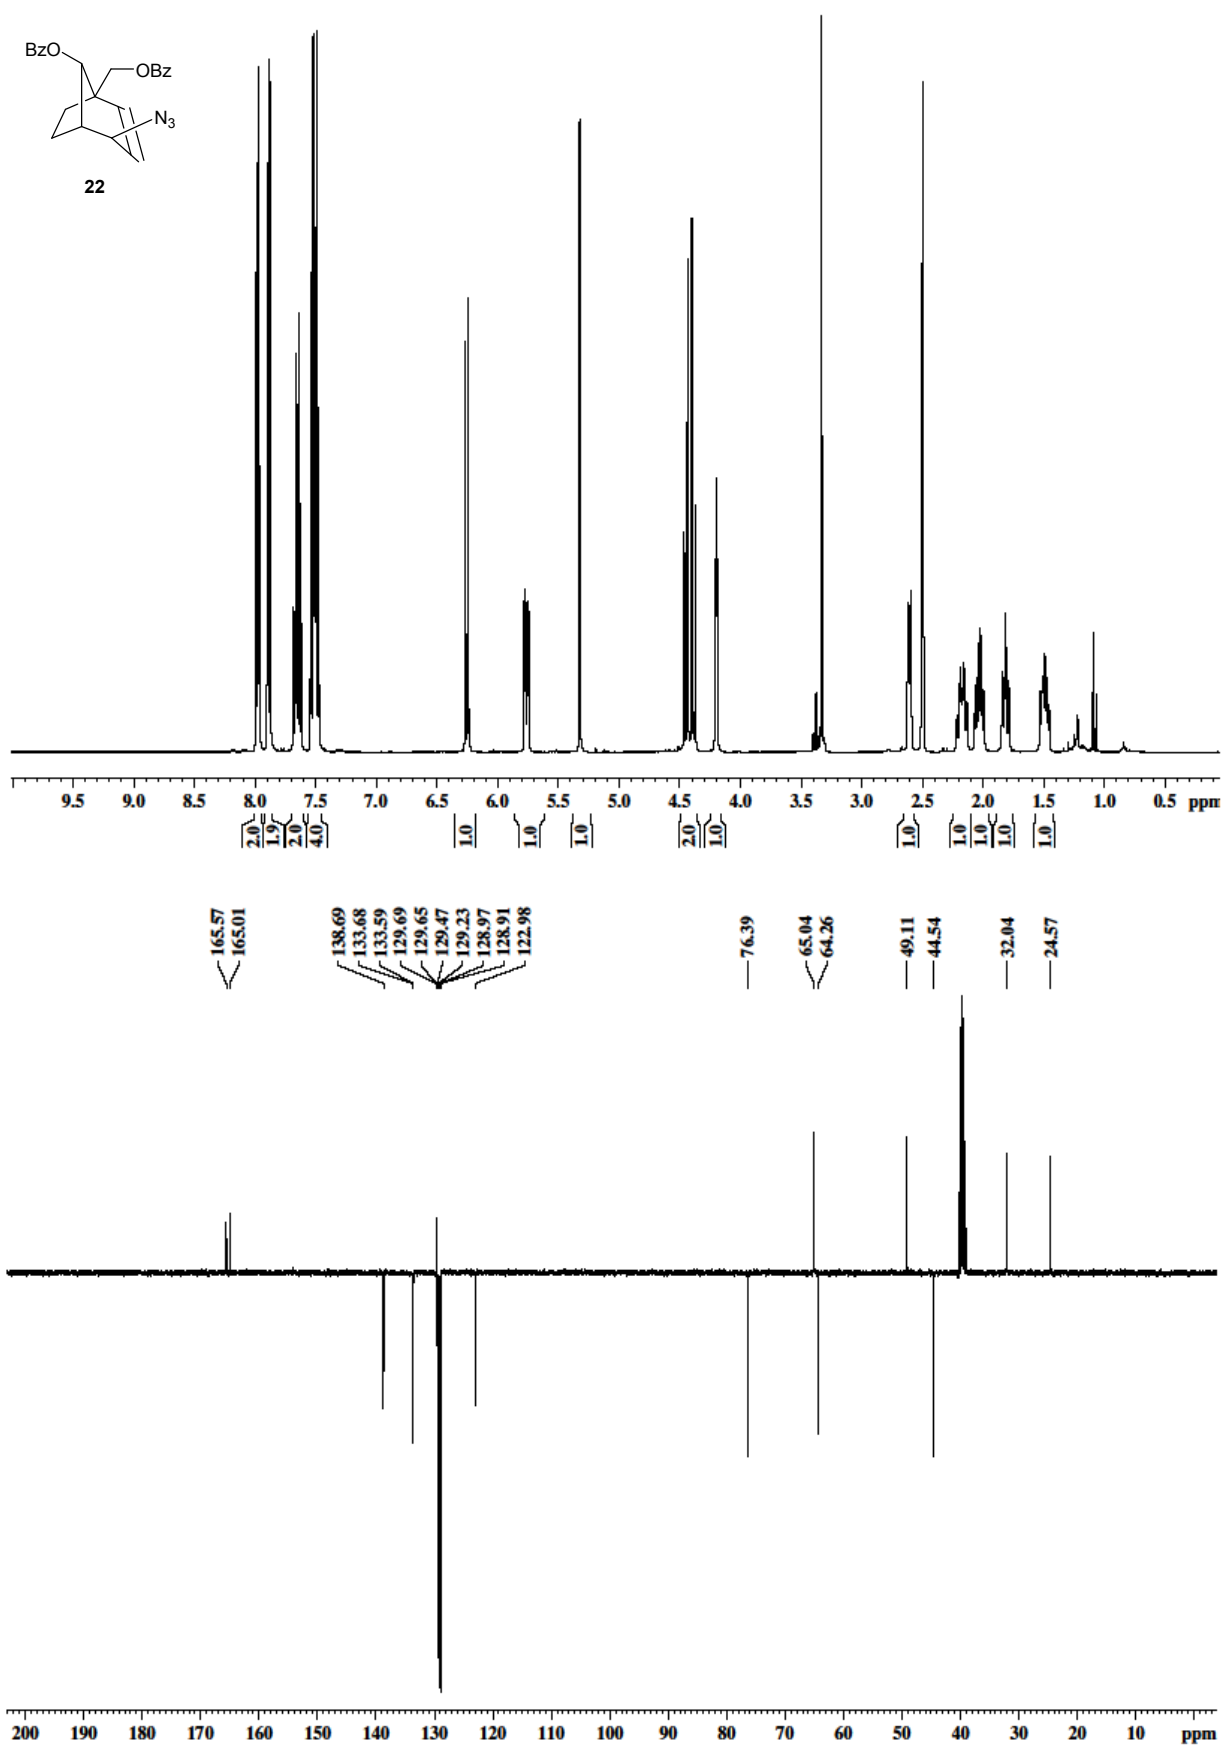

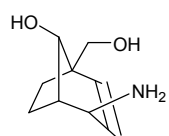

x HCl

23

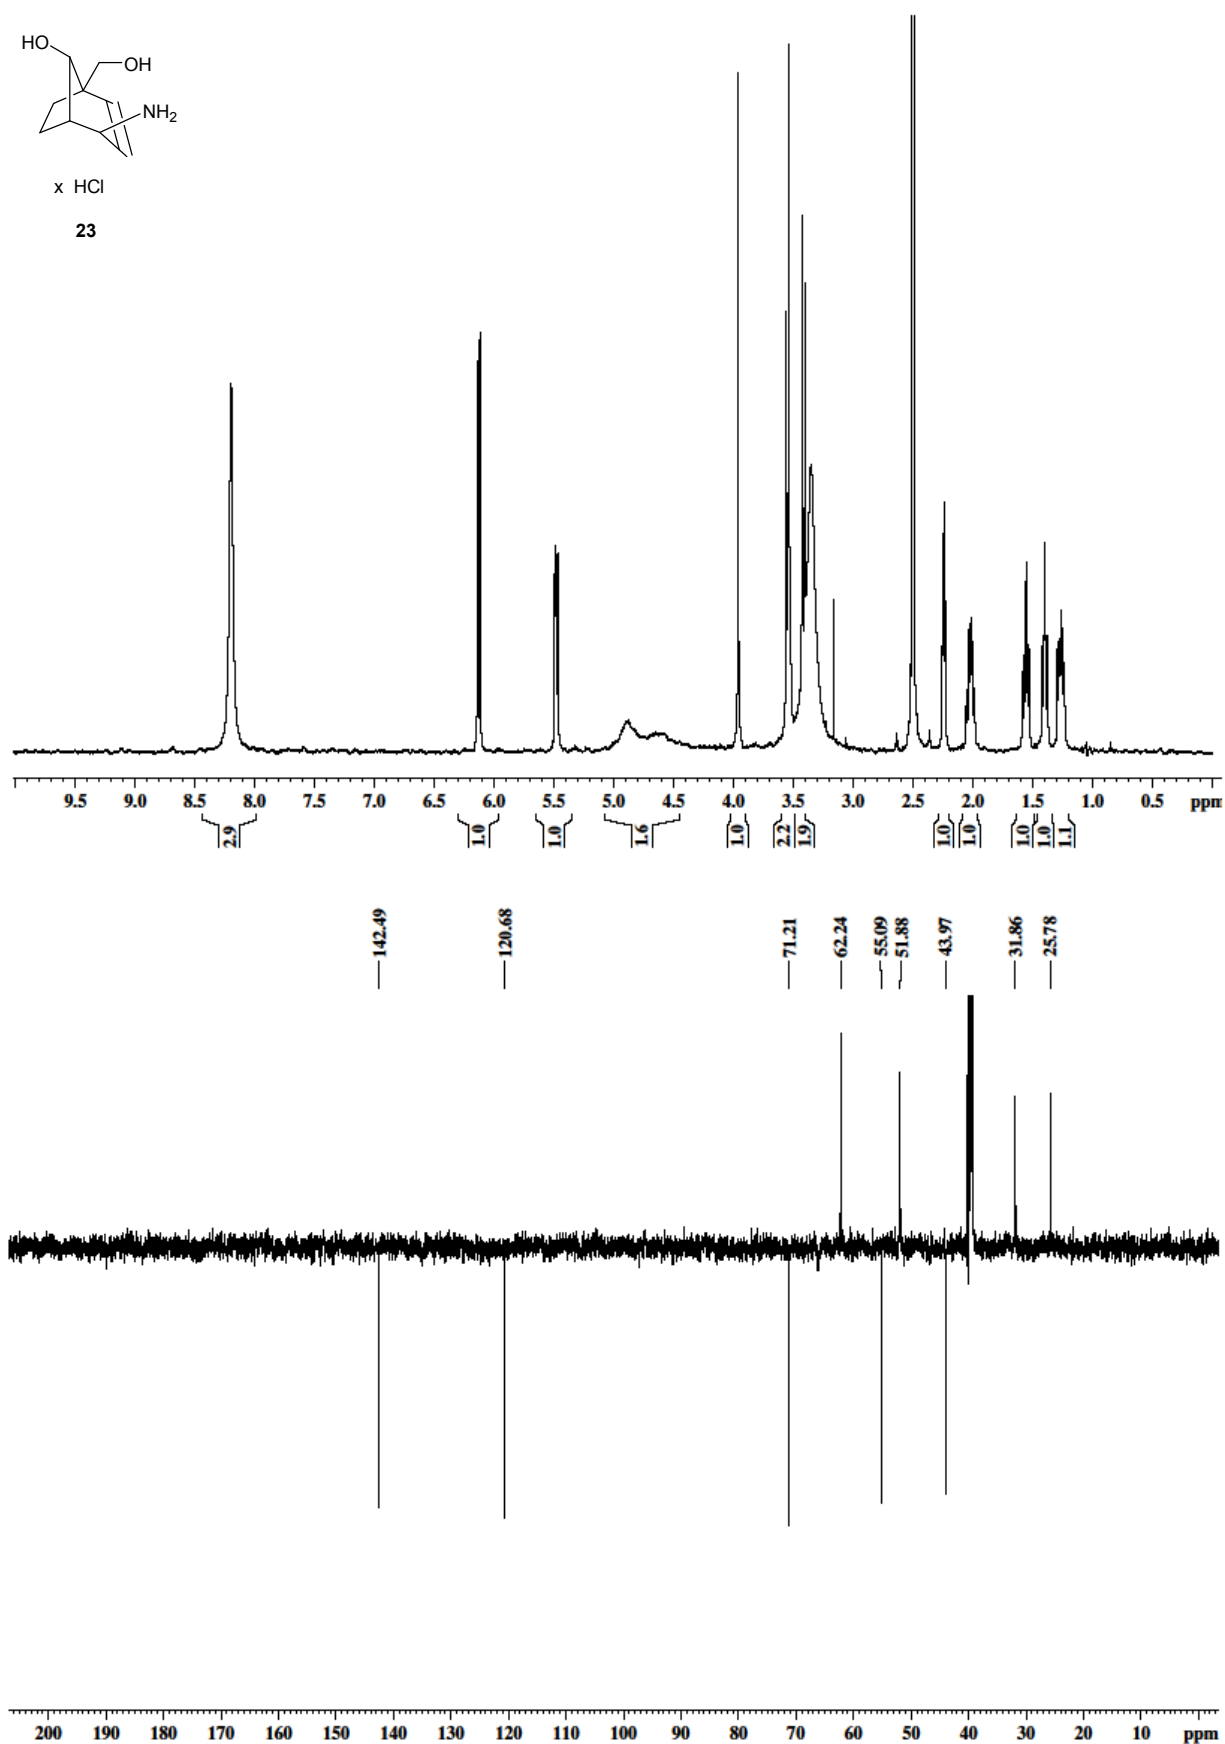

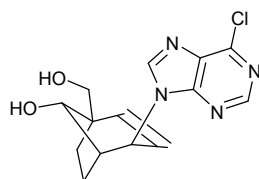

24

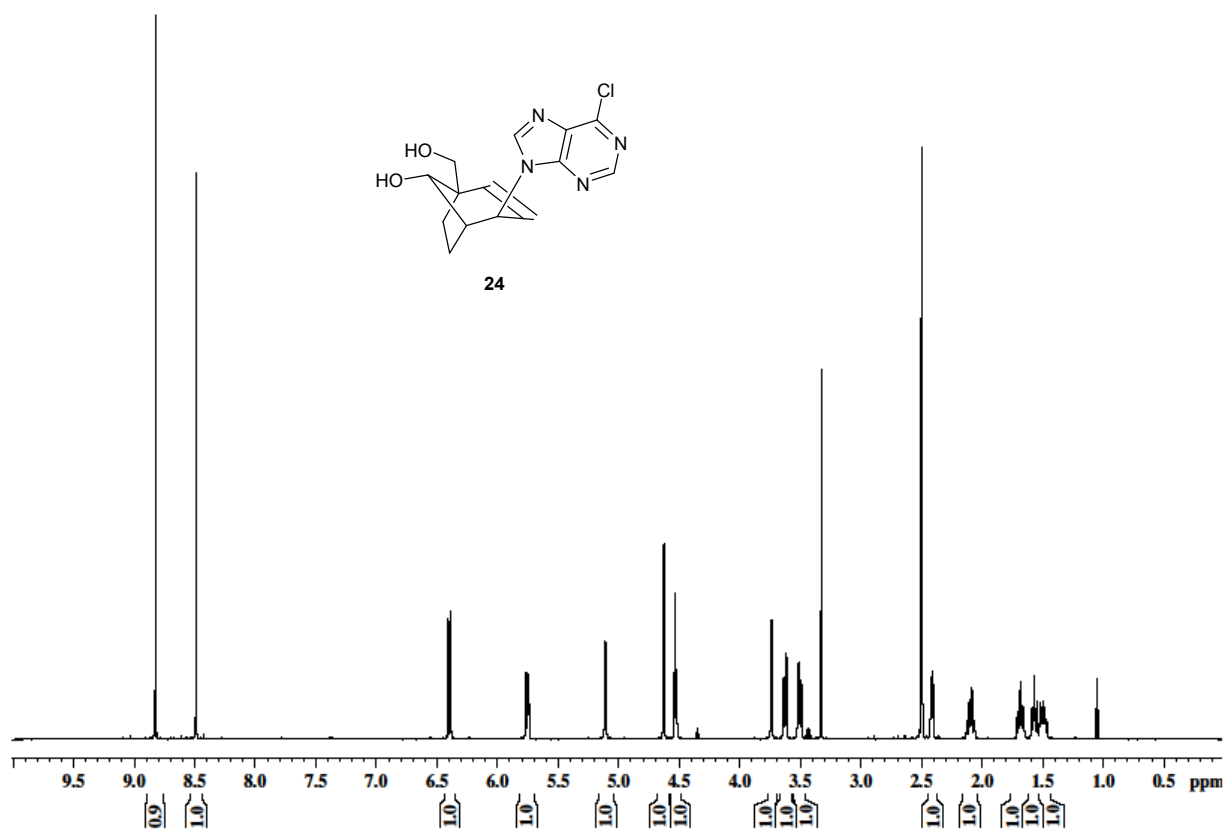

151.67  
151.48  
149.32  
145.84  
143.33  
131.47  
119.57  
71.81  
62.18  
59.74  
51.70  
46.26  
32.31  
25.10

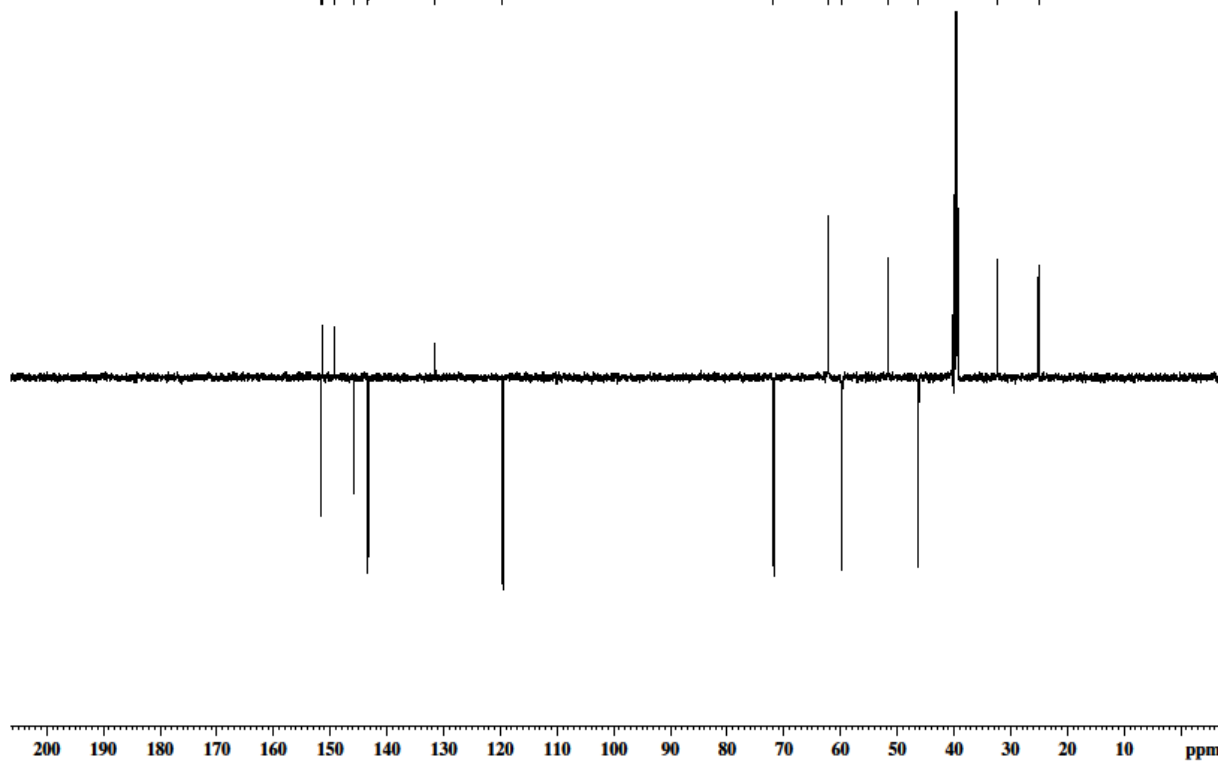

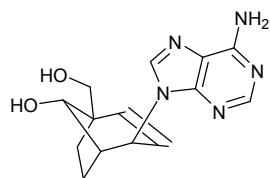

25

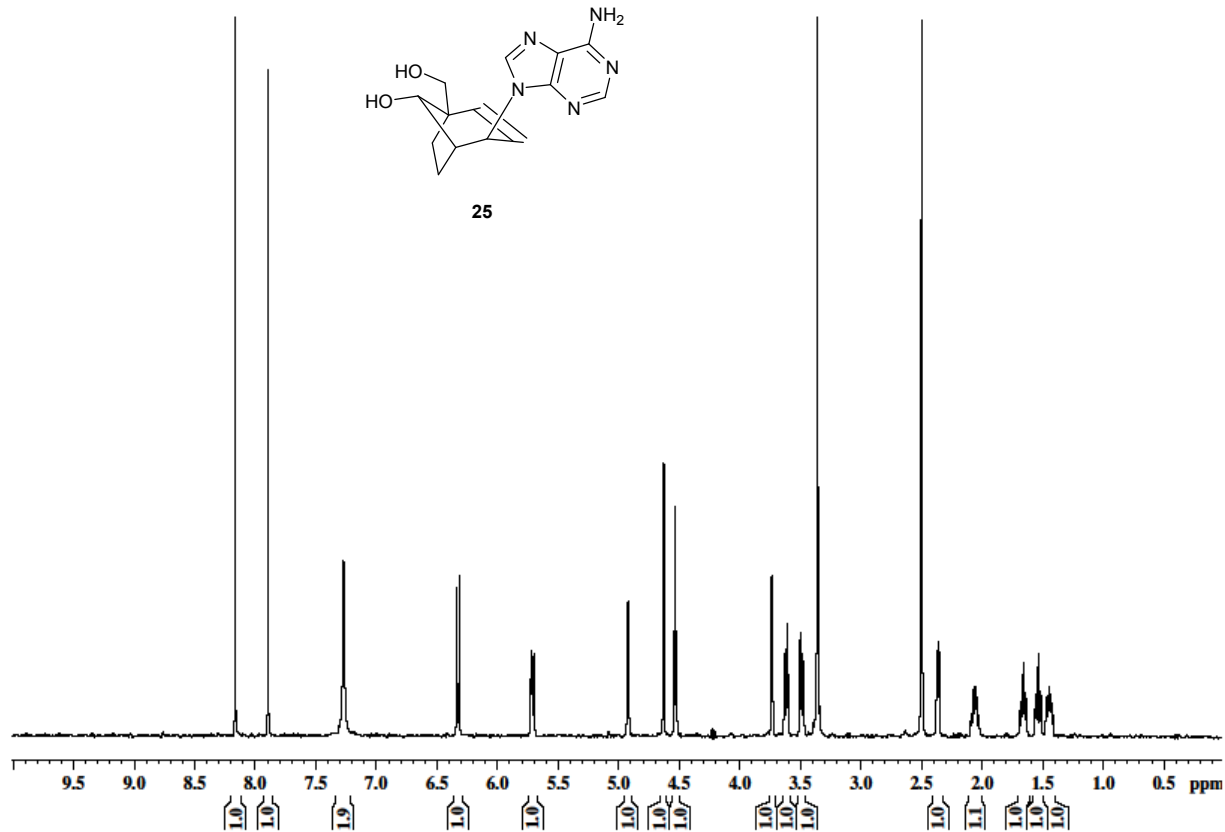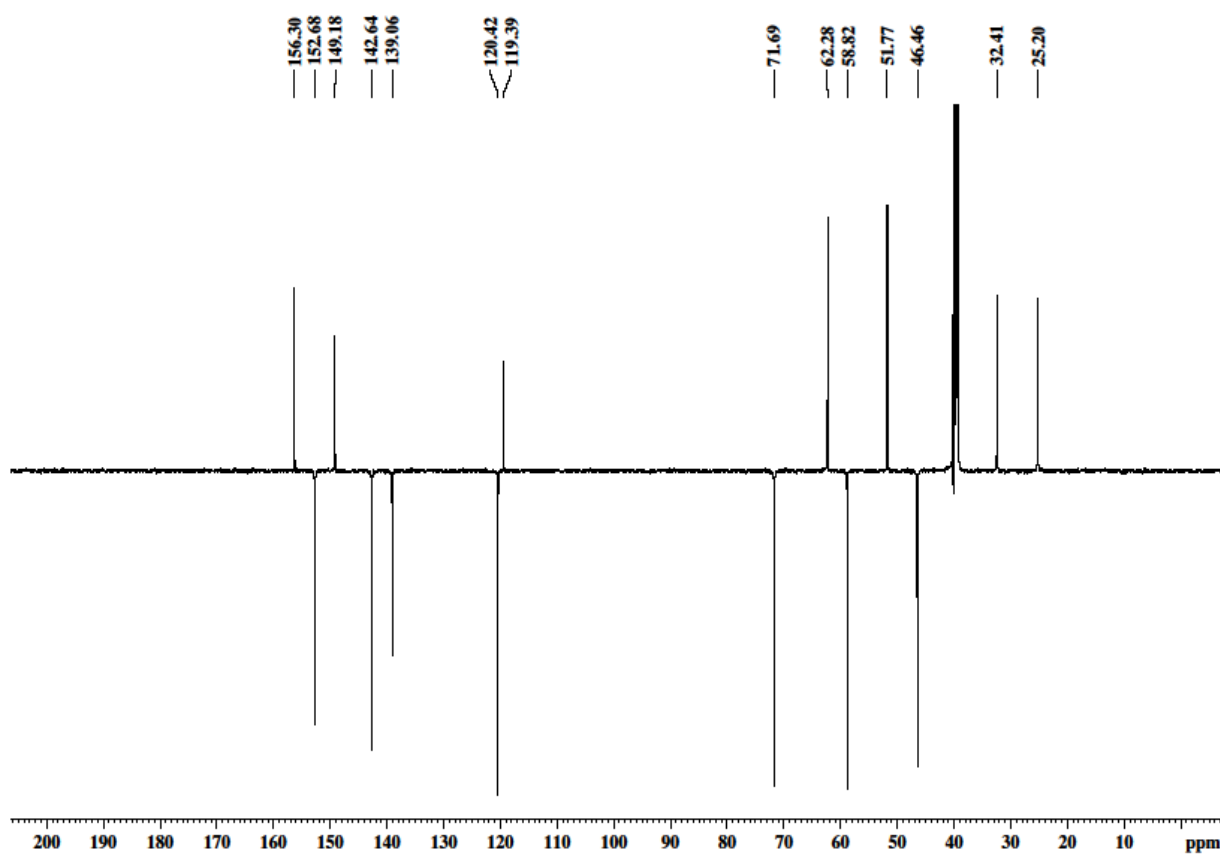

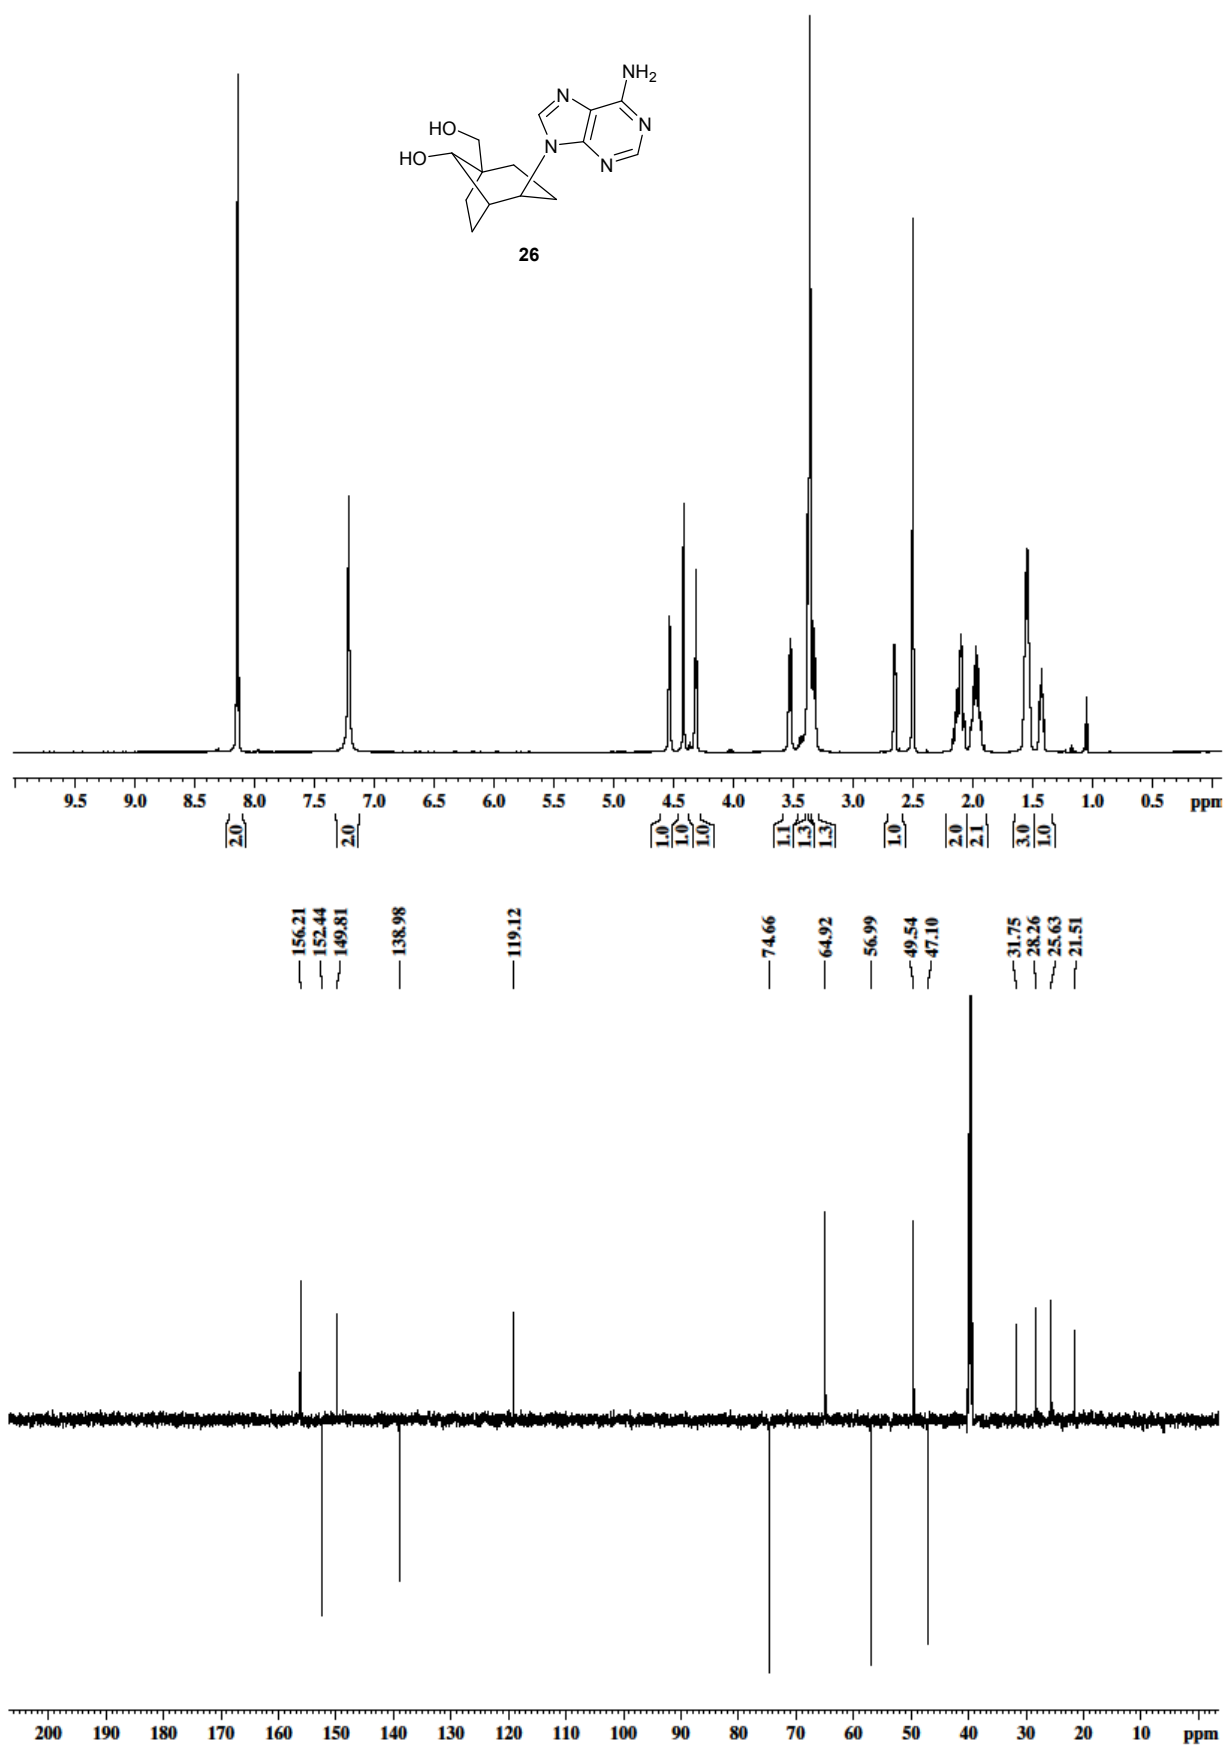

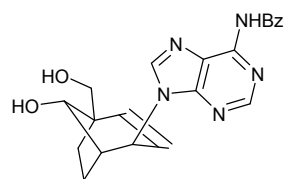

27

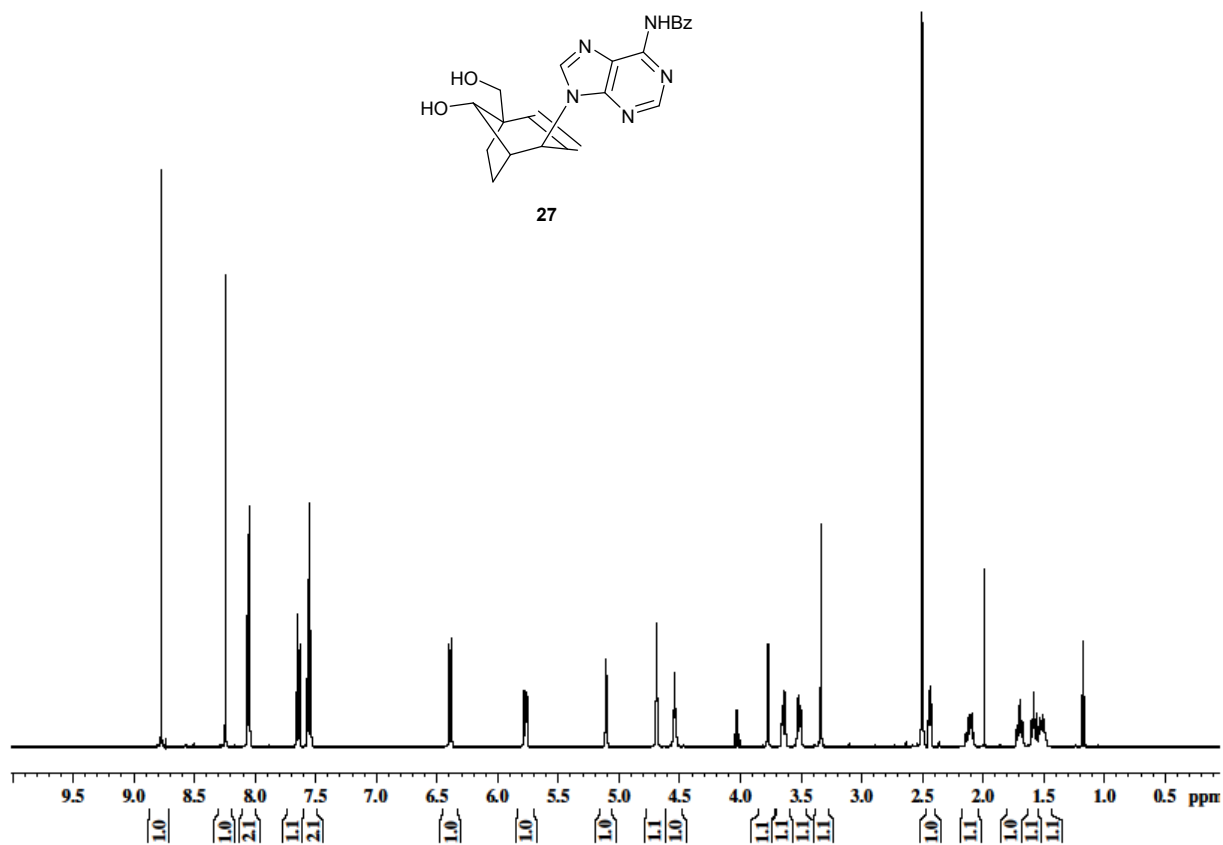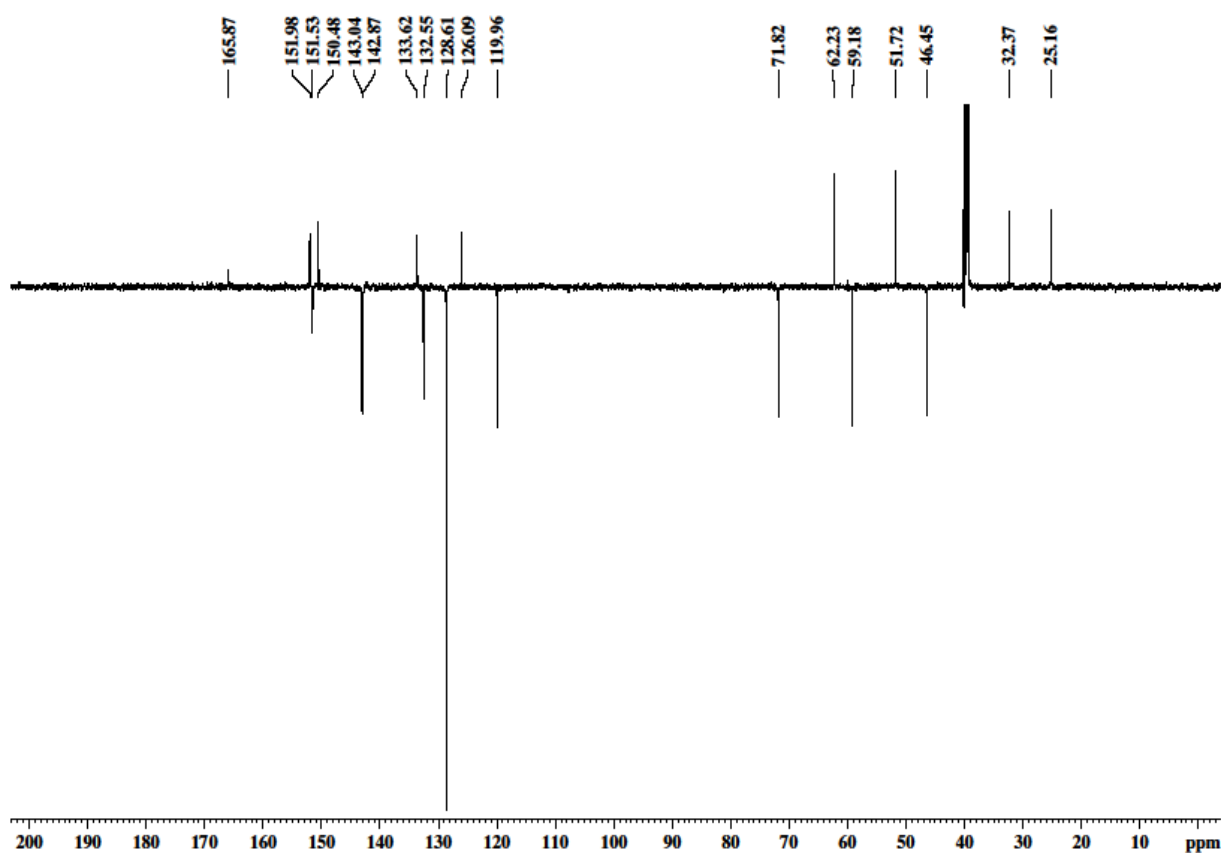



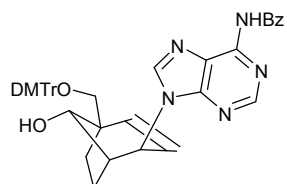

28

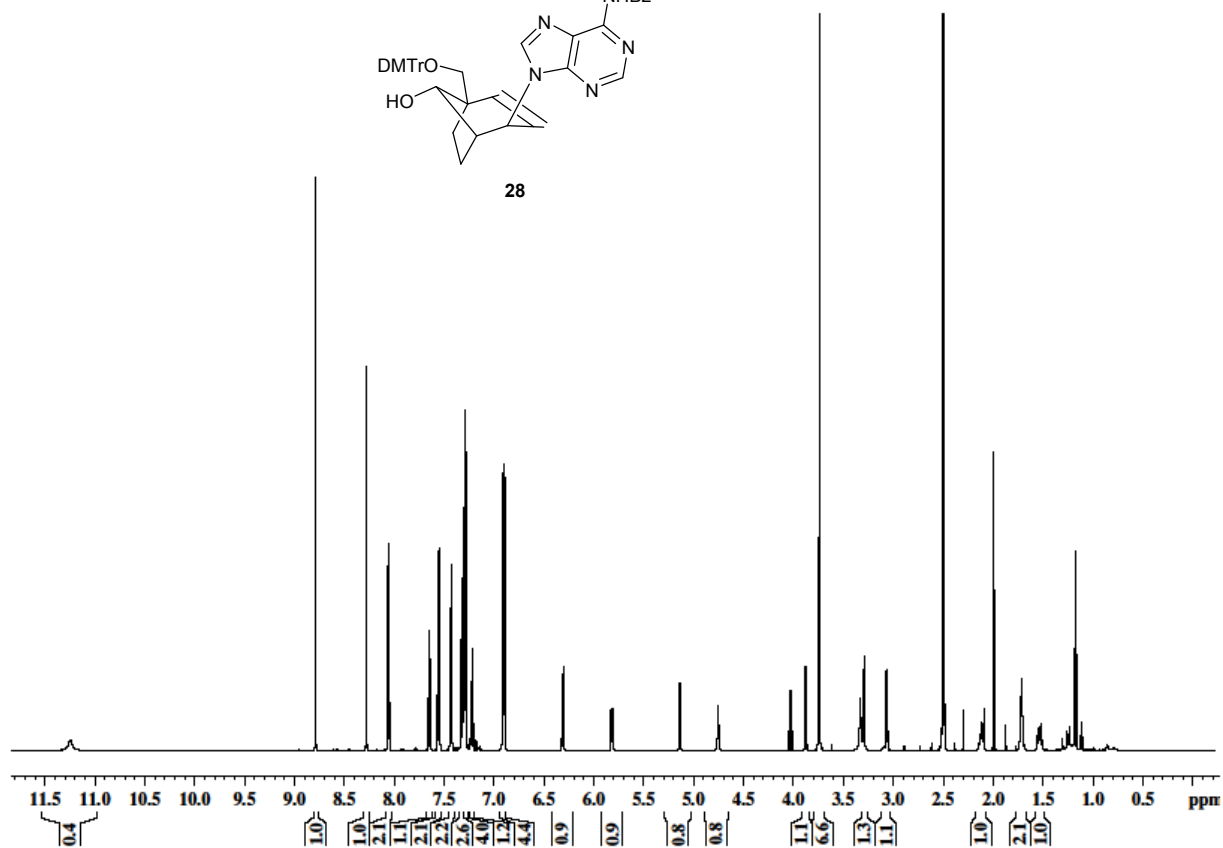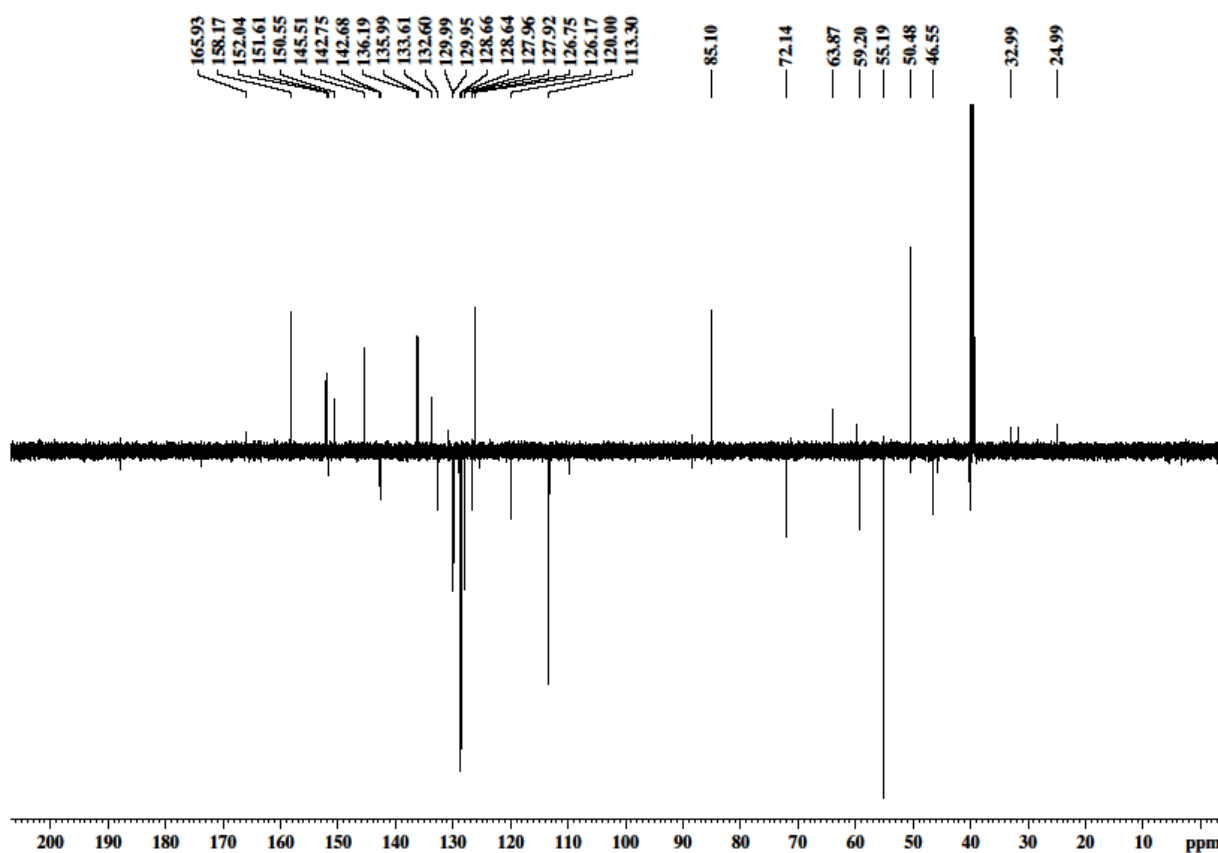

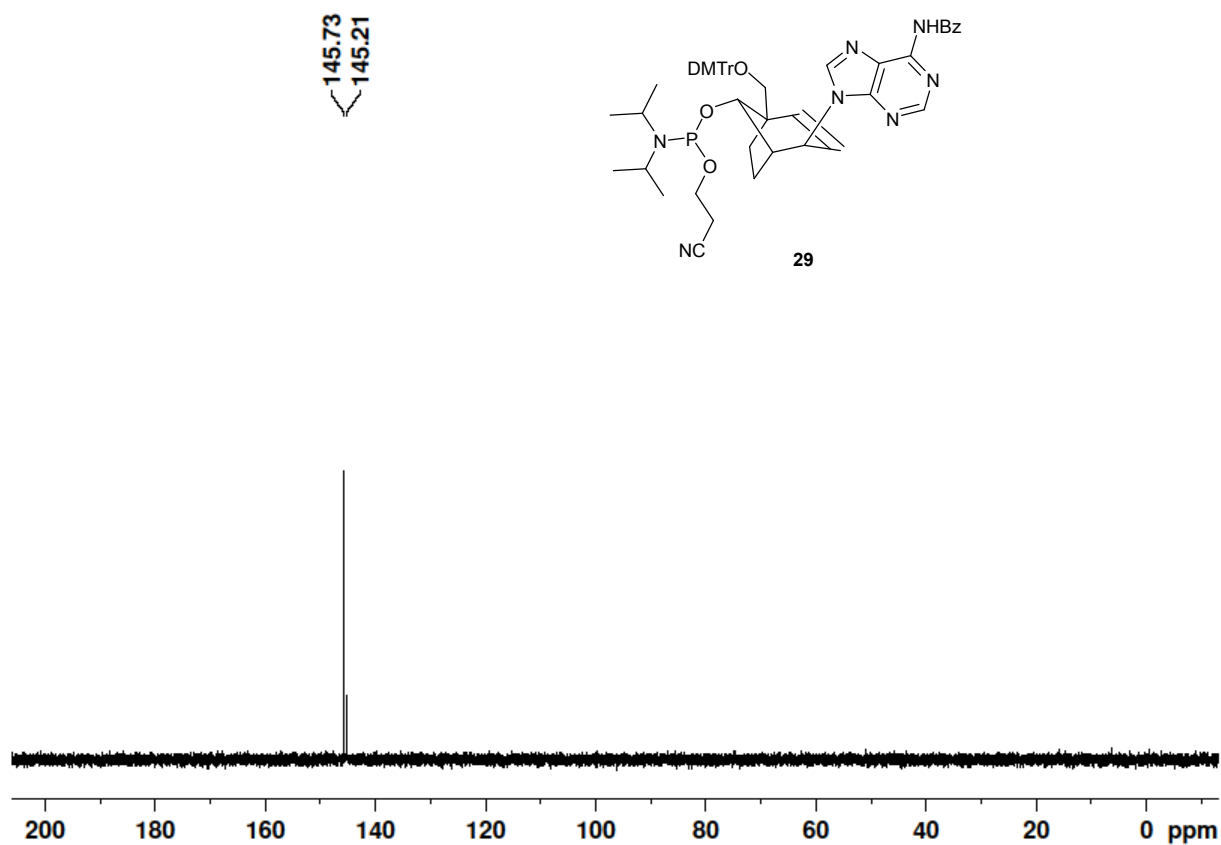

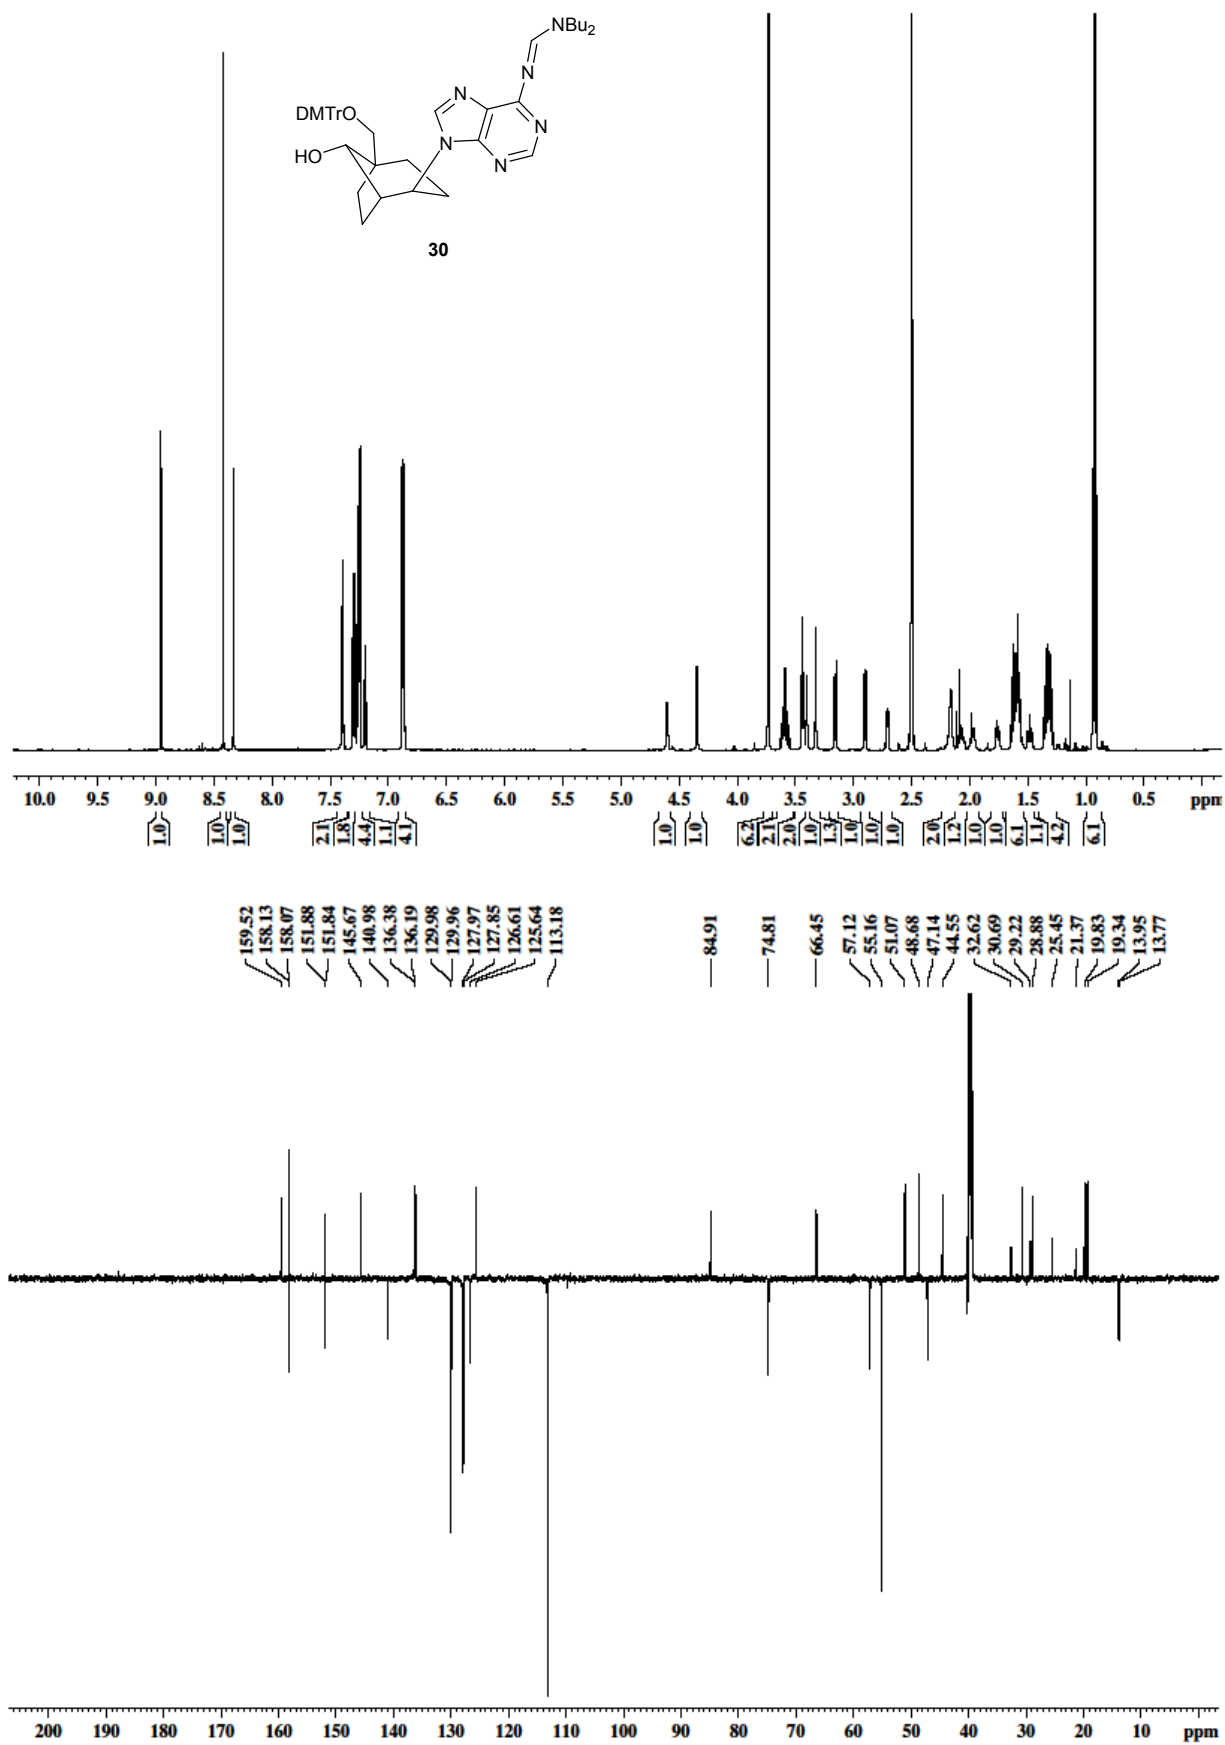

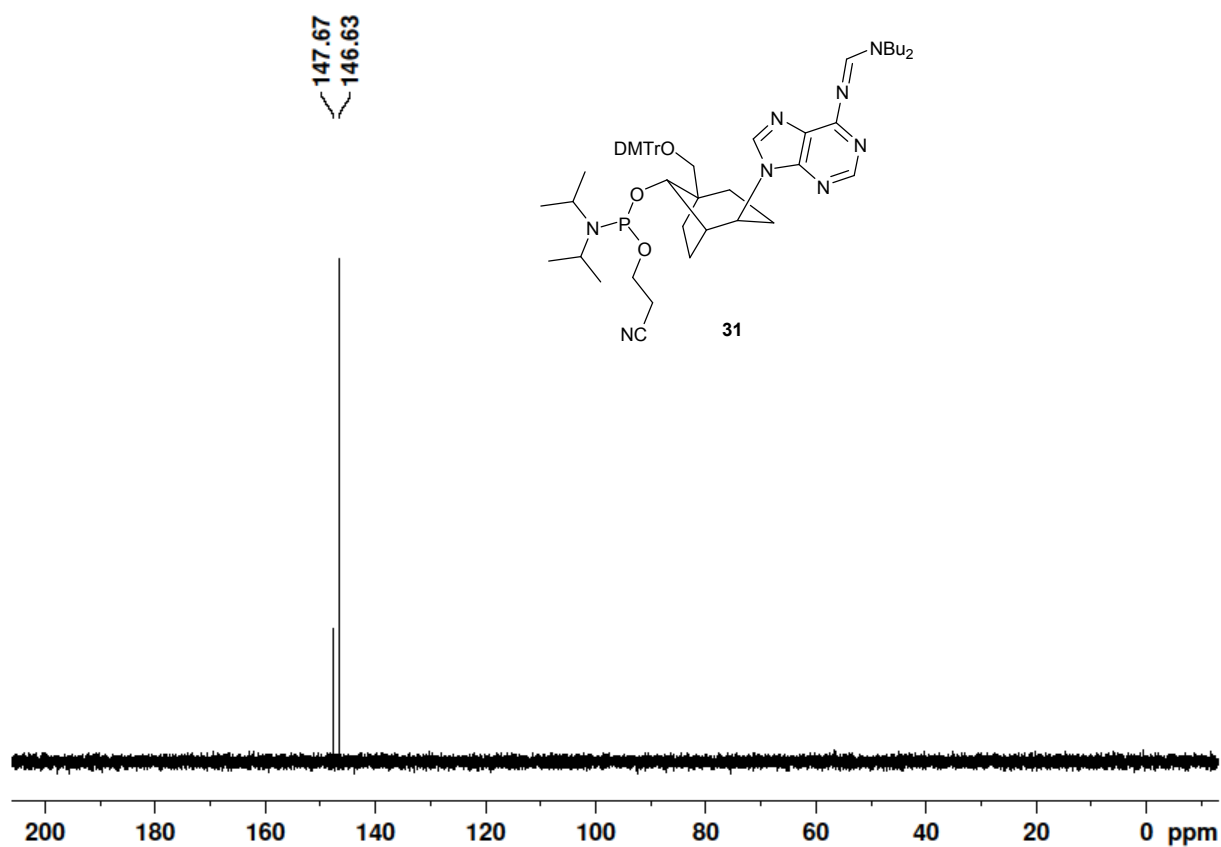

Figure S7. In contrast to the preferred conformation of cANA, LCeNA should adopt a conformation that situates the nucleobase in an “axial-like” orientation due to repulsion of the hydrogen atom of the -CH<sub>2</sub>CH<sub>2</sub>- bridge and the hydrogen atom vicinal to nucleobase

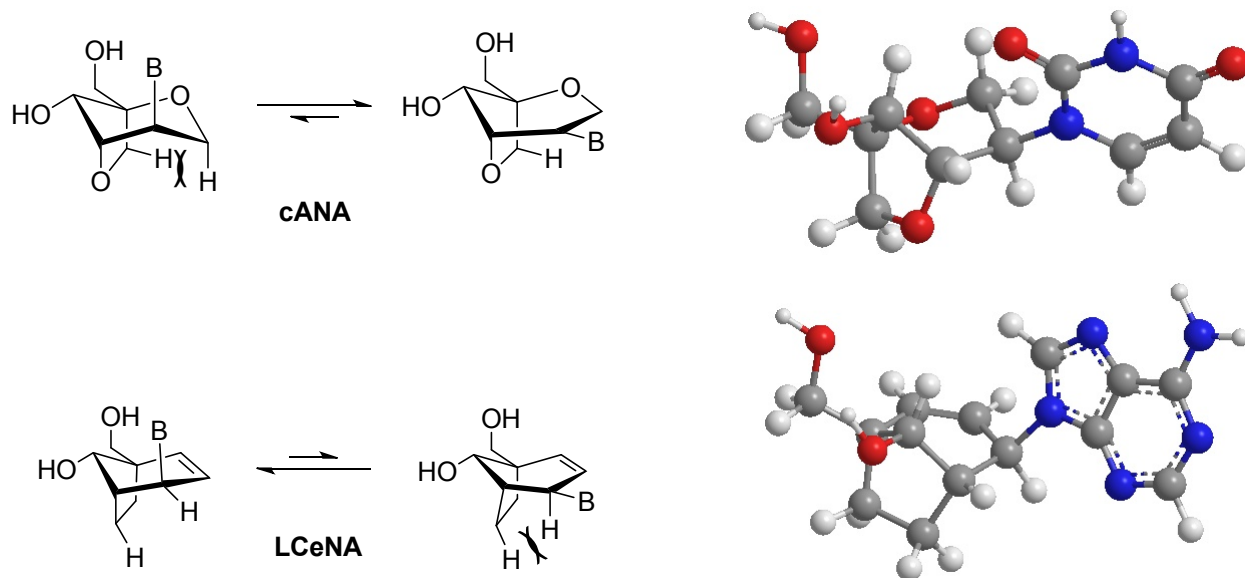

## Results of molecular dynamic calculations

The values of  $\alpha$ ,  $\gamma$ , and  $\delta$  torsion angles calculated for normal oligonucleotide and oligonucleotides including one (A5) and three (A3, A5, A8) modifications differed.

In normal chain 5'-G1-C9-3', the values of  $\alpha$  torsions for individual residues averaged employing calculated snap shot geometries ranged from 263° to 285°. The averaged  $\gamma$  torsions ranged typically from 65° to 81°, but for the G1 and C9 terminal residues it was 110° and 54°, respectively. The overall values of  $\alpha$  and  $\gamma$  torsions were typically ~280° and ~70°, except shortly lasting and rarely occurring concerted  $\alpha$ - $\gamma$  switches when  $\alpha/\gamma$  values ~280°/~70° changed to ~150°/~190° (Figure S7). The averaged  $\delta$  torsion ranged for most of residues from 78° to 82°. However, when  $\delta$  close to ~120° for some period occurred (A8 residue) or  $\delta$  fluctuating fast between ~80° and ~120° occurred (C9 terminal residue) the averaged  $\delta$  torsion value was 106° and 120°, respectively. The typical values of  $\alpha$ ,  $\gamma$ , and  $\delta$  torsion angles calculated for normal 5'-G1-C9-3' chain were characteristic values indicating normal A-RNA structural class of RNA oligonucleotide<sup>3</sup>.

In 5'-G1-C9-3' chain containing one modified residue A5, the averaged value of  $\alpha$ ,  $\gamma$ , and  $\delta$  torsion calculated for A5 residue was 240°, 63°, and 54°, respectively. The distribution of  $\alpha$  values in modified A5 was significantly broader and the averaged  $\alpha$  value smaller compared to normal A5 residue (Figure S13). The modified A5 residue possessed also one other distinguishable feature; the averaged value of  $\gamma$  torsion (63°) was larger than averaged value of  $\delta$  torsion (55°) while in normal residues was  $\delta$  larger than  $\gamma$  torsion. The structure of U4 and U6 residues neighboring to modified A5 residue was largely perturbed, namely owing to frequent occurrence of the  $\alpha/\gamma$  switches (Figure S7). The distributions calculated for  $\alpha$  torsion in U4, U6 and C7 residues are bi- or even tri-modal while  $\alpha$  torsions in normal chain typically possessed single-mode distribution centered at ~280° (Figure S13). The A5 modification thus introduced structural disorder particularly to the neighboring residues while the modified residue itself was structurally rigid and abnormal compared to regular residues in normal RNA oligonucleotides.

The values of  $\alpha$ ,  $\gamma$ , and  $\delta$  torsion calculated for modified A3, A5 and A8 residues in 5'-G1-C9-3' chain containing the three modifications were again characteristic. The averaged value of  $\alpha$  torsion for A3, A5 and A8 modified residue was 268°, 245°, and 240°, respectively. The distributions of  $\alpha$  torsions for three modified residues broadened compared

to those for normal residues (Figure **S13**). The averaged values of  $\delta$  torsions calculated for A3, A5 and A8 modified residues 52°, 55°, 55° were smaller than the averaged values of  $\gamma$  torsions 56°, 63°, 64°. All the three modified residues were structurally more rigid and abnormal compared to normal residues. The structural disorder of normal residues neighboring to the modified residues was large. Notably, the fast and concerted fluctuations of  $\alpha$  and  $\gamma$  torsions were calculated particularly for normal U6 residue (Figure **S8**). We therefore assume that structural disorder/instability of normal residues introduced by modifications may be cumulative for some residues that may depend on sequential positioning of modifications.

Figure S8.

Alpha, gamma and delta torsions of the studied chain without modifications

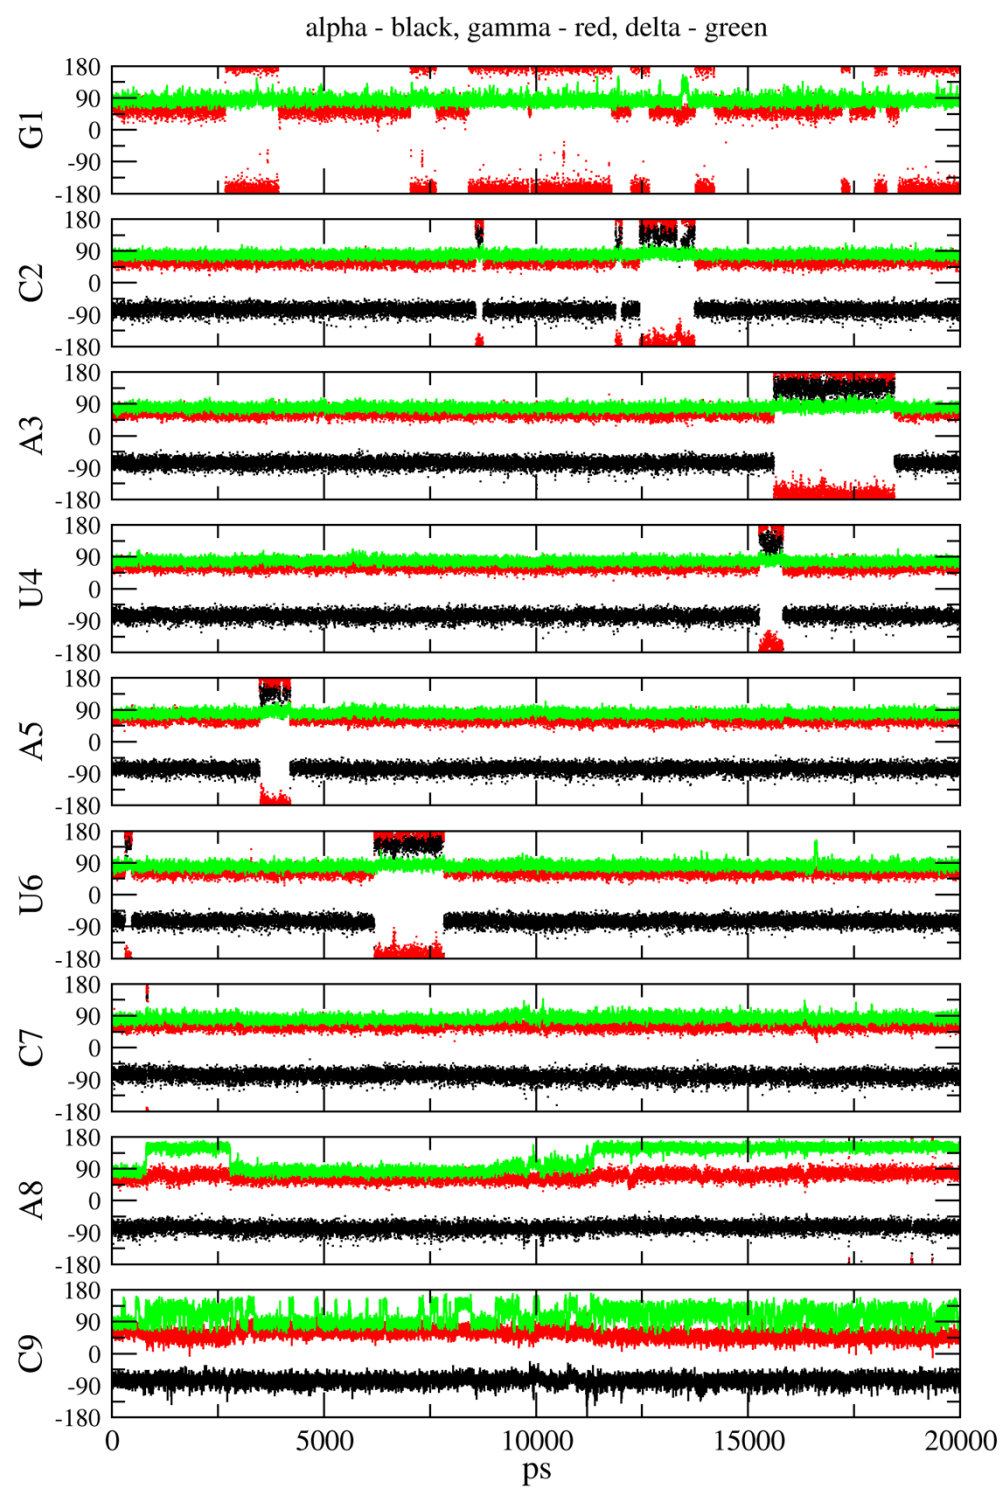



Figure S9.

Alpha, gamma and delta torsions of studied chain with 1 modification

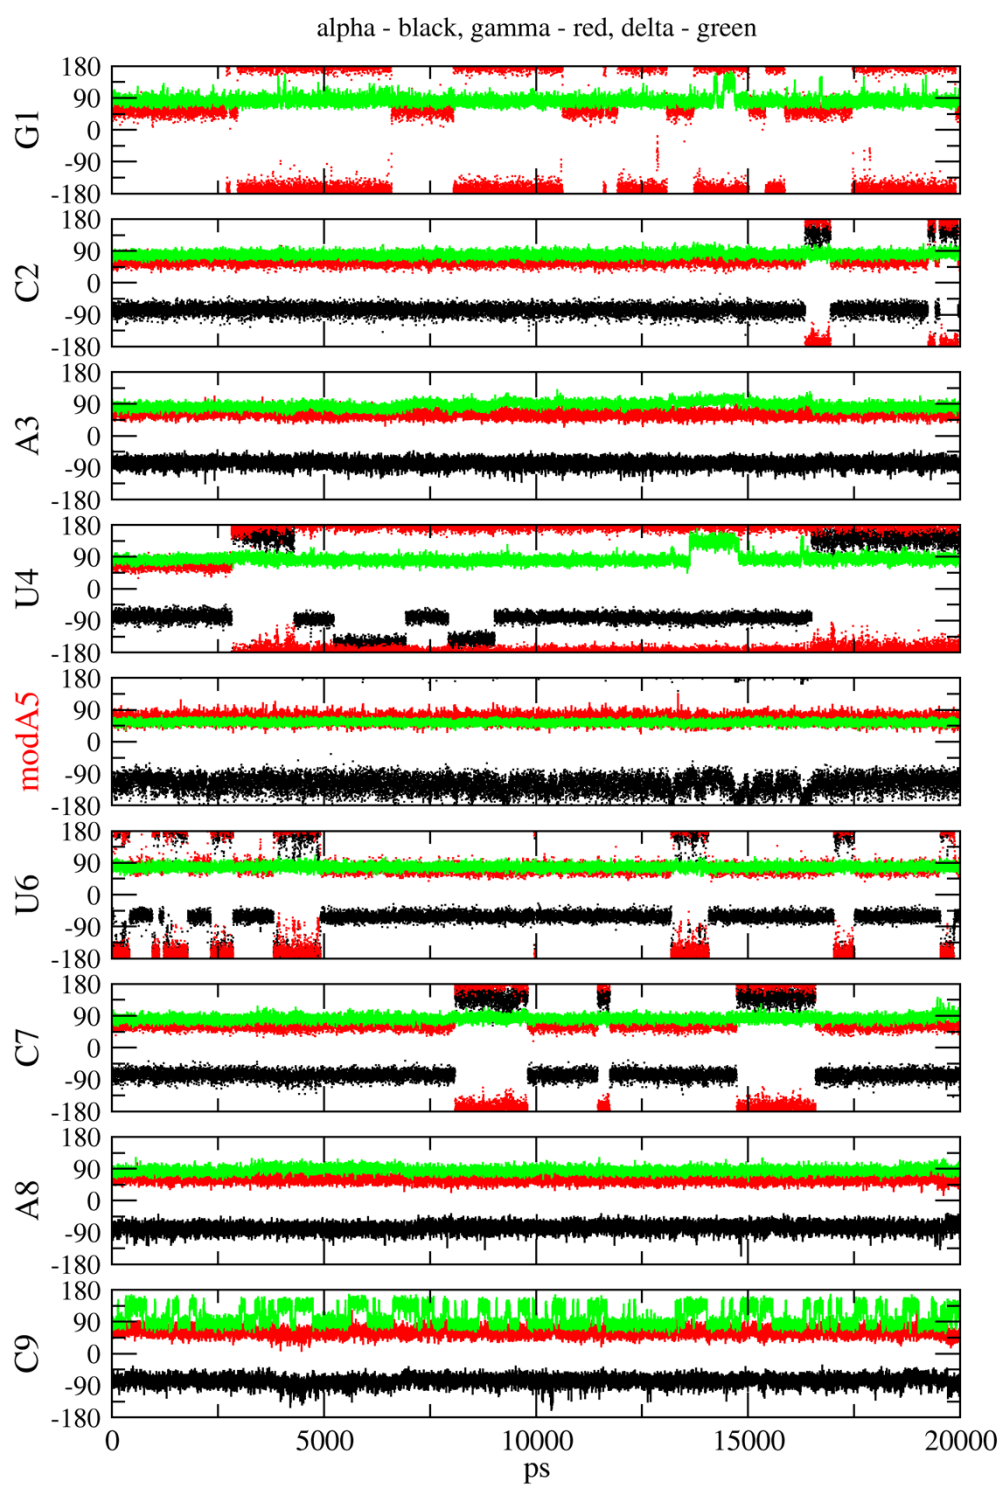

Figure S10.

Alpha, gamma and delta torsions in studied chain with 3 modifications

alpha - black, gamma - red, delta - green

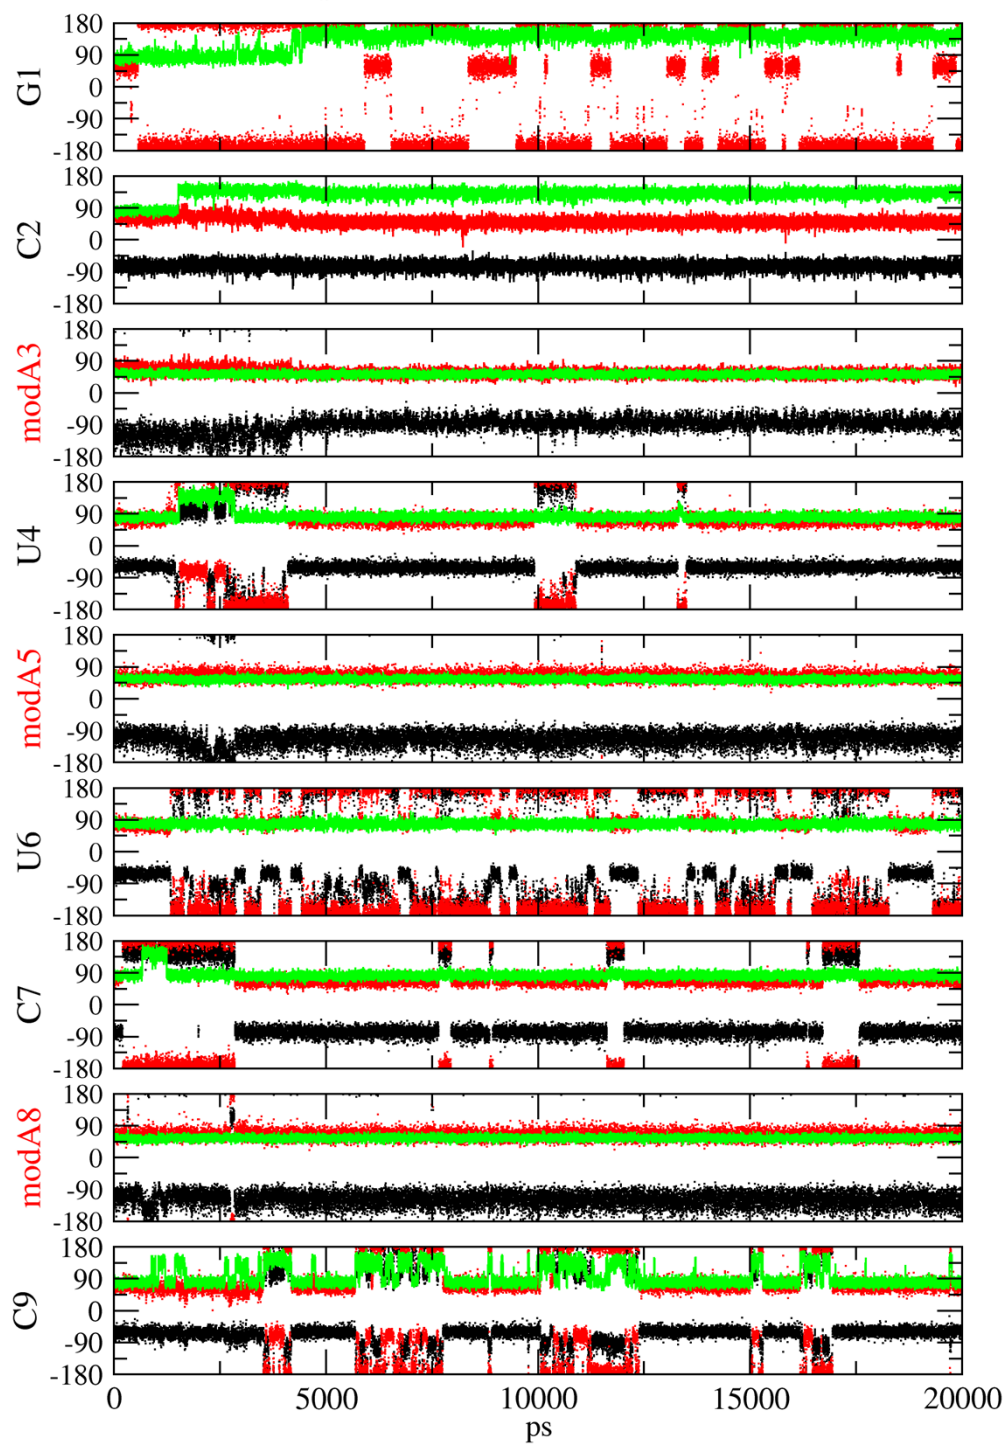

Figure S11.

Alpha, gamma and delta torsions on complementary chain of construct without modifications

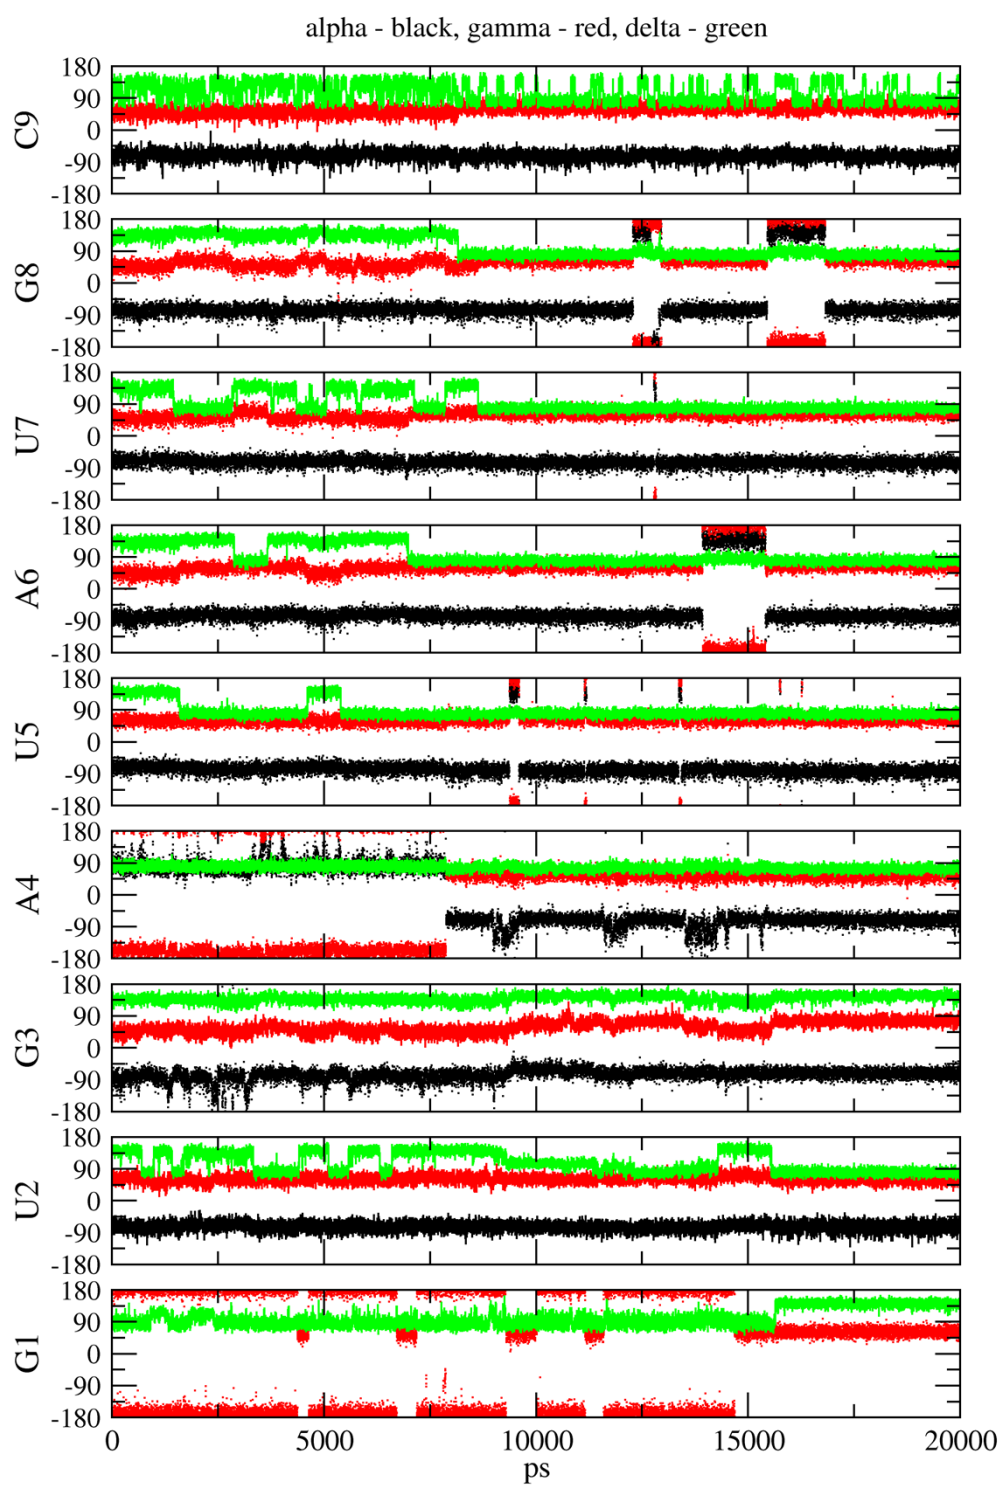

Figure S12.

Alpha, gamma and delta torsions of complementary chain to the 1 mod

alpha - black, gamma - red, delta - green

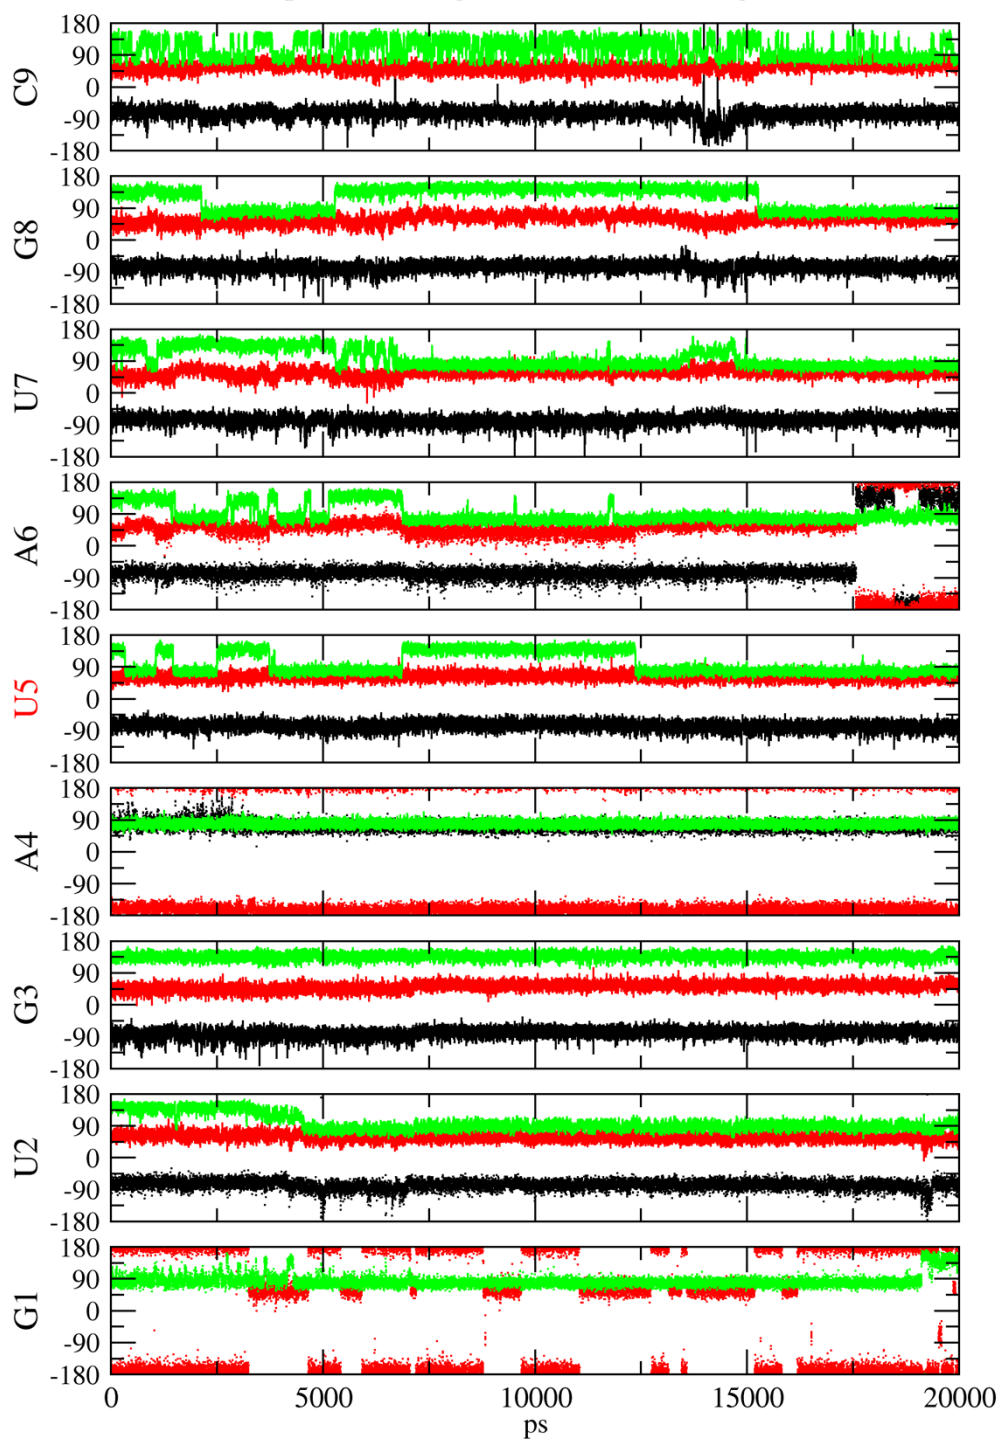

Figure S13.

Alpha, gamma and delta torsions in complementary chain to the 3mod

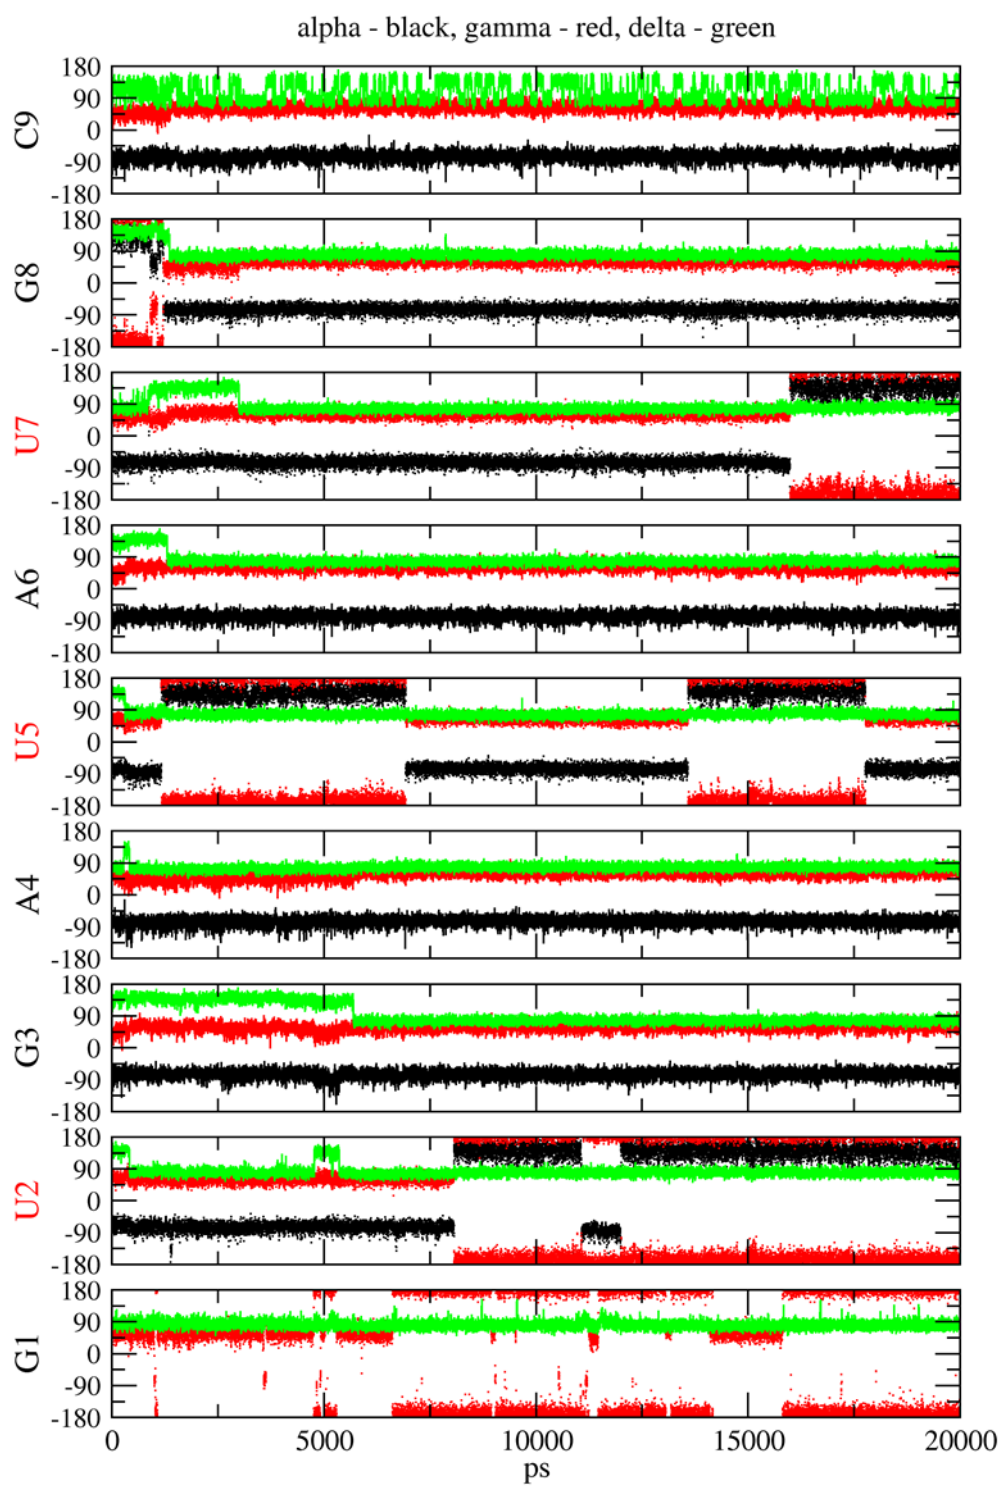



Figure S14. The distributions of alpha, gamma and delta backbone torsion angles calculated for oligonucleotides including zero, one and three modified units.

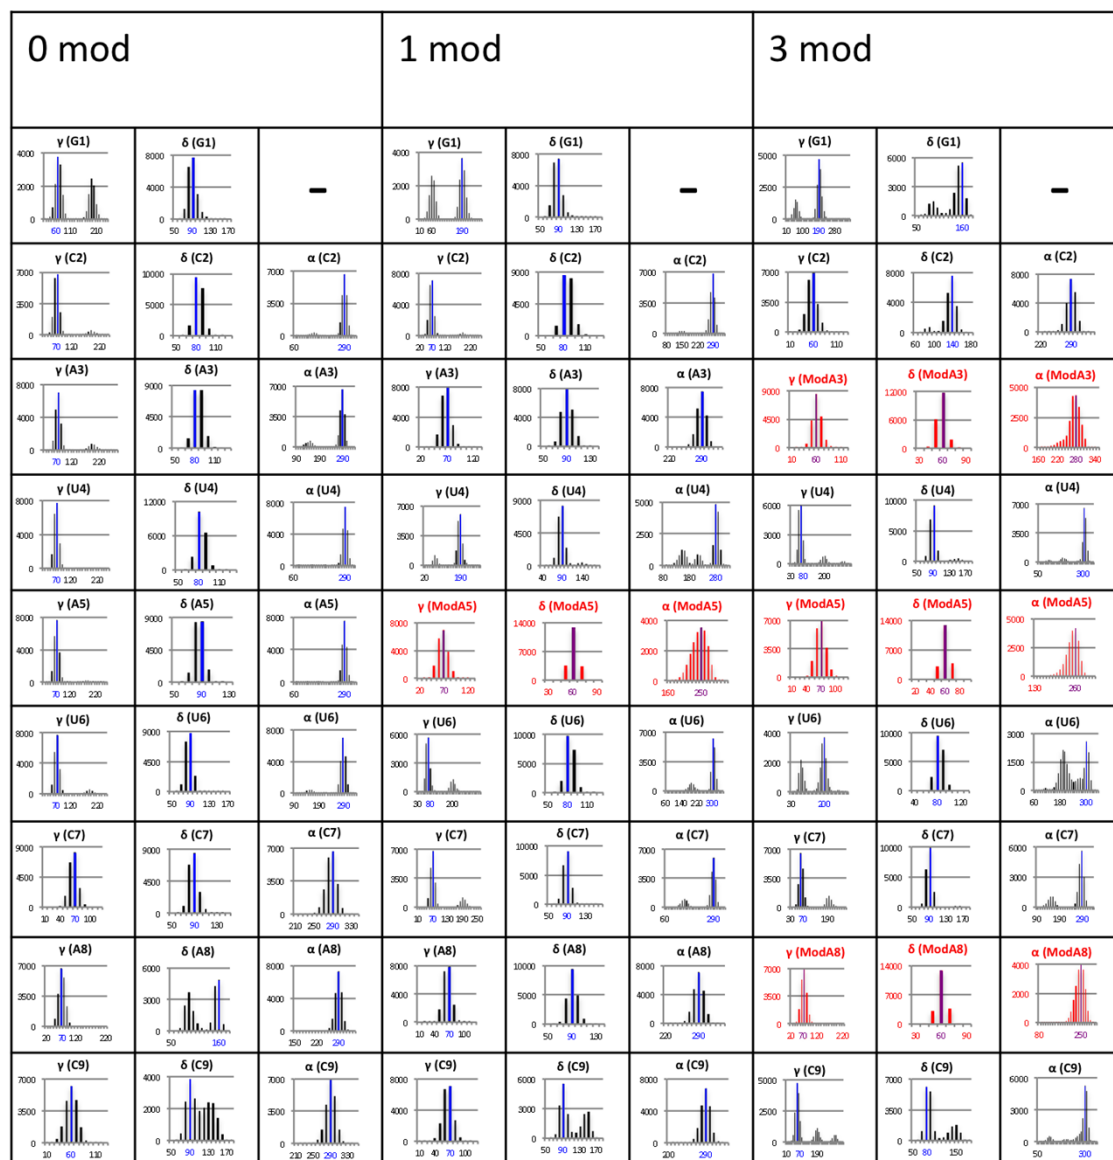

## Conformational analysis of **25** and results of the DFT calculations

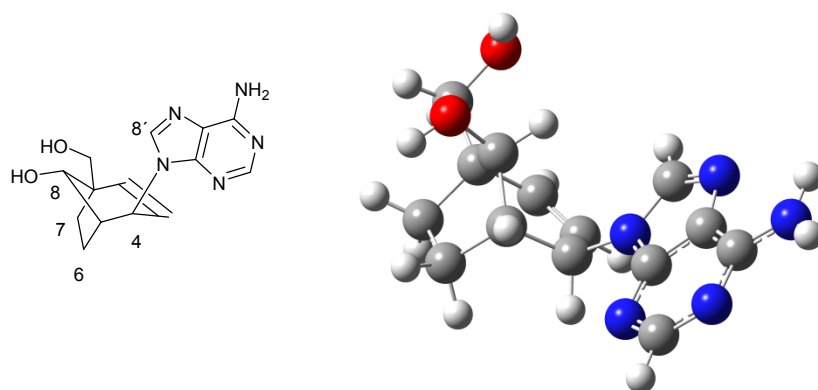

Table **S3**. Calculated (DFT calculations, B3LYP/6-31+G(d,p)) and experimental spin-spin coupling constants for compound **25**.

| Interaction | <i>J</i> experiment (Hz) | <i>J</i> Gaussian (Hz) |
|-------------|--------------------------|------------------------|
| H2-H3       | 9.5                      | 9.3                    |
| H3-H4       | 3.9                      | 4.1                    |
| H4-H5       | -                        | 2.5                    |
| H5-H8       | -                        | 1.0                    |
| H5-H6ex     | 7.9                      | 7.9                    |
| H5-H6en     | -                        | 0.7                    |
| H6ex-H7en   | 2.4                      | 2.3                    |
| H6ex-H7ex   | 10.5                     | 10.8                   |
| H6en-H7en   | 9.2                      | 9.6                    |
| H6en-H7ex   | 6.2                      | 4.8                    |

Computational details of optimized structure of compound **25**. DFT calculations were done using this method: B3LYP/6-31+g(d,p) in vacuum.

| Atomic number | x         | y         | z         |
|---------------|-----------|-----------|-----------|
| 6             | 1.956631  | -0.051852 | 0.892192  |
| 6             | 1.074884  | 1.095917  | 0.371626  |
| 6             | 0.343986  | 0.634668  | -0.917389 |
| 6             | 1.281699  | -0.116244 | -1.834443 |
| 6             | 2.537629  | -0.410261 | -1.475890 |
| 6             | 3.122463  | -0.012937 | -0.130782 |
| 6             | 3.466896  | 1.507515  | -0.169484 |
| 6             | 2.100139  | 2.223537  | 0.050307  |
| 8             | 2.376509  | 0.110819  | 2.247824  |
| 6             | 4.329235  | -0.877775 | 0.246374  |
| 8             | 4.016945  | -2.265127 | 0.359784  |
| 7             | -4.635308 | 0.826181  | 0.393126  |
| 6             | -3.734368 | 1.787603  | 0.127257  |
| 7             | -2.449541 | 1.651728  | -0.218953 |
| 6             | -2.093104 | 0.360530  | -0.290657 |
| 6             | -2.912875 | -0.745793 | -0.045935 |
| 6             | -4.248128 | -0.460539 | 0.310497  |
| 7             | -0.857795 | -0.164643 | -0.617298 |
| 6             | -1.005530 | -1.539317 | -0.547696 |
| 7             | -2.215638 | -1.928749 | -0.212373 |
| 7             | -5.156974 | -1.434582 | 0.559971  |
| 1             | 1.441291  | -1.015337 | 0.881390  |
| 1             | 0.327835  | 1.408205  | 1.106384  |



|   |           |           |           |
|---|-----------|-----------|-----------|
| 1 | -0.042172 | 1.526434  | -1.425476 |
| 1 | 0.900376  | -0.398188 | -2.813400 |
| 1 | 3.191754  | -0.930443 | -2.173157 |
| 1 | 4.178423  | 1.753330  | 0.629471  |
| 1 | 3.941798  | 1.790929  | -1.112741 |
| 1 | 1.792672  | 2.800323  | -0.827292 |
| 1 | 2.158443  | 2.939965  | 0.876800  |
| 1 | 2.655740  | 1.022724  | 2.403709  |
| 1 | 5.090845  | -0.807133 | -0.538334 |
| 1 | 4.771393  | -0.503456 | 1.177857  |
| 1 | 3.559238  | -2.406048 | 1.199106  |
| 1 | -4.103281 | 2.807064  | 0.207091  |
| 1 | -0.180482 | -2.201325 | -0.770060 |
| 1 | -4.868214 | -2.399578 | 0.584022  |
| 1 | -6.073840 | -1.172858 | 0.886597  |

Figure S15. The allylic rearrangement of the compound **22a** in DMSO- $d_6$  was monitored by  $^1\text{H}$  NMR spectroscopy within several days at room temperature. Only double bond region, where the most significant changes have been noticed, is shown. As a result, the mixture of the starting compound **22a** and the product **22** was obtained. This process provides an opportunity to recycle the undesired azido derivative **22a** and so that to increase the yield of the previous reaction.

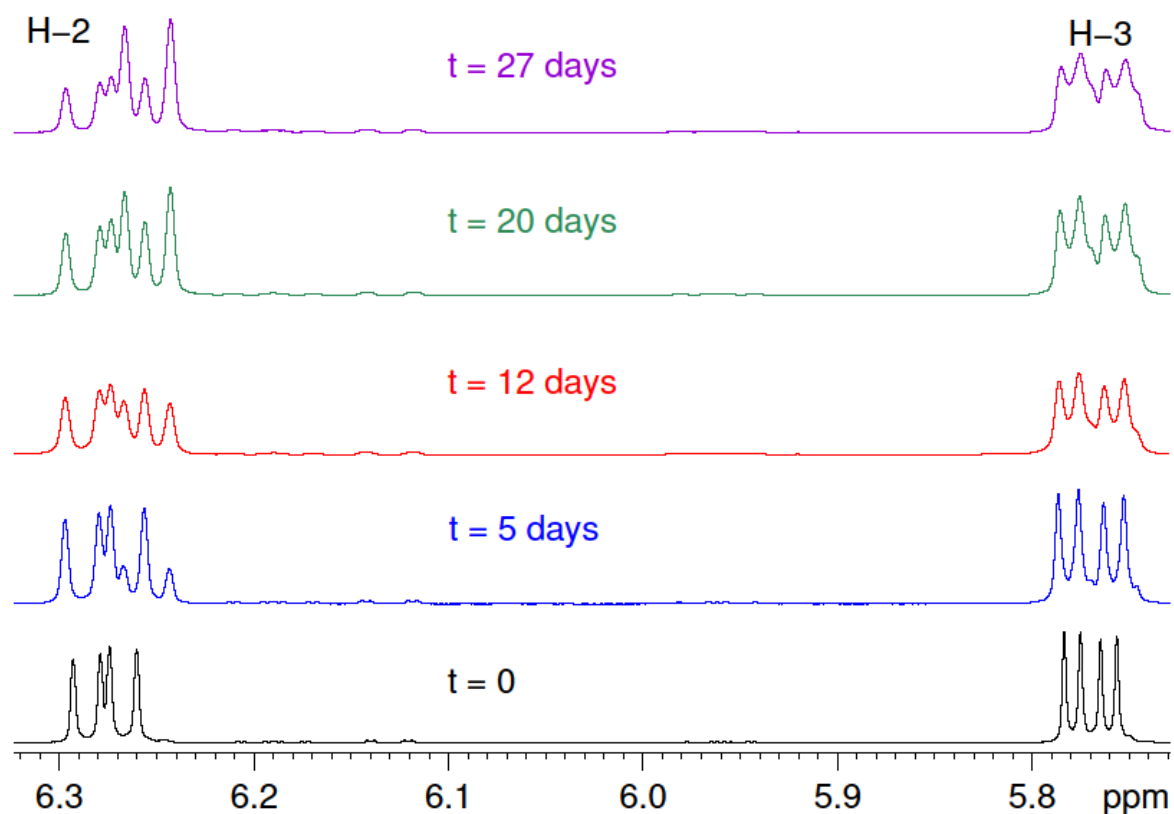

Figure **S16**. A overlaid structural model of nucleoside **25** (LCeNA monomer unit, green) with adenosine (yellow) in C3'-endo conformation

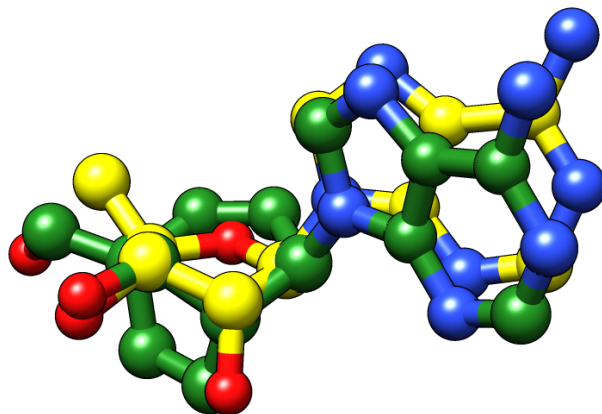

**References:**

1. F. H. Wu, R. Hong, J. H. Khan, X. F. Liu and L. Deng, *Angew. Chem. Int. Ed.* 2006, **45**, 4301-4305.
2. M.-H. Filippini, R. Faure and J. Rodriguez, *J. Org. Chem.* 1995, **60**, 6872-6882.
3. B. Schneider, Z. Morávek and H. M. Berman, *Nucleic Acids Res.* 2004, **32**, 1666-1667.
